# Supplementary material for: PRDM9 activity depends on HELLS and promotes local 5-hydroxymethylcytosine enrichment
Source: eLife. 2020 Oct 13;9:e57117. doi: 10.7554/eLife.57117 (PMC7599071; doi:10.7554/eLife.57117)
Supplement: Figure 2—source data 1. [file elife-57117-fig2-data1.xlsx]

## Sheet: Feuil1
#TUNEL-positive cells	0	1-10	>10	0	1-10	>10	#TUNEL-positive cells	0	1-10	>10						PAS (RHEM1543)
Spematids	NO	NO	NO	YES	YES	YES						no spermatid	spermatids					no spermatid	spematids
40dpp								0	1-10	>10						40dpp
Hells CTRL	0	0	0	156	29	0		156	29	0	n	0	185	n		Control	n	1	175
A	0	0	0	0.843243	0.156757	0	Control	84.3243	15.6757	0	%	0	100	%		62, f/-; Str0/0	%	0.568182	99.4318	%
63, f/-; Str+/+																A
Hells cKO	58	68	39	7	3	6		65	71	45	n	165	16	n		Hells cKO	n	205	26
C	0.320442	0.375691	0.21547	0.038674	0.0165746	0.0331492	Hells cKO	35.9116	39.2265	24.8619	%	91.1602	8.83978	%		61, f/-; StrTg/+	%	88.7446	11.2554	%
64, f/-; StrTg/+																C
Hells CTRL	0	0	0	188	24	0		188	24	0	n	0	212	n		Control	n	0	217
B	0	0	0	0.886792	0.113208	0	Control	88.6792	11.3208	0	%	0	100	%		62, f/-; Str0/0	%	0	100	%
																B
Hells cKO	86	37	29	13	3	0		99	40	29	n	152	16	n		Hells cKO	n	125	21
D	0.511905	0.220238	0.172619	0.077381	0.0178571	0	Hells cKO	58.9286	23.8095	17.2619	%	90.4762	9.52381	%		61, f/-; StrTg/+	%	85.6164	14.3836	%
																D
Control	0	0	0	0.865018	0.134982	0		86.5018	13.4982	0	%	0	100	%				0.284091	99.7159	%
Moy(A;B)	0	0	0	0.0307939	0.0307939	0	Hells CTRL	3.07939	3.07939	0		0	0			Hellsctrl		0.401765	0.401765
Hells cKO	0.416173	0.297964	0.194044	0.0580275	0.0172159	0.0165746		47.4201	31.518	21.0619	%	90.8182	9.18179	%				87.1805	12.8195	%
Moy(C;D)	0.135385	0.109922	0.0302999	0.0273699	0.000906905	0.02344	Hells cKO	16.2755	10.9015	5.37399		0.483683	0.483683			HellscKO		2.21194	2.21194
																		no spermatid	spematids
																Hellsctrl	Moy	0.142045	99.858	%
																62 (PAS), 63 (TUNEL)	STD	0.284091	0.284091	%
																HellscKO	MOY	88.9994	11.0006	%
																61 (PAS), 64 (TUNEL)	STD	2.47382	2.47382	%
Images (on OMERO)
Control	715608	715609	715610	715611	715612	715613	715614	715615	715616	715617	715618	715619	715620	715621	715622	715623	715624	715625	715626	715627
cKO	715630	715631	715632	715633	715634	715635	715636	715637
