# Supplementary material for: PRDM9 activity depends on HELLS and promotes local 5-hydroxymethylcytosine enrichment
Source: eLife. 2020 Oct 13;9:e57117. doi: 10.7554/eLife.57117 (PMC7599071; doi:10.7554/eLife.57117)
Supplement: Figure 3—source data 1. [file elife-57117-fig3-data1.xlsx]

## Sheet: Feuil1 (2)
200129				Pbx1 2.024											14A 1.922									Hlx16 2.036	Experiment: 200130_Hlx16_IP_HELLS_H3K4me3_PRDM9_TET1_KO_WT_Hells Active filter: SYBR Green I / HRM Dye (465-510)									Psmb9_8 1.946	Experiment: 200130_Psmb98_IP_HELLS_H3K4me3_PRDM9_TET1_KO_WT_Hells Active filter: SYBR Green I / HRM Dye (465-510)
				Samples	MeanCp	STD Cp	Mean conc	STD conc							Samples	MeanCp	STD Cp	Mean conc	STD conc						Samples	MeanCp	STD Cp	Mean conc	STD conc						Samples	MeanCp	STD Cp	Mean conc	STD conc
	Genotype		20	A1, A7	23.8479	0.27921	20.4784	4.00689						20	A1, A7	23.4649	0.0134943	19.3258	0.170389					20	A1, A7	23.8495	0.0104635	22.4731	0.167205					20	A1, A7	23.8375	0.0394944	20.2667	0.532736
A1= Hells cKO	f/- Tg/0		4	A2, A8	26.105	0.0529229	4.12943	0.154102						4	A2, A8	25.8698	0.00839574	4.01547	0.0220268					4	A2, A8	26.4353	0.0103354	3.57379	0.0262642					4	A2, A8	26.3923	0.0621547	3.70115	0.153084
A2=Hells cKO	f/- Tg/0		0.8	A3, A9	28.5981	0.11327	0.712496	0.0568605						0.8	A3, A9	28.2048	0.0691442	0.873753	0.0394598					0.8	A3, A9	28.7936	0.0424135	0.668264	0.0201511					0.8	A3, A9	28.5349	0.168515	0.891513	0.0997929
A3=Hells CTRL	f/+ Tg/0		0.16	A10, A4	30.6114	0.564489	0.178797	0.0693629						0.16	A10, A4	30.8898	0.079212	0.15112	0.00793992					0.16	A10, A4	30.5557	0.101057	0.191101	0.0137003					0.16	A10, A4	31.1711	0.00967584	0.153703	0.000990578
A4=Hells CTRL	f/+ Tg/0		0.032	A11, A5	32.9463	0.552197	0.0343921	0.0130659						0.032	A11, A5	32.2427	0.288005	0.0332963	0.0151784					0.032	A11, A5	33.4014	0.591344	0.0330003	0.0104352					0.032	A11, A5	32.9415	0.176451	0.0322432	0.00625913
			H2O	A12, A6	37.4994	0.938636	0.0014841	0.000916519	IP/Input	Norm Hlx16				H2O	A12, A6	38.0501	2.75752	1.2435e-07	1.75857e-07	IP/Input	Norm Hlx16			H2O	A12, A6	37.6227	0	0.00543557	0	IP/Input	Norm_Hlx16			H2O	A12, A6	38.4816	2.14739	2.48202e-05	3.50644e-05	IP/Input	Norm_Hlx16
		A1											A1										A1										A1
			H3K4me3	B2, B8	23.4643	0.0237631	26.5846	0.445543	4.98846	3.69136				H3K4me3	B2, B8	24.0441	0.018954	13.237	0.163923	2.48385	1.838			H3K4me3	B2, B8	25.45	0.0362596	7.20184	0.185666	1.35139	1			H3K4me3	B2, B8	25.8986	0.0257399	5.13947	0.0880537	0.964396	0.713633
			PRDM9	B3, B9	32.3056	0.629276	0.0546371	0.0234837	0.0102524	1.92549				PRDM9	B3, B9	32.2067	0.530891	0.0383388	0.0293596	0.00719409	1.35111			PRDM9	B3, B9	33.6339	0.233904	0.0283757	0.00351056	0.00532456	1			PRDM9	B3, B9	33.7949	0.40578	0.0120598	0.00616727	0.00226295	0.425003
			Input	B11, B5	25.7434	0.054587	5.32921	0.205126						Input	B11, B5	26.1302	0.13131	3.39345	0.29078					Input	B11, B5	26.5416	0.111685	3.31866	0.263279					Input	B11, B5	26.0694	0.034358	4.58741	0.104906
		A2											A2										A2										A2
			H3K4me3	C2, C8	23.8484	0.0274633	20.2765	0.39273	4.1452	4.07475				H3K4me3	C2, C8	24.5027	0.00354233	9.80947	0.0227035	2.00539	1.97131			H3K4me3	C2, C8	25.9701	0.0459033	4.97612	0.162394	1.01729	1			H3K4me3	C2, C8	26.503	0.116397	3.44192	0.266412	0.703647	0.691688
			PRDM9	C3, C9	29.9475	0.197193	0.275955	0.0382568	0.0564147	3.11833				PRDM9	C3, C9	31.3692	0.431362	0.10282	0.0431662	0.02102	1.16188			PRDM9	C3, C9	31.8175	0.848809	0.0884946	0.0456433	0.0180913	1			PRDM9	C3, C9	31.1704	0.553191	0.157896	0.058843	0.0322794	1.78424
			Input	C11, C5	25.8644	0.0163556	4.89155	0.0564262						Input	C11, C5	26.5061	0.00819019	2.6496	0.0141785					Input	C11, C5	26.6213	0.109237	3.13574	0.243324					Input	C11, C5	26.1397	0.175173	4.39203	0.510967
		A3											A3										A3										A3
			H3K4me3	D2, D8	21.432	0.0129224	111.462	1.01588	29.0573	19.0502				H3K4me3	D2, D8	22.2128	0.0376389	43.8024	1.07708	11.419	7.48637			H3K4me3	D2, D8	25.7423	0.0454398	5.85095	0.189017	1.5253	1			H3K4me3	D2, D8	26.4923	0.024978	3.46152	0.0575505	0.902393	0.591617
			PRDM9	D3, D9	26.2452	0.0912156	3.74328	0.240657	0.975846	13.8355				PRDM9	D3, D9	27.7244	0.186452	1.19975	0.145796	0.312767	4.43439			PRDM9	D3, D9	30.1424	0.666261	0.270556	0.123573	0.070532	1			PRDM9	D3, D9	29.6467	0.683303	0.4461	0.196185	0.116295	1.64882
			Input	D11, D5	26.2115	0.11818	3.83594	0.319367						Input	D11, D5	26.5723	0.0243464	2.53752	0.0403632					Input	D11, D5	26.7166	0.0455702	2.9265	0.0948126					Input	D11, D5	26.4322	0.143899	3.61086	0.345342
		A4											A4										A4										A4
			H3K4me3	E2, E8	22.0771	0.00761741	70.717	0.379931	16.8393	16.7912				H3K4me3	E2, E8	22.9206	0.0224656	27.5815	0.404836	6.56777	6.54901			H3K4me3	E2, E8	26.2052	0.0687401	4.21155	0.205775	1.00286	1			H3K4me3	E2, E8	27.0155	0.121397	2.44734	0.197548	0.582766	0.581101
			PRDM9	E3, E9	28.5127	0.112408	0.756697	0.0599297	0.180187	14.1039				PRDM9	E3, E9	29.9274	0.0625816	0.28349	0.0115884	0.0675054	5.2839			PRDM9	E3, E9	32.5774	0.69302	0.0536517	0.0214255	0.0127757	1			PRDM9	E3, E9	32.2954	0.51667	0.0647772	0.0304585	0.0154249	1.20736
			Input	E11, E5	26.0883	0.208416	4.19952	0.6151						Input	E11, E5	26.3597	0.125792	2.92051	0.239762					Input	E11, E5	26.6435	0.00980668	3.08192	0.0214908					Input	E11, E5	26.0484	0.0377207	4.65207	0.116795
																							A5
																								H3K4me3	F2, F8	26.523	0.0990953	3.36169	0.236681	1.20825	1
				A3 1.919											17B 1.995									PRDM9	F3, F9	33.1417	0.0810522	0.0369526	0.00167425	0.0132814	1
				Experiment: 200130_A3_IP_HELLS_H3K4me3_PRDM9_KO_WT_Hells Active filter: SYBR Green I / HRM Dye (465-510)											Experiment: 200130_17B_IP_HELLS_H3K4me3_PRDM9_KO_WT_Hells Active filter: SYBR Green I / HRM Dye (465-510)
				Samples	MeanCp	STD Cp	Mean conc	STD conc							Samples	MeanCp	STD Cp	Mean conc	STD conc					Input	F11, F5	26.7878	0.0514151	2.78227	0.101696
			20	A1, A7	24.8126	0.066517	20.1626	0.873593						20	A1, A7	24.9167	0.246354	19.5489	3.30903
			4	A2, A8	27.3181	0.194309	3.95435	0.499315						4	A2, A8	27.1218	0.0724942	4.23738	0.211995
			0.8	A3, A9	29.7523	0.089988	0.806999	0.0472906						0.8	A3, A9	29.5746	0.21535	0.782999	0.115989
			0.16	A10, A4	32.368	0.240282	0.147566	0.0230094						0.16	A10, A4	32.1292	0.916765	0.147062	0.0873276					Scp1 1.928	Experiment: 200130_Scp1_IP_H3K4me3_KO_WT_Hells Active filter: SYBR Green I / HRM Dye (465-510)
			0.032	A11, A5	35.3093	0.523402	0.0222093	0.0074307						0.032	A11, A5	35.0031	0.158957	0.0184077	0.00201611						Samples	MeanCp	STD Cp	Mean conc	STD conc
			H2O	A12, A6	36.5436	0.370367	0.0097958	0.00234127	IP/Input	Norm Hlx16				H2O	A12, A6	40	0	0.000582648	0	IP/Input	Norm Hlx16			20	A1, A7	25.0415	0.346057	19.7409	4.44622
		A1	H3K4me3	B2, B6	25.5819	0.371121	12.3867	2.96643	2.49334	1.84502			A1											4	A2, A8	27.5266	0.314002	3.85395	0.788803
			PRDM9	B3, B7	34.0521	0.658721	0.0512234	0.0213344	0.0103108	1.93646				H3K4me3	B2, B6	25.5496	0.142598	12.5684	1.23537	3.52324	2.60713			0.8	A3, A9	29.6726	0.220856	0.937114	0.135386
			Input	B4, B8	26.9619	0.03221	4.96793	0.104256						PRDM9	B3, B7	34.2867	0.770185	0.0322466	0.016382	0.00903956	1.69771			0.16	A10, A4	32.4782	0.803748	0.150855	0.0902079
														Input	B4, B8	27.3852	0.295713	3.56727	0.723286					0.032	A11, A5	33.7035	0.219918	0.0329332	0.0129811
		A2	H3K4me3	C2, C6	26.1041	0.255245	8.74686	1.44804	1.75037	1.72062			A2											H2O	A12, A6	40	0	1.41e-15	0	IP/Input	Norm_Hlx16
			PRDM9	C3, C7	31.8039	0.248485	0.213205	0.0343693	0.0426654	2.35833				H3K4me3	C2, C6	25.8634	0.157859	10.1259	1.10141	2.7727	2.72557		H3K4me3	IP a1	B1, B7	21.9367	0.315542	151.198	31.0959	33.8142	25.0218
			Input	C4, C8	26.9532	0.0552873	4.99714	0.179977						PRDM9	C3, C7	32.2146	0.762446	0.134646	0.0677761	0.0368693	2.03795			IP a2	B2, B8	22.0359	0.194508	140.728	17.9197	29.419	28.9189
														Input	C4, C8	27.3415	0.175752	3.65199	0.44205					IP a3	B3, B9	22.2697	0.272796	121.185	21.5856	22.2192	14.5671
		A3	H3K4me3	D2, D6	23.7521	0.677942	42.196	18.0559	10.0835	6.61082			A3											IP a4	B10, B4	22.6214	0.281061	96.2457	17.657	26.3837	26.3083
			PRDM9	D3, D7	28.8817	0.329492	1.43834	0.306446	0.343718	4.87321				H3K4me3	D2, D6	23.6635	0.111559	46.1727	3.55278	16.8385	11.0395			Input a1	C1, C7	27.2986	0.298248	4.47143	0.869865
			Input	D4, D8	27.3006	0.686346	4.18467	1.81143						PRDM9	D3, D7	29.0048	0.750809	1.2324	0.611682	0.449439	6.37212			Input a2	C2, C8	27.1832	0.107619	4.7836	0.337656
														Input	D4, D8	27.7654	0.286702	2.74209	0.539256					Input a3	C3, C9	26.9949	0.286846	5.45405	1.02095
		A4	H3K4me3	E2, E6	24.1634	0.523433	31.6632	10.5943	7.93655	7.91387			A4											Input a4	C10, C4	27.6037	0.241285	3.64792	0.575383
			PRDM9	E3, E7	31.2694	0.343371	0.303824	0.067414	0.0761553	5.96095				H3K4me3	E2, E6	24.2807	0.274299	30.3782	5.71883	10.0904	10.0616			Input a5	C11, C5	27.7339	0	3.32811	0
			Input	E4, E8	27.3239	0.396948	3.98954	1.02051						PRDM9	E3, E7	31.2112	0.0464947	0.251633	0.0080761	0.0835822	6.54228
														Input	E4, E8	27.6176	0.0977839	3.0106	0.203094
