# Supplementary material for: PRDM9 activity depends on HELLS and promotes local 5-hydroxymethylcytosine enrichment
Source: eLife journal article supplement (doi:10.7554/elife.57117), 2020-10-13
Supplement: supp [file elife_poa_e57117_Figure_1_figure_supplement_1.pdf › elife_poa_e57117_Figure_1_figure_supplement_1.pdf]

**A**

**B**

Western blot analysis showing the expression of GAD65 (α-GAD) and GBD in HELLIS and PACT2 cell lines. The blots are probed with anti-GAD65 and anti-GBD antibodies. Molecular weight markers are indicated on the right (250kD, 150kD, 100kD, 75kD, 50kD). The lanes are labeled: HELLS FL/PRDM9 FL, HELLS 1-408/PRDM9 FL, HELLS 193-569/PRDM9 FL, HELLS 402-821/PRDM9 FL, HELLS 1-569/PRDM9 FL, REC114/MEI4, and PACT2/PRDM9 FL. The α-GAD blot shows a strong band at ~75kD in the HELLS 1-569/PRDM9 FL lane. The α-GBD blot shows a strong band at ~75kD in the PACT2/PRDM9 FL lane. The α-tubulin blot shows a strong band at ~50kD in the HELLS 1-569/PRDM9 FL lane.
