# Supplementary material for: PRDM9 activity depends on HELLS and promotes local 5-hydroxymethylcytosine enrichment
Source: eLife journal article supplement (doi:10.7554/elife.57117), 2020-10-13
Supplement: supp [file elife_poa_e57117_Figure_2_figure_supplement_1.pdf › elife_poa_e57117_Figure_2_figure_supplement_1.pdf]

Figure 2- Figure supplement 1

A

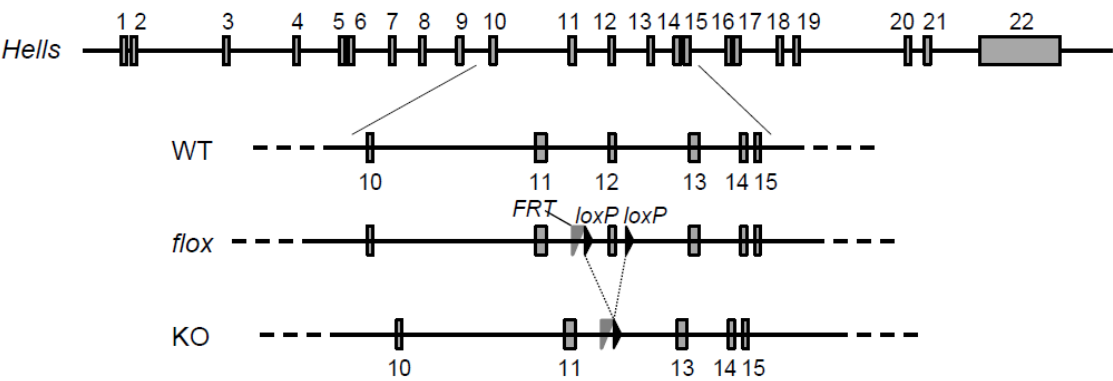

B

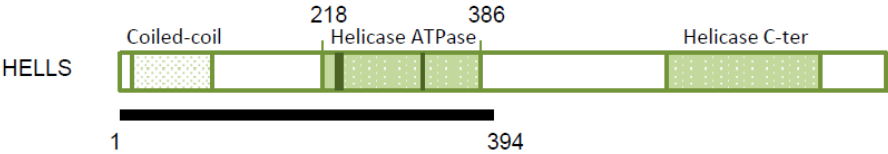

|       |                                                                                                       |     |
|-------|-------------------------------------------------------------------------------------------------------|-----|
| WT/KO | MAEQTEPAVITPAMLEEEQLEAAGLEKERKMLEEAQKSWDRESTEIRYRLQHLLEKSNIYSKFLLTKMEQQQLEEQKKKEKLEKKKRSCLKTEGKSLV    | 100 |
| WT/KO | DGNGEKPVMMKKRGREDESYNISEVMSKEEILSVAKKKHDNEDESSSTTSLCVEDIQNKDSNSMIKDRLSQTVRQNSKEFFDPVRKCNQGPVPFQQPKH   | 200 |
| WT/KO | FTGGVMRWYQVEGMEWLRMLWENGINGILADEMGLGKTVQCIATIALMIQRGVPGPFLVCGPLSTLPNWMAEFKRFTPEIPTLLYHGTREDRRLVKNIH   | 300 |
| WT    | KRQGTQLQIHPVVVTSFEIAMRDQNALQHCYWKYLIVDEGHRIRKMKRLIRELKRFNADNKLLLTGTPLQNNLSELWSSLNFFLLPDVFDLKSFSWFDI   | 400 |
| KO    | KRQGTQLQIHPVVVTSFEIAMRDQNALQHCYWKYLIVDEGHRIRKMKRLIRELKRFNADNKLLLTGTPLQNNLSELWSSLNFFLLPDVFDLKR-        | 394 |
| WT    | TSLSETAEDIIAKEREQNVLMHLHQLTPFLLRLKSDVALEVPPKREVVVVYAPLCNKQEIFYTAIVNRTIANMFGSCEKETVELSPTGRPKRRSRKSIN   | 500 |
| WT    | YSELQDFPSELEKLISQIQPEVNRERTVVEGNIPIESEVNLKLRNIMMLLRKCCNHPYMIIEYPIDPVTQEFKIDEELVTNSGKFLILDRMLPELKKRGHK | 600 |
| WT    | VLVFSQMTSMLDILMDYCHLRNFIFSRLDGMSYSEREKNIYSFNTDPDVFLVSTRAGGLGINLTAADTVIIYDSDNWPNQSDLAQADRCHRIGQTKPV    | 700 |
| WT    | VVYRLVTANTIDQKIVERAAAKRLEKLIHKNHFKGGQSGLSQSKNFLDAKELMELLKSRDYEREVKGSRKVISDEDELELLLDRLIDQMKASRPIK      | 800 |
| WT    | GKTGIFKILENSEDSSAECFL-                                                                                | 821 |
