# Supplementary material for: PRDM9 activity depends on HELLS and promotes local 5-hydroxymethylcytosine enrichment
Source: eLife. 2020 Oct 13;9:e57117. doi: 10.7554/eLife.57117 (PMC7599071; doi:10.7554/eLife.57117)
Supplement: Supplementary file 1. — Proteins are displayed in four separate sheets: HeLa S3 cell extracts with size selection. Six samples: two from Hela S3 cells that express N-terminally tagged (Nter1 and Nter2) PRDM9, two that express C-terminally tagged (Cter1 and Cter2) PRDM9, and two that do not express PRDM9 (no PRDM9). HeLa S3 cell extracts without size selection. Three samples from Hela S3 cells that express N-terminally tagged (Nter) PRDM9, C-terminally tagged (Cter) PRDM9, or that do not express PRDM9 (no PRDM9). Mouse testis rep1. Two samples from the IP with the anti-PRDM9 antibody and with rabbit serum (mock). Mouse testis rep2. Four samples: two from the IP with the anti-PRDM9 antibody (PRDM9-1 and PRDM9-2) and two with rabbit serum (mock-1 and mock-2). Proteins are ranked by peptide counts after the PRDM9 IP. Additional quantifications were performed in the mouse testis samples. These include MS/MS count, iBAQ, iBAQ rank difference between PRDM9 IP and mock, LFQ intensity and LFQ intensity rank difference between PRDM9 IP and mock. [file elife-57117-supp1.xlsx]

## Sheet: HeLa with size selection
Statistics	36 unique, 42 total peptides; 16 proteins				50 unique, 55 total peptides; 32 proteins				27 unique, 35 total peptides; 21 proteins				73 unique, 81 total peptides, 34 proteins
Sample	Nter1				Cter1				Nter2				Cter2				no PRDM9		no PRDM9
Section Size	95-120 kd				95-120 kd				70-80 kd				70-80 kd				95-120 kd		70-80 kd
Sample ID	43350				43348				43351				43349				43346		43347
	Gene	Total peptides	Unique peptides		Gene	Total peptides	Unique peptides		Gene	Total peptides	Unique peptides		Gene	Total peptides	Unique peptides		Gene	Total peptides	Gene	Total peptides
	HELLS	11	11		GEMIN4	7	7		PRDM9	7	5		DDX3X	10	9		SFPQ	2	DDX3X	5
	GEMIN4	10	8		HELLS	4	4		GEMIN4	4	2		DDX17	8	8		ACTA2	2	DDX17	3
	ACTA2	3	2		RBM10	3	3		KV113	4	1		PRDM9	7	6		CDSN	2	FUS	3
	KV113	3	1		ACTA2	3	3		ACTA2	2	1		DDX1	6	6		ANXA1	1	SEMG2	2
	RBM10	2	2		YWHAZ	2	2		PRDM7	2	1		KV113	6	1		KV201	1	ACTA2	2
	MAP7	2	2		SFPQ	2	2		HSPB1	1	1		EIF4B	4	4		RBM10	1	IgG1 (bovine)	2
	KV201	2	1		A2M	2	2		FUS	1	1		ANXA1	3	3		PRDX1	1	EWSR1	1
	SFPQ	1	1		MAP7	2	2		KV201	1	1		HNRNPM	3	3		SF3A1	1	KV201	1
	CAT	1	1		LYZ	2	2		EWSR1	1	1		FIP1L1	2	2		KLK1	1	TXN	1
	PRSS3	1	1		SF3A1	2	1		DDX17	1	1		ACTA2	2	2		COL1A1	1	EEF1A1	1
	DDX20	1	1		GAPDH	2	1		EEF1A1	1	1		GEMIN4	2	2		IGHA1	1	SEMG1	1
	PRDX1	1	1		TUBB4A	2	1		TUBB4A	1	1		HSPA1L	2	2		GAPDH	1	IGLL5	1
	IGLL5	1	1		CDSN	2	1		CDSN	1	1		HSPA1A	2	2		IGLL5	1
	IGLC2	1	1		HNRNPU	2	1		PRDX1	1	1		IgG1 (bovine)	2	2		EEF1A1	1
	A2M	1	1		IgG1 (bovine)	1	1		AZGP1	1	1		SPRR3	2	2		A2M	1
	COL1A1	1	1		CAT	1	1		HNRNPM	1	1		PRDM7	2	1		CLTC	1
					HIST1H4A	1	1		IGLL5	1	1		FUS	1	1
					ANXA1	1	1		GAPDH	1	1		EWSR1	1	1
					KV201	1	1		IGHA1	1	1		KV201	1	1
					MYL6B	1	1		COL1A1	1	1		SLAIN2	1	1
					HSPB1	1	1		ACTR5	1	1		HSPB1	1	1
					EEF1A1	1	1						PLOD3	1	1
					PRDX1	1	1						RACGAP1	1	1
					LMNA	1	1						HSPA8	1	1
					CSTB	1	1						RBM10	1	1
					LTF	1	1						EEF1A1	1	1
					ACTB	1	1						HSPA6	1	1
					CAPRIN1	1	1						IGLL5	1	1
					IGLL5	1	1						COL1A1	1	1
					SPRR3	1	1						IGHA1	1	1
					IGHA1	1	1						DDX5	1	1
					TUBA1A	1	1						A2M	1	1
													TUBB4A	1	1
													CPSF3	1	1

## Sheet: HeLa without size selection
Statistics		2029 unique, 2291 total peptides, 447 proteins					1455 unique, 1599 total peptides, 364 proteins					513 unique, 553 total peptides, 162 proteins
Sample	Nter					Cter					no PRDM9
Sample ID		43740					43739					43738
	Unique peptides	Total peptides	reference	Gene Symbol		Unique peptides	Total peptides	reference	Gene Symbol		Unique peptides	Total peptides	reference	Gene Symbol
	62	97	HELLS_HUMAN	HELLS		38	44	HELLS_HUMAN	HELLS		34	36	FLNA_HUMAN	FLNA
	63	71	UBR5_HUMAN	UBR5		39	41	UBR5_HUMAN	UBR5		20	21	HNRPU_HUMAN	HNRNPU
	47	49	FLNA_HUMAN	FLNA		33	35	FLNA_HUMAN	FLNA		19	20	DHX9_HUMAN	DHX9
	9	44	PRDM7_HUMAN	PRDM7		21	35	PRDM9_HUMAN	PRDM9		15	18	RBM10_HUMAN	RBM10
	34	38	GEMI5_HUMAN	GEMIN5		9	33	PRDM7_HUMAN	PRDM7		14	14	TR150_HUMAN	THRAP3
	20	38	PRDM9_HUMAN	PRDM9		26	31	RBM10_HUMAN	RBM10		11	13	IF4B_HUMAN	EIF4B
	27	32	GEMI4_HUMAN	GEMIN4		28	30	GEMI4_HUMAN	GEMIN4		12	12	RFA1_HUMAN	RPA1
	28	31	TR150_HUMAN	THRAP3		20	23	HNRPU_HUMAN	HNRNPU		11	11	ROA2_HUMAN	HNRNPA2B1
	28	30	DDX20_HUMAN	DDX20		21	22	ANM5_HUMAN	PRMT5		7	11	NPM_HUMAN	NPM1
	25	30	RBM10_HUMAN	RBM10		21	22	TR150_HUMAN	THRAP3		9	10	TOP1_HUMAN	TOP1
	26	28	SOGA2_HUMAN	SOGA2		20	21	SF3B3_HUMAN	SF3B3		9	10	ZA2G_HUMAN	AZGP1
	24	26	HUWE1_HUMAN	HUWE1		19	21	SF3B1_HUMAN	SF3B1		9	9	SFPQ_HUMAN	SFPQ
	21	25	HSP7C_HUMAN	HSPA8		20	20	GEMI5_HUMAN	GEMIN5		7	9	DDX1_HUMAN	DDX1
	15	25	TBB2A_HUMAN	TUBB2A		17	19	HSP7C_HUMAN	HSPA8		7	9	SF3B1_HUMAN	SF3B1
	21	24	GRP78_HUMAN	HSPA5		16	19	DHX9_HUMAN	DHX9		6	8	HNRH1_HUMAN	HNRNPH1
	23	23	ANM5_HUMAN	PRMT5		16	18	SFPQ_HUMAN	SFPQ		7	7	LMO7_HUMAN	LMO7
	20	22	IF4B_HUMAN	EIF4B		17	17	SF3B2_HUMAN	SF3B2		7	7	STK38_HUMAN	STK38
	19	22	RUVB2_HUMAN	RUVBL2		15	16	RUVB2_HUMAN	RUVBL2		7	7	SF3B2_HUMAN	SF3B2
	17	22	TBA1A_HUMAN	TUBA1A		14	15	RFA1_HUMAN	RPA1		6	7	TOP2A_HUMAN	TOP2A
	19	21	RFA1_HUMAN	RPA1		14	15	TBA1A_HUMAN	TUBA1A		6	7	CATA_HUMAN	CAT
	19	21	REST_HUMAN	REST		14	15	NONO_HUMAN	NONO		6	7	IGHA1_HUMAN	IGHA1
	16	21	BCLF1_HUMAN	BCLAF1		12	15	ROA2_HUMAN	HNRNPA2B1		4	7	HNRPK_HUMAN	HNRNPK
	19	19	HNRPM_HUMAN	HNRNPM		14	14	RUVB1_HUMAN	RUVBL1		6	6	RTCB_HUMAN	C22orf28
	16	18	SF3B3_HUMAN	SF3B3		14	14	DDX20_HUMAN	DDX20		6	6	SF3B3_HUMAN	SF3B3
	16	18	RU17_HUMAN	SNRNP70		14	14	DDX17_HUMAN	DDX17		6	6	EF1A1_HUMAN	EEF1A1
	15	18	SF3B1_HUMAN	SF3B1		12	14	IF4B_HUMAN	EIF4B		5	6	NONO_HUMAN	NONO
	13	18	TIF1B_HUMAN	TRIM28		11	14	TBB2A_HUMAN	TUBB2A		5	5	ACTA_HUMAN	ACTA2
	17	17	RN219_HUMAN	RNF219		13	13	RN219_HUMAN	RNF219		5	5	G3P_HUMAN	GAPDH
	16	17	AKP8L_HUMAN	AKAP8L		11	13	IPO8_HUMAN	IPO8		5	5	CAPR1_HUMAN	CAPRIN1
	14	17	RUVB1_HUMAN	RUVBL1		12	12	HNRPM_HUMAN	HNRNPM		5	5	XRCC6_HUMAN	XRCC6
	14	17	K1967_HUMAN	KIAA1967		12	12	RU17_HUMAN	SNRNP70		4	5	FUS_HUMAN	FUS
	15	16	SF3B2_HUMAN	SF3B2		11	12	HSP71_HUMAN	HSPA1A		4	5	ROA1_HUMAN	HNRNPA1
	14	15	PRKDC_HUMAN	PRKDC		11	11	GRP78_HUMAN	HSPA5		4	4	RA1L2_HUMAN	HNRNPA1L2
	13	15	HSP71_HUMAN	HSPA1A		11	11	AKAP8_HUMAN	AKAP8		4	4	PIP_HUMAN	PIP
	13	14	STRAP_HUMAN	STRAP		10	11	HNRPK_HUMAN	HNRNPK		4	4	KDM1A_HUMAN	KDM1A
	13	14	SFPQ_HUMAN	SFPQ		10	11	STK38_HUMAN	STK38		4	4	NFIL3_HUMAN	NFIL3
	12	14	HNRPK_HUMAN	HNRNPK		10	11	LMO7_HUMAN	LMO7		4	4	H12_HUMAN	HIST1H1C
	13	13	HNRPU_HUMAN	HNRNPU		9	11	BCLF1_HUMAN	BCLAF1		4	4	BLMH_HUMAN	BLMH
	13	13	MAP7_HUMAN	MAP7		10	10	TERA_HUMAN	VCP		4	4	DDX17_HUMAN	DDX17
	12	13	TCPB_HUMAN	CCT2		10	10	REST_HUMAN	REST		3	4	RL7_HUMAN	RPL7
	11	13	TCPG_HUMAN	CCT3		10	10	DDX1_HUMAN	DDX1		3	4	SF3A1_HUMAN	SF3A1
	12	12	DHX9_HUMAN	DHX9		10	10	DDX3X_HUMAN	DDX3X		3	4	PRDX2_HUMAN	PRDX2
	12	12	AKAP8_HUMAN	AKAP8		10	10	ZBTB1_HUMAN	ZBTB1		3	4	BCLF1_HUMAN	BCLAF1
	11	12	DNJA2_HUMAN	DNAJA2		9	10	PRKDC_HUMAN	PRKDC		3	4	DDX3X_HUMAN	DDX3X
	9	12	NPM_HUMAN	NPM1		9	9	HS71L_HUMAN	HSPA1L		3	3	ANXA2_HUMAN	ANXA2
	11	11	TCPA_HUMAN	TCP1		9	9	RTCB_HUMAN	C22orf28		3	3	ACTB_HUMAN	ACTB
	11	11	DDX1_HUMAN	DDX1		9	9	EF1A1_HUMAN	EEF1A1		3	3	THIO_HUMAN	TXN
	11	11	UBP7_HUMAN	USP7		9	9	MAP7_HUMAN	MAP7		3	3	E9PBV3_HUMAN	SBSN
	10	11	TCPQ_HUMAN	CCT8		9	9	SR140_HUMAN	U2SURP		3	3	GRP78_HUMAN	HSPA5
	10	11	EF1A1_HUMAN	EEF1A1		8	9	PLCB3_HUMAN	PLCB3		3	3	GGCT_HUMAN	GGCT
	10	10	MGAP_HUMAN	MGA		8	9	PRDX1_HUMAN	PRDX1		3	3	NAT10_HUMAN	NAT10
	9	10	HS71L_HUMAN	HSPA1L		8	9	EF2_HUMAN	EEF2		3	3	PRP31_HUMAN	PRPF31
	9	10	ROA2_HUMAN	HNRNPA2B1		5	9	TBB3_HUMAN	TUBB3		3	3	H11_HUMAN	HIST1H1A
	6	10	TBB3_HUMAN	TUBB3		8	8	HNRH1_HUMAN	HNRNPH1		3	3	RS8_HUMAN	RPS8
	6	10	TBB1_HUMAN	TUBB1		8	8	DHX15_HUMAN	DHX15		3	3	RS4X_HUMAN	RPS4X
	9	9	LMO7_HUMAN	LMO7		8	8	LMNA_HUMAN	LMNA		3	3	ENOA_HUMAN	ENO1
	9	9	U520_HUMAN	SNRNP200		8	8	SOGA2_HUMAN	SOGA2		3	3	PRDX1_HUMAN	PRDX1
	9	9	DDX17_HUMAN	DDX17		7	8	TIF1B_HUMAN	TRIM28		3	3	ANM5_HUMAN	PRMT5
	9	9	TOP2A_HUMAN	TOP2A		7	8	NPM_HUMAN	NPM1		3	3	IGHG1_HUMAN	IGHG1
	9	9	NUMA1_HUMAN	NUMA1		7	8	K1967_HUMAN	KIAA1967		3	3	AHNK_HUMAN	AHNAK
	9	9	RS4X_HUMAN	RPS4X		7	7	CATA_HUMAN	CAT		3	3	CHTOP_HUMAN	CHTOP
	8	9	IPO8_HUMAN	IPO8		7	7	ACTA_HUMAN	ACTA2		3	3	HSP72_HUMAN	HSPA2
	8	9	WIZ_HUMAN	WIZ		7	7	AKP8L_HUMAN	AKAP8L		3	3	H2B1A_HUMAN	HIST1H2BA
	8	9	PRP8_HUMAN	PRPF8		6	7	HSP72_HUMAN	HSPA2		3	3	PDIP3_HUMAN	POLDIP3
	7	9	VIME_HUMAN	VIM		6	7	ZA2G_HUMAN	AZGP1		2	3	RS3_HUMAN	RPS3
	6	9	ICLN_HUMAN	CLNS1A		5	7	TBB1_HUMAN	TUBB1		2	3	LYSC_HUMAN	LYZ
	8	8	RS3_HUMAN	RPS3		4	7	TCPB_HUMAN	CCT2		2	2	RL11_HUMAN	RPL11
	8	8	NFIL3_HUMAN	NFIL3		3	7	TBB5_HUMAN	TUBB		2	2	CDSN_HUMAN	CDSN
	8	8	NONO_HUMAN	NONO		6	6	DNJA2_HUMAN	DNAJA2		2	2	RL40_HUMAN	UBA52
	8	8	ACTA_HUMAN	ACTA2		6	6	STRAP_HUMAN	STRAP		2	2	H4_HUMAN	HIST1H4A
	8	8	PHAX_HUMAN	PHAX		6	6	PAWR_HUMAN	PAWR		2	2	RS2_HUMAN	RPS2
	8	8	SR140_HUMAN	U2SURP		6	6	SCRIB_HUMAN	SCRIB		2	2	ALDOA_HUMAN	ALDOA
	7	8	STK38_HUMAN	STK38		5	6	SMN_HUMAN	SMN1		2	2	TBB2A_HUMAN	TUBB2A
	7	8	TCPH_HUMAN	CCT7		5	6	PRDX2_HUMAN	PRDX2		2	2	HSP71_HUMAN	HSPA1A
	6	8	ZBTB1_HUMAN	ZBTB1		5	6	XRCC6_HUMAN	XRCC6		2	2	APOD_HUMAN	APOD
	6	8	RL6_HUMAN	RPL6		5	6	PRP8_HUMAN	PRPF8		2	2	DDX5_HUMAN	DDX5
	7	7	RIOK1_HUMAN	RIOK1		5	6	HUWE1_HUMAN	HUWE1		2	2	H31T_HUMAN	HIST3H3
	7	7	HNRH1_HUMAN	HNRNPH1		5	6	U520_HUMAN	SNRNP200		2	2	F263_HUMAN	PFKFB3
	7	7	DNJA1_HUMAN	DNAJA1		5	6	TOP1_HUMAN	TOP1		2	2	DHX15_HUMAN	DHX15
	7	7	TCPD_HUMAN	CCT4		5	5	SF3A1_HUMAN	SF3A1		2	2	RL18_HUMAN	RPL18
	7	7	CATA_HUMAN	CAT		5	5	MEP50_HUMAN	WDR77		2	2	HS71L_HUMAN	HSPA1L
	7	7	DDX3X_HUMAN	DDX3X		5	5	ZRAB2_HUMAN	ZRANB2		2	2	RL31_HUMAN	RPL31
	7	7	RTCB_HUMAN	C22orf28		5	5	HNRPF_HUMAN	HNRNPF		2	2	H2A1A_HUMAN	HIST1H2AA
	7	7	SRRT_HUMAN	SRRT		5	5	ICLN_HUMAN	CLNS1A		2	2	IGKC_HUMAN	IGKC
	7	7	PRDX1_HUMAN	PRDX1		5	5	KPYM_HUMAN	PKM		2	2	RS25_HUMAN	RPS25
	7	7	TRI29_HUMAN	TRIM29		5	5	NFIL3_HUMAN	NFIL3		2	2	FIP1_HUMAN	FIP1L1
	6	7	RCN1_HUMAN	RCN1		5	5	UBP7_HUMAN	USP7		2	2	A1AT_HUMAN	SERPINA1
	6	7	PLCB3_HUMAN	PLCB3		5	5	HSPB1_HUMAN	HSPB1		2	2	DDX21_HUMAN	DDX21
	6	7	SMN_HUMAN	SMN1		5	5	NADAP_HUMAN	SLC4A1AP		2	2	ERH_HUMAN	ERH
	6	7	CAMP3_HUMAN	CAMSAP3		5	5	ROA3_HUMAN	HNRNPA3		2	2	RFC4_HUMAN	RFC4
	6	7	RS7_HUMAN	RPS7		5	5	DDX5_HUMAN	DDX5		2	2	POF1B_HUMAN	POF1B
	6	7	PRS6A_HUMAN	PSMC3		5	5	RS4X_HUMAN	RPS4X		2	2	CO1A1_HUMAN	COL1A1
	5	7	TCPE_HUMAN	CCT5		4	5	DNJA1_HUMAN	DNAJA1		1	2	FA98B_HUMAN	FAM98B
	5	7	XRCC6_HUMAN	XRCC6		4	5	SRRT_HUMAN	SRRT		1	2	H1X_HUMAN	H1FX
	6	6	MEP50_HUMAN	WDR77		4	5	RIOK1_HUMAN	RIOK1		1	2	EWS_HUMAN	EWSR1
	6	6	RS2_HUMAN	RPS2		4	4	SET_HUMAN	SET		1	1	GSTP1_HUMAN	GSTP1
	6	6	K6PP_HUMAN	PFKP		4	4	ENOA_HUMAN	ENO1		1	1	TRY3_HUMAN	PRSS3
	6	6	LMNA_HUMAN	LMNA		4	4	RA1L2_HUMAN	HNRNPA1L2		1	1	DBPA_HUMAN	CSDA
	6	6	ZCH18_HUMAN	ZC3H18		4	4	FUS_HUMAN	FUS		1	1	RFC1_HUMAN	RFC1
	6	6	HSP72_HUMAN	HSPA2		4	4	G3P_HUMAN	GAPDH		1	1	RL14_HUMAN	RPL14
	6	6	TERA_HUMAN	VCP		4	4	THOC4_HUMAN	ALYREF		1	1	KV201_HUMAN	KV201
	6	6	TCPZ_HUMAN	CCT6A		4	4	PIP_HUMAN	PIP		1	1	IGLL5_HUMAN	IGLL5
	6	6	DHX15_HUMAN	DHX15		4	4	CAMP3_HUMAN	CAMSAP3		1	1	HSP7C_HUMAN	HSPA8
	5	6	TBB4A_HUMAN	TUBB4A		4	4	CAPR1_HUMAN	CAPRIN1		1	1	D6RBZ0_HUMAN	HNRNPAB
	5	6	SMD2_HUMAN	SNRPD2		4	4	DDX21_HUMAN	DDX21		1	1	HNRPD_HUMAN	HNRNPD
	5	6	BRCA1_HUMAN	BRCA1		4	4	DDX42_HUMAN	DDX42		1	1	RL21_HUMAN	RPL21
	5	6	ZA2G_HUMAN	AZGP1		4	4	SMD2_HUMAN	SNRPD2		1	1	PABP1_HUMAN	PABPC1
	4	6	ZKSC1_HUMAN	ZKSCAN1		4	4	NOP56_HUMAN	NOP56		1	1	RL22_HUMAN	RPL22
	4	6	DDB1_HUMAN	DDB1		4	4	RS3_HUMAN	RPS3		1	1	RL24_HUMAN	RPL24
	3	6	TBB5_HUMAN	TUBB		4	4	IGHA1_HUMAN	IGHA1		1	1	CD027_HUMAN	C4orf27
	5	5	RA1L2_HUMAN	HNRNPA1L2		4	4	SK2L2_HUMAN	SKIV2L2		1	1	RS14_HUMAN	RPS14
	5	5	SET_HUMAN	SET		3	4	KDM1A_HUMAN	KDM1A		1	1	RFC2_HUMAN	RFC2
	5	5	ZBT24_HUMAN	ZBTB24		3	4	RL40_HUMAN	UBA52		1	1	RS20_HUMAN	RPS20
	5	5	SF3A1_HUMAN	SF3A1		3	4	TBA4A_HUMAN	TUBA4A		1	1	PSB6_HUMAN	PSMB6
	5	5	CHTOP_HUMAN	CHTOP		2	4	CDSN_HUMAN	CDSN		1	1	RL15_HUMAN	RPL15
	5	5	ZCHC8_HUMAN	ZCCHC8		3	3	RCN1_HUMAN	RCN1		1	1	HSP76_HUMAN	HSPA6
	5	5	CDYL1_HUMAN	CDYL		3	3	ANXA2_HUMAN	ANXA2		1	1	COF1_HUMAN	CFL1
	5	5	DKC1_HUMAN	DKC1		3	3	RS8_HUMAN	RPS8		1	1	TBB3_HUMAN	TUBB3
	5	5	HSPB1_HUMAN	HSPB1		3	3	ZBT24_HUMAN	ZBTB24		1	1	CHD3_HUMAN	CHD3
	5	5	PLOD3_HUMAN	PLOD3		3	3	PRP6_HUMAN	PRPF6		1	1	RL8_HUMAN	RPL8
	5	5	EHMT2_HUMAN	EHMT2		3	3	TBB4A_HUMAN	TUBB4A		1	1	TOP1M_HUMAN	TOP1MT
	5	5	FBRL_HUMAN	FBL		3	3	RL11_HUMAN	RPL11		1	1	RS28_HUMAN	RPS28
	5	5	AHNK_HUMAN	AHNAK		3	3	IF6_HUMAN	EIF6		1	1	LMNA_HUMAN	LMNA
	4	5	SCRIB_HUMAN	SCRIB		3	3	THIO_HUMAN	TXN		1	1	BPIB1_HUMAN	BPIFB1
	4	5	HNRPF_HUMAN	HNRNPF		3	3	RL4_HUMAN	RPL4		1	1	B4DNN6_HUMAN	NXN
	4	5	PRDX2_HUMAN	PRDX2		3	3	PRP31_HUMAN	PRPF31		1	1	TPM1_HUMAN	TPM1
	4	5	PRS7_HUMAN	PSMC2		3	3	GGCT_HUMAN	GGCT		1	1	TERA_HUMAN	VCP
	4	4	GEMI6_HUMAN	GEMIN6		3	3	CLH1_HUMAN	CLTC		1	1	LAC2_HUMAN	IGLC2
	4	4	KDM1A_HUMAN	KDM1A		3	3	RL7_HUMAN	RPL7		1	1	PPGB_HUMAN	CTSA
	4	4	RS8_HUMAN	RPS8		3	3	K6PP_HUMAN	PFKP		1	1	ROA3_HUMAN	HNRNPA3
	4	4	PIP_HUMAN	PIP		3	3	IPO7_HUMAN	IPO7		1	1	GBP1_HUMAN	GBP1
	4	4	GT251_HUMAN	GLT25D1		3	3	OTUD4_HUMAN	OTUD4		1	1	RL27A_HUMAN	RPL27A
	4	4	FUS_HUMAN	FUS		3	3	TOP2A_HUMAN	TOP2A		1	1	HUTH_HUMAN	HAL
	4	4	PLOD1_HUMAN	PLOD1		3	3	POF1B_HUMAN	POF1B		1	1	ROA0_HUMAN	HNRNPA0
	4	4	RL4_HUMAN	RPL4		3	3	VIME_HUMAN	VIM		1	1	R13AX_HUMAN	R13AX
	4	4	PABP1_HUMAN	PABPC1		3	3	ZCH18_HUMAN	ZC3H18		1	1	FABP5_HUMAN	FABP5
	4	4	MDN1_HUMAN	MDN1		3	3	G3BP1_HUMAN	G3BP1		1	1	TGM4_HUMAN	TGM4
	4	4	PRP6_HUMAN	PRPF6		3	3	RS19_HUMAN	RPS19		1	1	NOP14_HUMAN	NOP14
	4	4	OTUD4_HUMAN	OTUD4		3	3	U5S1_HUMAN	EFTUD2		1	1	SPAT7_HUMAN	SPATA7
	4	4	IPO7_HUMAN	IPO7		3	3	KHDR1_HUMAN	KHDRBS1		1	1	RL27_HUMAN	RPL27
	4	4	RL7_HUMAN	RPL7		3	3	LYSC_HUMAN	LYZ		1	1	1433S_HUMAN	SFN
	4	4	G3BP1_HUMAN	G3BP1		3	3	MATR3_HUMAN	MATR3		1	1	RS16_HUMAN	RPS16
	4	4	SK2L2_HUMAN	SKIV2L2		3	3	AHNK_HUMAN	AHNAK		1	1	MUCL1_HUMAN	MUCL1
	4	4	NOP56_HUMAN	NOP56		3	3	FABP5_HUMAN	FABP5		1	1	RL3_HUMAN	RPL3
	4	4	U5S1_HUMAN	EFTUD2		3	3	TCPQ_HUMAN	CCT8		1	1	RUXE_HUMAN	SNRPE
	4	4	CAPR1_HUMAN	CAPRIN1		3	3	RS25_HUMAN	RPS25		1	1	TBA1A_HUMAN	TUBA1A
	4	4	E2F7_HUMAN	E2F7		3	3	TRI29_HUMAN	TRIM29		1	1	RL12_HUMAN	RPL12
	4	4	EIF3G_HUMAN	EIF3G		3	3	E2F7_HUMAN	E2F7		1	1	ARHGH_HUMAN	ARHGEF17
	4	4	WRIP1_HUMAN	WRNIP1		3	3	SYMPK_HUMAN	SYMPK		1	1	IGJ_HUMAN	IGJ
	4	4	PYR1_HUMAN	CAD		2	3	YBOX1_HUMAN	YBX1		1	1	PSMD6_HUMAN	PSMD6
	4	4	GEMI2_HUMAN	GEMIN2		2	3	RIF1_HUMAN	RIF1		1	1	SYAC_HUMAN	AARS
	4	4	ZRAB2_HUMAN	ZRANB2		2	3	CHTOP_HUMAN	CHTOP		1	1	S100P_HUMAN	S100P
	4	4	NADAP_HUMAN	SLC4A1AP		2	3	RS7_HUMAN	RPS7		1	1	CYTM_HUMAN	CST6
	4	4	SRRM2_HUMAN	SRRM2		2	3	FA98A_HUMAN	FAM98A		1	1	CHERP_HUMAN	CHERP
	4	4	PRS8_HUMAN	PSMC5		2	3	NAT10_HUMAN	NAT10		1	1	NUCL_HUMAN	NCL
	4	4	GEMI8_HUMAN	GEMIN8		1	3	WIT1_HUMAN	WT1-AS		1	1	LENG1_HUMAN	LENG1
	3	4	DYHC1_HUMAN	DYNC1H1		1	3	F8WAF8_HUMAN	ZNF140		1	1	RBMX_HUMAN	RBMX
	3	4	PAWR_HUMAN	PAWR		2	2	TBB6_HUMAN	TUBB6		1	1	H0YL33_HUMAN	ANXA2
	3	4	PRS4_HUMAN	PSMC1		2	2	GSTP1_HUMAN	GSTP1		1	1	CIRBP_HUMAN	CIRBP
	3	4	RO52_HUMAN	TRIM21		2	2	ROA1_HUMAN	HNRNPA1		1	1	RS18_HUMAN	RPS18
	3	4	LSM11_HUMAN	LSM11		2	2	GEMI6_HUMAN	GEMIN6		1	1	PRKDC_HUMAN	PRKDC
	3	4	IGHG1_HUMAN	IGHG1		2	2	ECM1_HUMAN	ECM1		1	1	ACL6A_HUMAN	ACTL6A
	3	4	NUCL_HUMAN	NCL		2	2	PSPC1_HUMAN	PSPC1
	2	4	ENOA_HUMAN	ENO1		2	2	SF3A3_HUMAN	SF3A3
	3	3	THOC4_HUMAN	ALYREF		2	2	PLOD1_HUMAN	PLOD1
	3	3	G3P_HUMAN	GAPDH		2	2	FIP1_HUMAN	FIP1L1
	3	3	2ABA_HUMAN	PPP2R2A		2	2	ACTB_HUMAN	ACTB
	3	3	DJB11_HUMAN	DNAJB11		2	2	RUXE_HUMAN	SNRPE
	3	3	RL11_HUMAN	RPL11		2	2	RS2_HUMAN	RPS2
	3	3	IMDH2_HUMAN	IMPDH2		2	2	DBPA_HUMAN	CSDA
	3	3	TBB6_HUMAN	TUBB6		2	2	ANXA1_HUMAN	ANXA1
	3	3	UBP15_HUMAN	USP15		2	2	RBMX_HUMAN	RBMX
	3	3	TBA4A_HUMAN	TUBA4A		2	2	BLMH_HUMAN	BLMH
	3	3	NCBP1_HUMAN	NCBP1		2	2	MGAP_HUMAN	MGA
	3	3	PAIRB_HUMAN	SERBP1		2	2	ZDBF2_HUMAN	ZDBF2
	3	3	ZN148_HUMAN	ZNF148		2	2	NS1BP_HUMAN	IVNS1ABP
	3	3	DBPA_HUMAN	CSDA		2	2	IMDH2_HUMAN	IMPDH2
	3	3	ANXA2_HUMAN	ANXA2		2	2	SMD1_HUMAN	SNRPD1
	3	3	RSMB_HUMAN	SNRPB		2	2	RS20_HUMAN	RPS20
	3	3	ACTB_HUMAN	ACTB		2	2	ERH_HUMAN	ERH
	3	3	F263_HUMAN	PFKFB3		2	2	NCRP1_HUMAN	NCCRP1
	3	3	RL24_HUMAN	RPL24		2	2	CHERP_HUMAN	CHERP
	3	3	ZDBF2_HUMAN	ZDBF2		2	2	SMD3_HUMAN	SNRPD3
	3	3	ROA0_HUMAN	HNRNPA0		2	2	TCPG_HUMAN	CCT3
	3	3	DDX5_HUMAN	DDX5		2	2	RS14_HUMAN	RPS14
	3	3	IGHA1_HUMAN	IGHA1		2	2	RL13_HUMAN	RPL13
	3	3	RIF1_HUMAN	RIF1		2	2	RS6_HUMAN	RPS6
	3	3	DDX23_HUMAN	DDX23		2	2	GAR1_HUMAN	GAR1
	3	3	RL31_HUMAN	RPL31		2	2	IGHG1_HUMAN	IGHG1
	3	3	RS19_HUMAN	RPS19		2	2	FA98B_HUMAN	FAM98B
	3	3	RL40_HUMAN	UBA52		2	2	ZCHC8_HUMAN	ZCCHC8
	3	3	CLH1_HUMAN	CLTC		2	2	RL15_HUMAN	RPL15
	3	3	GBLP_HUMAN	GNB2L1		2	2	CDYL1_HUMAN	CDYL
	3	3	ROA3_HUMAN	HNRNPA3		2	2	HUTH_HUMAN	HAL
	3	3	RU2A_HUMAN	SNRPA1		2	2	F263_HUMAN	PFKFB3
	3	3	MSH6_HUMAN	MSH6		2	2	LS14A_HUMAN	LSM14A
	3	3	CHERP_HUMAN	CHERP		2	2	P4HA1_HUMAN	P4HA1
	3	3	ZN295_HUMAN	ZNF295		2	2	RS16_HUMAN	RPS16
	3	3	PSMD3_HUMAN	PSMD3		2	2	RL8_HUMAN	RPL8
	3	3	EF2_HUMAN	EEF2		2	2	TCPZ_HUMAN	CCT6A
	3	3	ERH_HUMAN	ERH		2	2	DDX23_HUMAN	DDX23
	3	3	RS9_HUMAN	RPS9		2	2	GEMI8_HUMAN	GEMIN8
	3	3	HUTH_HUMAN	HAL		2	2	TKT_HUMAN	TKT
	3	3	BARD1_HUMAN	BARD1		2	2	RFC4_HUMAN	RFC4
	3	3	BLMH_HUMAN	BLMH		2	2	RSMB_HUMAN	SNRPB
	3	3	H90B3_HUMAN	HSP90AB3P		2	2	GBLP_HUMAN	GNB2L1
	3	3	SF3A3_HUMAN	SF3A3		2	2	RL31_HUMAN	RPL31
	2	3	YBOX1_HUMAN	YBX1		2	2	RS9_HUMAN	RPS9
	2	3	IF6_HUMAN	EIF6		2	2	SQSTM_HUMAN	SQSTM1
	2	3	PSPC1_HUMAN	PSPC1		2	2	CSTF3_HUMAN	CSTF3
	2	3	RRP12_HUMAN	RRP12		2	2	RUXGL_HUMAN	RUXGL
	2	3	RFC2_HUMAN	RFC2		2	2	H31T_HUMAN	HIST3H3
	2	3	KAP0_HUMAN	PRKAR1A		1	2	J3KS37_HUMAN	RECQL5
	2	2	PRP31_HUMAN	PRPF31		1	2	EWS_HUMAN	EWSR1
	2	2	ROA1_HUMAN	HNRNPA1		1	2	TBA1B_HUMAN	TUBA1B
	2	2	HS90B_HUMAN	HSP90AB1		1	2	DNJB2_HUMAN	DNAJB2
	2	2	EHMT1_HUMAN	EHMT1		1	2	PRS6A_HUMAN	PSMC3
	2	2	RL19_HUMAN	RPL19		1	2	J3QQU5_HUMAN	FLII
	2	2	CDSN_HUMAN	CDSN		1	2	G3PT_HUMAN	GAPDHS
	2	2	SMD1_HUMAN	SNRPD1		1	1	TRY1_HUMAN	PRSS1
	2	2	RS20_HUMAN	RPS20		1	1	PAIRB_HUMAN	SERBP1
	2	2	ANXA1_HUMAN	ANXA1		1	1	ZN579_HUMAN	ZNF579
	2	2	RUXE_HUMAN	SNRPE		1	1	RNPS1_HUMAN	RNPS1
	2	2	RBM39_HUMAN	RBM39		1	1	HS90A_HUMAN	HSP90AA1
	2	2	RS23_HUMAN	RPS23		1	1	TRY3_HUMAN	PRSS3
	2	2	CHAP1_HUMAN	CHAMP1		1	1	RL14_HUMAN	RPL14
	2	2	MCM3_HUMAN	MCM3		1	1	ALDOA_HUMAN	ALDOA
	2	2	THIO_HUMAN	TXN		1	1	D6RBZ0_HUMAN	HNRNPAB
	2	2	GNL3_HUMAN	GNL3		1	1	PM14_HUMAN	SF3B14
	2	2	CDC27_HUMAN	CDC27		1	1	H4_HUMAN	HIST1H4A
	2	2	RFC4_HUMAN	RFC4		1	1	PDCD6_HUMAN	PDCD6
	2	2	SQSTM_HUMAN	SQSTM1		1	1	GT251_HUMAN	GLT25D1
	2	2	TADBP_HUMAN	TARDBP		1	1	TPM1_HUMAN	TPM1
	2	2	RL15_HUMAN	RPL15		1	1	KV201_HUMAN	KV201
	2	2	RLA0L_HUMAN	RPLP0P6		1	1	WIZ_HUMAN	WIZ
	2	2	SMD3_HUMAN	SNRPD3		1	1	2ABA_HUMAN	PPP2R2A
	2	2	PRS10_HUMAN	PSMC6		1	1	RFC1_HUMAN	RFC1
	2	2	IGKC_HUMAN	IGKC		1	1	TBB4B_HUMAN	TUBB4B
	2	2	H4_HUMAN	HIST1H4A		1	1	IGKC_HUMAN	IGKC
	2	2	MCM7_HUMAN	MCM7		1	1	CASPC_HUMAN	CASP12
	2	2	RS28_HUMAN	RPS28		1	1	HNRPL_HUMAN	HNRNPL
	2	2	LS14A_HUMAN	LSM14A		1	1	E9PBV3_HUMAN	SBSN
	2	2	NS1BP_HUMAN	IVNS1ABP		1	1	H11_HUMAN	HIST1H1A
	2	2	SRSF3_HUMAN	SRSF3		1	1	MECR_HUMAN	MECR
	2	2	KHDR1_HUMAN	KHDRBS1		1	1	PTBP1_HUMAN	PTBP1
	2	2	NCRP1_HUMAN	NCCRP1		1	1	OTX1_HUMAN	OTX1
	2	2	CALU_HUMAN	CALU		1	1	XRCC5_HUMAN	XRCC5
	2	2	RS18_HUMAN	RPS18		1	1	CI114_HUMAN	C9orf114
	2	2	LTV1_HUMAN	LTV1		1	1	SKP1_HUMAN	SKP1
	2	2	TCPW_HUMAN	CCT6B		1	1	RL22_HUMAN	RPL22
	2	2	RL8_HUMAN	RPL8		1	1	CAN1_HUMAN	CAPN1
	2	2	RL13_HUMAN	RPL13		1	1	S10AE_HUMAN	S100A14
	2	2	FIP1_HUMAN	FIP1L1		1	1	DJB11_HUMAN	DNAJB11
	2	2	RS14_HUMAN	RPS14		1	1	SRSF3_HUMAN	SRSF3
	2	2	GAR1_HUMAN	GAR1		1	1	PSB6_HUMAN	PSMB6
	2	2	CIRBP_HUMAN	CIRBP		1	1	UBP15_HUMAN	USP15
	2	2	RL9_HUMAN	RPL9		1	1	DYH5_HUMAN	DNAH5
	2	2	TOP1_HUMAN	TOP1		1	1	HSP76_HUMAN	HSPA6
	2	2	SCAFB_HUMAN	SCAF11		1	1	GEMI2_HUMAN	GEMIN2
	2	2	XRCC5_HUMAN	XRCC5		1	1	NOP58_HUMAN	NOP58
	2	2	H12_HUMAN	HIST1H1C		1	1	CD027_HUMAN	C4orf27
	2	2	RS6_HUMAN	RPS6		1	1	HNRH3_HUMAN	HNRNPH3
	2	2	DDX42_HUMAN	DDX42		1	1	RS28_HUMAN	RPS28
	2	2	RL26L_HUMAN	RPL26L1		1	1	HS90B_HUMAN	HSP90AB1
	2	2	GTF2I_HUMAN	GTF2I		1	1	PDIP3_HUMAN	POLDIP3
	2	2	RL23_HUMAN	RPL23		1	1	ZN133_HUMAN	ZNF133
	2	2	NAT10_HUMAN	NAT10		1	1	H12_HUMAN	HIST1H1C
	2	2	RFA2_HUMAN	RPA2		1	1	RL24_HUMAN	RPL24
	2	2	RS16_HUMAN	RPS16		1	1	RL3_HUMAN	RPL3
	2	2	PDIP3_HUMAN	POLDIP3		1	1	DOK7_HUMAN	DOK7
	2	2	PM14_HUMAN	SF3B14		1	1	RBM39_HUMAN	RBM39
	2	2	SOGA1_HUMAN	SOGA1		1	1	ROA0_HUMAN	HNRNPA0
	2	2	CAPZB_HUMAN	CAPZB		1	1	SPF45_HUMAN	RBM17
	2	2	RL35A_HUMAN	RPL35A		1	1	MYH9_HUMAN	MYH9
	2	2	POF1B_HUMAN	POF1B		1	1	CHD3_HUMAN	CHD3
	2	2	EIF3C_HUMAN	EIF3C		1	1	FL2D_HUMAN	WTAP
	2	2	RL7A_HUMAN	RPL7A		1	1	PRS7_HUMAN	PSMC2
	2	2	RL28_HUMAN	RPL28		1	1	RS30_HUMAN	FAU
	2	2	RS25_HUMAN	RPS25		1	1	PPGB_HUMAN	CTSA
	2	2	CAZA1_HUMAN	CAPZA1		1	1	RL7A_HUMAN	RPL7A
	2	2	H31T_HUMAN	HIST3H3		1	1	TGM4_HUMAN	TGM4
	2	2	MYPN_HUMAN	MYPN		1	1	PSA7L_HUMAN	PSMA8
	2	2	RBBP4_HUMAN	RBBP4		1	1	IGJ_HUMAN	IGJ
	2	2	RBMX_HUMAN	RBMX		1	1	LDHA_HUMAN	LDHA
	2	2	KIF11_HUMAN	KIF11		1	1	SSF1_HUMAN	PPAN
	2	2	CNOT1_HUMAN	CNOT1		1	1	RS3A_HUMAN	RPS3A
	2	2	RL5_HUMAN	RPL5		1	1	MUCL1_HUMAN	MUCL1
	2	2	KPYM_HUMAN	PKM		1	1	EHMT2_HUMAN	EHMT2
	2	2	RUXGL_HUMAN	RUXGL		1	1	EIF3G_HUMAN	EIF3G
	2	2	RL35_HUMAN	RPL35		1	1	PSA6_HUMAN	PSMA6
	2	2	S10AE_HUMAN	S100A14		1	1	RL26L_HUMAN	RPL26L1
	2	2	RBM7_HUMAN	RBM7		1	1	MCM7_HUMAN	MCM7
	1	2	ZN579_HUMAN	ZNF579		1	1	CDC16_HUMAN	CDC16
	1	2	PSD12_HUMAN	PSMD12		1	1	SART3_HUMAN	SART3
	1	2	RS15A_HUMAN	RPS15A		1	1	H2A1A_HUMAN	HIST1H2AA
	1	2	FA98B_HUMAN	FAM98B		1	1	PRP19_HUMAN	PRPF19
	1	2	F8VS19_HUMAN	ZNF844		1	1	MSH6_HUMAN	MSH6
	1	1	TRY1_HUMAN	PRSS1		1	1	CPSF1_HUMAN	CPSF1
	1	1	SP1_HUMAN	SP1		1	1	SMRD1_HUMAN	SMARCD1
	1	1	RL10_HUMAN	RPL10		1	1	RL27A_HUMAN	RPL27A
	1	1	GSTP1_HUMAN	GSTP1		1	1	H2A1B_HUMAN	HIST1H2AB
	1	1	HS90A_HUMAN	HSP90AA1		1	1	PP6R1_HUMAN	PPP6R1
	1	1	TKT_HUMAN	TKT		1	1	RS26L_HUMAN	RPS26P11
	1	1	MK06_HUMAN	MAPK6		1	1	PYR1_HUMAN	CAD
	1	1	RL14_HUMAN	RPL14		1	1	GTF2I_HUMAN	GTF2I
	1	1	HNRPD_HUMAN	HNRNPD		1	1	PRS8_HUMAN	PSMC5
	1	1	TRY3_HUMAN	PRSS3		1	1	APOD_HUMAN	APOD
	1	1	ZBED5_HUMAN	ZBED5		1	1	HNRH2_HUMAN	HNRNPH2
	1	1	CDC16_HUMAN	CDC16		1	1	U2AF1_HUMAN	U2AF1
	1	1	GGCT_HUMAN	GGCT		1	1	EPIPL_HUMAN	EPPK1
	1	1	NCBP2_HUMAN	NCBP2		1	1	CBPA4_HUMAN	CPA4
	1	1	EIF3B_HUMAN	EIF3B		1	1	GBP1_HUMAN	GBP1
	1	1	RING1_HUMAN	RING1		1	1	1433Z_HUMAN	YWHAZ
	1	1	RL29_HUMAN	RPL29		1	1	H90B2_HUMAN	HSP90AB2P
	1	1	RL22_HUMAN	RPL22		1	1	ELAV1_HUMAN	ELAVL1
	1	1	RNPS1_HUMAN	RNPS1		1	1	TOPZ1_HUMAN	TOPAZ1
	1	1	RPAB3_HUMAN	POLR2H		1	1	HTSF1_HUMAN	HTATSF1
	1	1	PP6R3_HUMAN	PPP6R3		1	1	REQU_HUMAN	DPF2
	1	1	VTNC_HUMAN	VTN		1	1	WRIP1_HUMAN	WRNIP1
	1	1	TBA1B_HUMAN	TUBA1B		1	1	SPTB2_HUMAN	SPTBN1
	1	1	ZN630_HUMAN	ZNF630		1	1	CEP70_HUMAN	CEP70
	1	1	TPH1_HUMAN	TPH1		1	1	RL27_HUMAN	RPL27
	1	1	RSSA_HUMAN	RPSA		1	1	CD2B2_HUMAN	CD2BP2
	1	1	PRD10_HUMAN	PRDM10		1	1	CO1A1_HUMAN	COL1A1
	1	1	DNJA4_HUMAN	DNAJA4		1	1	PSB5_HUMAN	PSMB5
	1	1	H11_HUMAN	HIST1H1A		1	1	ASHWN_HUMAN	C2orf49
	1	1	RL21_HUMAN	RPL21		1	1	TADBP_HUMAN	TARDBP
	1	1	ELYS_HUMAN	AHCTF1		1	1	CYTM_HUMAN	CST6
	1	1	CE170_HUMAN	CEP170		1	1	R13AX_HUMAN	R13AX
	1	1	MIER1_HUMAN	MIER1		1	1	LONM_HUMAN	LONP1
	1	1	SKP1_HUMAN	SKP1		1	1	RL12_HUMAN	RPL12
	1	1	BAG3_HUMAN	BAG3		1	1	ACL6A_HUMAN	ACTL6A
	1	1	TBB4B_HUMAN	TUBB4B		1	1	CAZA1_HUMAN	CAPZA1
	1	1	CD2B2_HUMAN	CD2BP2		1	1	RO52_HUMAN	TRIM21
	1	1	ALDOA_HUMAN	ALDOA		1	1	PLOD3_HUMAN	PLOD3
	1	1	E9PBV3_HUMAN	SBSN		1	1	DKC1_HUMAN	DKC1
	1	1	CHM2A_HUMAN	CHMP2A		1	1	TOP1M_HUMAN	TOP1MT
	1	1	RIMS1_HUMAN	RIMS1		1	1	ZDH15_HUMAN	ZDHHC15
	1	1	HSP76_HUMAN	HSPA6		1	1	H90B3_HUMAN	HSP90AB3P
	1	1	LRRC1_HUMAN	LRRC1		1	1	HBB_HUMAN	HBB
	1	1	DNJB3_HUMAN	DNAJB3		1	1	RUXF_HUMAN	SNRPF
	1	1	TPM1_HUMAN	TPM1		1	1	GBB1_HUMAN	GNB1
	1	1	KV201_HUMAN	KV201		1	1	WDR27_HUMAN	WDR27
	1	1	RL3_HUMAN	RPL3		1	1	CPSF2_HUMAN	CPSF2
	1	1	DYH5_HUMAN	DNAH5		1	1	APC1_HUMAN	ANAPC1
	1	1	PP2AA_HUMAN	PPP2CA		1	1	S10AB_HUMAN	S100A11
	1	1	PSMD4_HUMAN	PSMD4		1	1	DYL1_HUMAN	DYNLL1
	1	1	RS30_HUMAN	FAU		1	1	LRC28_HUMAN	LRRC28
	1	1	PSMD1_HUMAN	PSMD1		1	1	F8VS19_HUMAN	ZNF844
	1	1	TSR1_HUMAN	TSR1		1	1	CO1A2_HUMAN	COL1A2
	1	1	CUL4A_HUMAN	CUL4A		1	1	DPOLB_HUMAN	POLB
	1	1	BYST_HUMAN	BYSL		1	1	MA7D1_HUMAN	MAP7D1
	1	1	LAC2_HUMAN	IGLC2		1	1	IL36G_HUMAN	IL36G
	1	1	CD027_HUMAN	C4orf27		1	1	RL28_HUMAN	RPL28
	1	1	EIF3I_HUMAN	EIF3I		1	1	MCM5_HUMAN	MCM5
	1	1	MLF2_HUMAN	MLF2		1	1	FA47E_HUMAN	FAM47E
	1	1	SPF45_HUMAN	RBM17		1	1	RECQ5_HUMAN	RECQL5
	1	1	PWP2_HUMAN	PWP2		1	1	CKLF4_HUMAN	CMTM4
	1	1	ANM1_HUMAN	PRMT1		1	1	APC7_HUMAN	ANAPC7
	1	1	H2A1A_HUMAN	HIST1H2AA		1	1	IAH1_HUMAN	IAH1
	1	1	RS26L_HUMAN	RPS26P11		1	1	COCA1_HUMAN	COL12A1
	1	1	H2B1B_HUMAN	HIST1H2BB		1	1	TBCEL_HUMAN	TBCEL
	1	1	PP6R1_HUMAN	PPP6R1		1	1	CALL3_HUMAN	CALML3
	1	1	RS10_HUMAN	RPS10		1	1	JAK1_HUMAN	JAK1
	1	1	ACL6A_HUMAN	ACTL6A
	1	1	IGLL5_HUMAN	IGLL5
	1	1	DNJB2_HUMAN	DNAJB2
	1	1	CDK1_HUMAN	CDK1
	1	1	NTPCR_HUMAN	NTPCR
	1	1	RT31_HUMAN	MRPS31
	1	1	RL27_HUMAN	RPL27
	1	1	TAB1_HUMAN	TAB1
	1	1	SIR1_HUMAN	SIRT1
	1	1	NOP14_HUMAN	NOP14
	1	1	RL23A_HUMAN	RPL23A
	1	1	RL12_HUMAN	RPL12
	1	1	RL27A_HUMAN	RPL27A
	1	1	EIF3D_HUMAN	EIF3D
	1	1	HBB_HUMAN	HBB
	1	1	R13AX_HUMAN	R13AX
	1	1	HS105_HUMAN	HSPH1
	1	1	HNRPQ_HUMAN	SYNCRIP
	1	1	MUCL1_HUMAN	MUCL1
	1	1	SART3_HUMAN	SART3
	1	1	PPGB_HUMAN	CTSA
	1	1	PRP19_HUMAN	PRPF19
	1	1	GBP1_HUMAN	GBP1
	1	1	PSB6_HUMAN	PSMB6
	1	1	MTA2_HUMAN	MTA2
	1	1	RBM4B_HUMAN	RBM4B
	1	1	CO1A1_HUMAN	COL1A1
	1	1	TYY1_HUMAN	YY1
	1	1	EWS_HUMAN	EWSR1
	1	1	TF3C2_HUMAN	GTF3C2
	1	1	FETUB_HUMAN	FETUB
	1	1	FABP5_HUMAN	FABP5
	1	1	AINX_HUMAN	INA
	1	1	ZN644_HUMAN	ZNF644
	1	1	HDAC1_HUMAN	HDAC1
	1	1	EIF3A_HUMAN	EIF3A
	1	1	KNG1_HUMAN	KNG1
	1	1	RBM27_HUMAN	RBM27
	1	1	ZN281_HUMAN	ZNF281
	1	1	NASP_HUMAN	NASP
	1	1	APOD_HUMAN	APOD
	1	1	GEMI7_HUMAN	GEMIN7
	1	1	AF10_HUMAN	MLLT10
	1	1	MCM5_HUMAN	MCM5
	1	1	ADRM1_HUMAN	ADRM1
	1	1	SNUT1_HUMAN	SART1
	1	1	SYAC_HUMAN	AARS
	1	1	SNPH_HUMAN	SNPH
	1	1	CDK9_HUMAN	CDK9
	1	1	SSF1_HUMAN	PPAN
	1	1	EIF3H_HUMAN	EIF3H
	1	1	RFC3_HUMAN	RFC3
	1	1	CDC73_HUMAN	CDC73
	1	1	UBP11_HUMAN	USP11
	1	1	LPIN3_HUMAN	LPIN3
	1	1	BUB3_HUMAN	BUB3
	1	1	H2A1B_HUMAN	HIST1H2AB
	1	1	SMC1A_HUMAN	SMC1A
	1	1	GBB1_HUMAN	GNB1
	1	1	MYL6B_HUMAN	MYL6B
	1	1	K7ES63_HUMAN	TUBB6
	1	1	XP32_HUMAN	XP32
	1	1	PDE8B_HUMAN	PDE8B
	1	1	LYSC_HUMAN	LYZ
	1	1	EBP2_HUMAN	EBNA1BP2
	1	1	LRRC7_HUMAN	LRRC7
	1	1	RS13_HUMAN	RPS13
	1	1	RLA0_HUMAN	RPLP0
	1	1	XIRP2_HUMAN	XIRP2
	1	1	RU2B_HUMAN	SNRPB2
	1	1	SRSF2_HUMAN	SRSF2
	1	1	HNRH3_HUMAN	HNRNPH3
	1	1	C9JGZ7_HUMAN	TLE6
	1	1	RFC1_HUMAN	RFC1
	1	1	MATR3_HUMAN	MATR3
	1	1	ZMYM3_HUMAN	ZMYM3
	1	1	TBCEL_HUMAN	TBCEL
	1	1	CSTF3_HUMAN	CSTF3
	1	1	KDM5B_HUMAN	KDM5B
	1	1	DOC11_HUMAN	DOCK11
	1	1	CSTF3_HUMAN	CSTF3
	1	1	KDM5B_HUMAN	KDM5B
	1	1	DOC11_HUMAN	DOCK11

## Sheet: Mouse testis rep1
Gene names	Uniprot ID	Description	Peptides mock	Peptides PRMD9	Sequence coverage [%]	MS/MS Count mock	MS/MS Count PRMD9	iBAQ mock	iBAQ PRMD9	iBAQ Rank difference	LFQ intensity mock	LFQ intensity PRMD9	LFQ Rank difference
Dock7	Q8R1A4	Dedicator of cytokinesis protein 7	35	92	56.9	21	341	127730	12034000	243	6484700	816500000	53
Myh9	Q8VDD5	Myosin-9	106	87	50.4	408	166	17757000	2507500	-7	632190000	191300000	-2
Myh11	E9QPE7	Myosin-11	100	84	48.9	306	101	10008000	1386300	-14	329510000	103650000	-3
Myh11	O08638	Myosin-11	98	82	46.6	7	2	51540	4286.8	-148	1702100	784760	-79
Mdn1	A2ANY6	Midasin	19	67	17.3	10	75	5819	56025	258	3685600	29186000	65
Myh10	Q61879	Myosin-10	84	65	48.7	145	35	2790900	348480	-64	90297000	28366000	-13
Plec	Q9QXS1-14	Isoform PLEC-1G of Plectin	111	60	30.5	151	18	196440	15629	-230	51115000	12254000	-28
Top2b	Q64511	DNA topoisomerase 2-beta	60	55	43.7	115	68	5008300	1341500	-9	143750000	73214000	-2
Top2a	Q01320	DNA topoisomerase 2-alpha	55	53	43.5	113	66	5712900	1812400	-6	146770000	86977000	-2
Prpf8	Q99PV0	Pre-mRNA-processing-splicing factor 8	48	50	31.9	72	66	245910	317370	70	14269000	28492000	7
Rpgrip1l	Q8CG73	Protein fantom	0	49	53.6	0	125	0	6504800	570	0	251910000	517
Snrnp200	Q6P4T2	U5 small nuclear ribonucleoprotein 200 kDa helicase	50	48	35.7	49	54	391360	366550	40	14975000	27953000	4
Numa1	E9Q7G0	Protein Numa1	37	45	34.1	52	70	159460	296400	111	7379300	24004000	25
Gemin5	Q8BX17	Gem-associated protein 5	1	41	37.9	0	80	2817.1	1060200	535	83197	57786000	434
Gemin5	A2AFQ9	Gem-associated protein 5	1	41	37.8	0	1	0	1161.8	25	0	177450	116
Dhx9	E9QNN1	ATP-dependent RNA helicase A	40	40	42.4	73	57	2796900	1158000	0	54925000	47510000	-4
Pdcd11	Q6NS46	Protein RRP5 homolog	47	39	36.1	76	26	1151600	249530	-68	33959000	17412000	-15
Parp1	Q921K2	Poly (ADP-ribose) polymerase family, member 1	42	36	48.1	126	38	11154000	1732400	-12	168920000	54916000	-8
Sf3b1	Q99NB9	Splicing factor 3B subunit 1	30	34	37.7	31	46	451970	628970	60	10462000	23662000	12
Golga3	P55937	Golgin subfamily A member 3	40	33	40.8	51	38	564340	224400	-33	13648000	12782000	-6
Eftud2	O08810	116 kDa U5 small nuclear ribonucleoprotein component	29	31	49.8	34	36	550730	528620	34	9364600	17099000	9
Nphp4	P59240	Nephrocystin-4	0	30	32.2	0	49	0	908200	546	0	35989000	504
Myo7a	P97479	Unconventional myosin-VIIa	44	30	30.1	97	20	529810	74420	-139	22449000	9827600	-28
Mybbp1a	Q7TPV4	Myb-binding protein 1A	34	29	38.2	62	27	899570	263070	-54	19538000	13231000	-13
Urb1	Q571H0	Nucleolar pre-ribosomal-associated protein 1	36	29	25.2	66	21	241450	75778	-64	9897000	7965800	-15
Dctn1	E9Q586	Dynactin subunit 1	1	27	35.3	0	41	3491.5	548770	501	70199	21364000	435
Prdm9	Q96EQ9	Histone-lysine N-methyltransferase PRDM9	1	24	35.1	0	90	4440.4	4139600	543	77937	62622000	441
Sf3b3	Q921M3	Splicing factor 3B subunit 3	18	24	29.8	28	35	422520	537590	57	7735800	17236000	18
Scml2	B1AVB1	Protein Scml2	24	24	50.3	77	45	5115100	1792100	-5	56144000	43935000	-7
Eml3	Q8VC03	Echinoderm microtubule-associated protein-like 3	0	23	38.4	0	58	0	2392100	564	0	44483000	506
Trim28	Q62318	Transcription intermediary factor 1-beta	14	23	50.4	16	56	313440	3538700	134	5983900	61385000	48
Dhx15	O35286	Putative pre-mRNA-splicing factor ATP-dependent RNA helicase DHX15	24	23	40.3	37	27	1126600	627880	2	8320500	9663700	-4
Ddx21	Q9JIK5	Nucleolar RNA helicase 2	32	23	47.1	73	37	2927400	647160	-27	41360000	18274000	-16
Scml2	B1AVB2	Protein Scml2	23	23	49.8	2	2	28902	7375.4	-40	343150	202210	-95
Map1b	P14873	Microtubule-associated protein 1B	27	22	18.6	38	17	90989	35802	-50	7855700	7070300	-15
Pelp1	Q9DBD5	Proline-, glutamic acid- and leucine-rich protein 1	10	21	33.7	10	80	186530	6690200	192	4156500	125920000	70
Scml2	B1AVB5	Protein Scml2	21	21	49.9	1	1	140520	68448	-17	2513900	1813000	-30
Nop56	Q9D6Z1	Nucleolar protein 56	31	21	66.6	72	20	5353600	606660	-41	26688000	7392700	-42
Myo1c	Q9WTI7	Unconventional myosin-Ic	28	21	38.5	35	14	819350	119190	-116	13582000	4699300	-49
Kdm2a	P59997	Lysine-specific demethylase 2A	0	20	23.9	0	45	0	424480	501	0	11195000	479
Mycbp2	F6SMY7	E3 ubiquitin-protein ligase MYCBP2 (Fragment)	20	20	6.5	23	21	12281	11333	61	2801600	4090800	14
Nol6	Q8R5K4	Nucleolar protein 6	22	20	29.7	34	20	861230	214320	-69	13665000	7351400	-28
Heatr1	G3X9B1	HEAT repeat containing 1	32	20	19.2	43	10	235020	47976	-128	8637200	4798500	-38
Smarca5	Q91ZW3	SWI/SNF-related matrix-associated actin-dependent regulator of chromatin subfamily A member 5	18	19	19.2	14	27	277220	275190	38	5119800	9516600	17
Spata5	Q3UMC0	Spermatogenesis-associated protein 5	17	19	35.7	25	25	259430	223510	32	3152900	4316600	10
Supt16h;Supt16	Q920B9	FACT complex subunit SPT16	28	19	37.6	42	18	1402700	209710	-95	23960000	8120500	-37
Wdr36	Q3TA68	Protein Wdr36	24	19	39.9	36	6	759550	133150	-103	6419100	2804500	-55
Gemin4	Q6P6L6	Gem (Nuclear organelle) associated protein 4	0	18	23.3	0	30	0	461150	507	0	12603000	483
Lrch3	Q8BVU0	Leucine-rich repeat and calponin homology domain-containing protein 3	2	18	38.9	0	45	14138	809110	470	156440	10640000	335
Las1l	A2BE28	Ribosomal biogenesis protein LAS1L	8	18	34.7	3	38	88508	902830	275	1304600	13001000	123
Hspa8	P63017	Heat shock cognate 71 kDa protein	17	18	37.3	39	28	1072400	1163500	32	4802700	14472000	38
Tbl3	Q8C4J7	Transducin beta-like protein 3	23	18	43.2	32	15	679010	136230	-94	5877000	3051700	-45
Znf638;Zfml	Q61464	Zinc finger protein 638	11	17	14.2	12	26	39143	155830	267	1878500	8956400	75
Sf3b2	Q3UJB0	Protein Sf3b2	16	17	30.3	17	23	327460	342560	48	5012700	9029500	18
Ddx17	Q501J6	Probable ATP-dependent RNA helicase DDX17	19	17	36.8	38	23	2714000	915770	-4	13686000	11681000	-12
Dync1h1	Q9JHU4	Cytoplasmic dynein 1 heavy chain 1	17	17	5.5	19	11	8924.3	7281.2	33	3010900	2946500	-12
Nat10	Q8K224	N-acetyltransferase 10	31	17	43.1	48	12	793960	142900	-94	12078000	6887200	-28
Lrch2	Q3UMG5	Leucine-rich repeat and calponin homology domain-containing protein 2	1	16	39.3	0	27	6133.3	427120	462	83303	6240900	377
Dsp	E9Q557	Desmoplakin	4	16	7.7	2	37	7097.7	107050	337	516750	4142300	170
Lrch2	Q3UMG5-2	Isoform 2 of Leucine-rich repeat and calponin homology domain-containing protein 2	1	16	40.6	0	2	0	9711.5	112	0	133240	91
Scaper	F8VQ70	Protein Scaper	14	16	17.8	16	22	101730	142010	120	2506900	5215700	34
Gm14569	E9Q0C6	Protein Gm14569	19	16	17.9	31	12	141120	71094	-13	4095700	4821300	-1
Hnrnpm	Q9D0E1	Heterogeneous nuclear ribonucleoprotein M	19	16	35.1	56	23	1550700	657070	-5	12490000	10556000	-9
Urb2	E9Q7L1	Protein Urb2	19	16	17.8	19	4	157980	62719	-47	3446300	3119700	-15
Trip12	G5E870	E3 ubiquitin-protein ligase TRIP12	18	16	12.6	28	16	129660	54440	-40	4226100	3677200	-16
Dnmt1	P13864	DNA (cytosine-5)-methyltransferase 1	20	16	19.4	23	17	138410	52949	-49	3611200	3139000	-17
Ddx5	Q61656	Probable ATP-dependent RNA helicase DDX5	18	16	34.9	18	11	1307900	446760	-28	6509100	5094900	-20
Jup	Q02257	Junction plakoglobin	11	15	30.2	2	45	107010	618140	222	1638000	7124000	78
Sf3a1	Q8K4Z5	Splicing factor 3A subunit 1	14	15	28.1	18	22	303290	403570	69	4629200	9961700	26
Rbm25	B2RY56	RNA-binding protein 25	13	15	28.3	9	22	577960	672780	49	6593200	13076000	20
Tuba1c	P68373	Tubulin alpha-1C chain	15	15	51.9	2	0	42225	14732	-22	148150	100980	-67
Thbs1	P35441	Thrombospondin-1	0	14	13.7	0	15	0	170420	432	0	7797200	466
Trim21	Q62191	E3 ubiquitin-protein ligase TRIM21	7	14	34.6	1	31	103780	4774600	272	528570	33946000	236
Tex10	Q3URQ0	Testis-expressed sequence 10 protein	8	14	20.7	2	21	50737	493580	312	700810	7557900	159
Hells	Q60848	Lymphocyte-specific helicase	6	14	24.1	4	19	57455	293870	256	859090	4491800	113
Wdr3	Q8BHB4	WD repeat-containing protein 3	25	14	44.2	36	5	651830	113380	-108	8058800	4219500	-41
Fxr1	Q61584-3	Isoform B of Fragile X mental retardation syndrome-related protein 1	26	14	51.4	59	21	2815300	431780	-51	15120000	6247100	-42
Utp20	Q5XG71	Small subunit processome component 20 homolog	26	14	12.1	38	3	57434	7322.6	-131	7348900	2459200	-70
Lrch1	P62046	Leucine-rich repeat and calponin homology domain-containing protein 1	1	13	26.1	0	21	1746.3	656910	524	15581	8466300	465
Qser1	A2BIE1	Protein Qser1	0	13	11.4	0	20	0	151330	422	0	4879900	443
Taf5	F8VPY2	Transcription initiation factor TFIID subunit 5	0	13	29	0	17	0	220720	448	0	3028200	414
Thoc2;BC005561	B1AZI6	THO complex subunit 2	8	13	10	8	14	47268	65942	137	1617800	2764700	28
Skiv2l2	Q9CZU3	Superkiller viralicidic activity 2-like 2	14	13	21.6	14	13	163810	100140	3	3034400	3804000	6
Hnrnpl	G5E924	Heterogeneous nuclear ribonucleoprotein L (Fragment)	13	13	36.9	23	18	1045500	534590	-3	3997000	3910000	-10
Fxr2	Q6P5B5	Fragile X mental retardation syndrome-related protein 2	17	13	34.4	25	9	1255900	225730	-80	8262600	3601300	-49
Ncl	P09405	Nucleolin	17	13	26.4	48	15	4120500	269930	-101	34491000	5421100	-58
Dkc1	Q9ESX5	H/ACA ribonucleoprotein complex subunit 4	23	13	57.8	45	15	3574300	388630	-61	17030000	4678200	-61
Acta2;Actg2	P62737	Actin, aortic smooth muscle	14	13	57	5	1	438970	42745	-207	1444300	301490	-191
Actr1a	P61164	Alpha-centractin	1	12	42.8	0	20	12587	1103700	484	42061	7101600	432
Senp3	Q9EP97	Sentrin-specific protease 3	6	12	31.2	4	21	88222	823950	273	712530	5657000	143
Matr3	Q8K310	Matrin-3	11	12	21.9	17	14	425950	384670	35	5107800	9118200	17
Puf60	Q3UEB3	Poly(U)-binding-splicing factor PUF60	12	12	36.7	19	17	1055900	881850	23	4242700	6813100	8
Hnrnph1	O35737	Heterogeneous nuclear ribonucleoprotein H	13	12	37.6	23	9	1896900	1146300	11	5549700	6884300	-2
Prpf19	Q99KP6	Pre-mRNA-processing factor 19	12	12	51	21	17	2436000	1105400	2	7658800	6929200	-14
Ubtf	P25976	Nucleolar transcription factor 1	15	12	25.9	34	11	1223700	232150	-77	6310200	3415900	-38
Glyr1	D3YYT1	Putative oxidoreductase GLYR1	18	12	51.6	36	13	1720000	278910	-73	7000000	2967900	-55
Ssrp1	Q08943	FACT complex subunit SSRP1	19	12	40	27	9	2032200	258750	-85	10989000	2744200	-77
Nphp1	Q9QY53	Nephrocystin-1	0	11	25.6	0	16	0	323620	481	0	5074200	445
Taf6	Q62311	Transcription initiation factor TFIID subunit 6	0	11	24.2	0	12	0	113560	390	0	1716400	383
Wdr18	Q4VBE8	WD repeat-containing protein 18	5	11	39	6	21	127650	2159000	235	632680	12864000	195
Pbrm1	Q8BSQ9	Protein polybromo-1	7	11	10.2	2	10	17372	33361	133	582310	1633100	97
Hnrnpk;Gm7964	P61979	Heterogeneous nuclear ribonucleoprotein K	11	11	36.1	11	9	603770	341010	-6	2193500	2686600	-2
Nvl	Q9DBY8	Nuclear valosin-containing protein-like	11	11	21.4	21	8	235700	93482	-40	2316700	2205600	-15
Srbd1	F8WGW3	S1 RNA-binding domain-containing protein 1	16	11	25.7	22	6	247450	94327	-45	4137700	3423900	-18
Rbm14	Q8C2Q3	RNA-binding protein 14	13	11	30.6	31	6	2976000	519020	-42	13030000	4268400	-51
Rai14	Q9EP71	Ankycorbin	20	11	29.4	27	4	279940	41288	-173	4829400	2314300	-53
Myh14	Q6URW6	Myosin-14	36	11	24.6	38	2	608210	69164	-166	23169000	5416600	-55
Wdr75	Q3U821	Protein Wdr75	16	11	26.9	19	4	366590	58691	-145	2757700	1219500	-64
Wdr43	Q6ZQL4	WD repeat-containing protein 43	11	11	26.7	16	9	387180	120940	-55	3285500	1239300	-74
Vim	P20152	Vimentin	23	11	58.6	49	8	3856500	179560	-127	21035000	2740800	-96
Kif11	Q6P9P6	Kinesin-like protein KIF11	0	10	15	0	11	0	51777	287	0	2114800	391
Actr1b	Q8R5C5	Beta-centractin	0	10	37	0	5	0	316950	478	0	1830300	387
Kiaa1429;1110037F02Rik	A2AIV2	Protein virilizer homolog	1	10	7.7	0	12	4831.4	41388	225	156060	2588600	261
C3	P01027	Complement C3	4	10	6.1	2	11	14507	348530	414	605960	27293000	213
Gapdh;Gm7293	P16858	Glyceraldehyde-3-phosphate dehydrogenase	8	10	41.4	9	22	524730	1691200	81	916900	5192200	117
Prpf6	Q91YR7	Pre-mRNA-processing factor 6	11	10	14.1	11	20	97685	107970	100	1932400	3198600	23
Rfc1	P35601	Replication factor C subunit 1	13	10	15.8	13	7	125000	52648	-38	2069100	2143300	-9
Mki67	E9PVX6	Protein Mki67	24	10	14.3	52	7	122120	13601	-181	5153900	2604400	-53
Sfpq	Q8VIJ6	Splicing factor, proline- and glutamine-rich	11	10	23.7	36	14	2299500	301660	-73	16767000	4955700	-54
Vcp	Q01853	Transitional endoplasmic reticulum ATPase	12	10	20.6	14	8	194180	60255	-74	1757100	957870	-59
Poldip3	Q8BG81	Polymerase delta-interacting protein 3	15	10	44.5	29	13	2317100	362560	-56	8883000	3248100	-59
Nop58	Q6DFW4	Nucleolar protein 58	17	10	43.5	49	8	3702300	224320	-110	13194000	3376600	-64
Mprip	P97434	Myosin phosphatase Rho-interacting protein	20	10	30.8	30	7	390280	47473	-180	7190100	2510200	-68
Mrto4	Q9D0I8	mRNA turnover protein 4 homolog	11	10	46.9	11	6	957910	442370	-13	980780	558670	-71
Top1	Q04750	DNA topoisomerase 1	18	10	27.6	55	14	1847200	137080	-131	15571000	3497500	-70
Mprip	Q5SWZ5	Myosin phosphatase Rho-interacting protein	20	10	14.1	1	0	816.27	0	9	102030	0	-132
Sptan1	E9Q447	Spectrin alpha chain, non-erythrocytic 1	52	10	27	72	3	120990	2669	-284	17020000	768190	-198
Poldip3	Q3UDD3	Polymerase delta-interacting protein 3	15	10	48.3	4	0	69555	0	-226	244040	0	-233
Dctn2	Q99KJ8	Dynactin subunit 2	1	9	32.1	0	14	6798.5	501850	470	22717	3276000	413
Vwa5a	Q99KC8	von Willebrand factor A domain-containing protein 5A	0	9	16.5	0	7	0	56372	295	0	950180	329
Ints6	Q6PCM2	Integrator complex subunit 6	2	9	15.4	1	12	12260	71061	267	228380	2142500	205
Eef1a1;Eef1a2	P10126	Elongation factor 1-alpha 1	9	9	30.1	12	21	996600	1860600	44	3521800	11918000	47
Myef2	Q8C854	Myelin expression factor 2	12	9	35.3	17	10	617230	329460	-12	2381200	3095800	5
Thrap3	Q569Z6	Thyroid hormone receptor-associated protein 3	10	9	12.8	27	10	562470	220340	-37	5921800	7219900	1
Cdc5l	Q6A068	Cell division cycle 5-like protein	12	9	24.1	15	10	252230	100670	-42	1729100	1732500	-2
Pabpc1;Pabpc6	P29341	Polyadenylate-binding protein 1	11	9	19.5	14	4	233300	100320	-30	1424400	1362600	-4
Capzb	P47757	F-actin-capping protein subunit beta	8	9	41.9	9	10	603130	289050	-20	523520	469420	-17
Lig3	P97386	DNA ligase 3	17	9	24.6	31	7	415000	46384	-192	5047900	1955600	-66
Myo1b	P46735	Unconventional myosin-Ib	24	9	30	35	3	435570	32111	-251	7951000	2056700	-85
Nol9	Q3TZX8	Polynucleotide 5'-hydroxyl-kinase NOL9	5	8	20.3	2	17	79725	338610	229	557000	2571700	128
Dnajc13	D4AFX7	Protein Dnajc13	10	8	5.9	4	12	20301	13551	43	617900	1100200	55
Aqr	Q8CFQ3	Intron-binding protein aquarius	5	8	8.5	4	9	33518	40547	109	865850	1645100	52
Sart1	Q9Z315	U4/U6.U5 tri-snRNP-associated protein 1	7	8	17.4	6	7	43284	65694	148	799010	1336400	48
Baz1b	Q9Z277	Tyrosine-protein kinase BAZ1B	6	8	8	7	9	31879	36392	100	954890	1676300	45
C4b	P01029	Complement C4-B	4	8	5.9	3	10	79547	379670	242	5661200	25906000	38
Ythdc2	B2RR83	Probable ATP-dependent RNA helicase YTHDC2	9	8	8.3	7	3	34760	21948	36	827810	1056600	20
Smu1	Q3UKJ7	WD40 repeat-containing protein SMU1	9	8	23.6	10	6	170150	86434	-12	649780	822810	13
Ilf2	Q9CXY6	Interleukin enhancer-binding factor 2	8	8	32.3	10	6	427910	278300	2	1376300	1707900	14
Hnrnpf	Q9Z2X1	Heterogeneous nuclear ribonucleoprotein F	10	8	42.7	12	7	1233100	578230	-9	2727900	3104900	0
Ddx3x;D1Pas1	Q62167	ATP-dependent RNA helicase DDX3X	10	8	22.7	12	8	153710	80883	-8	1088700	1101000	-10
Rfc2	Q9WUK4	Replication factor C subunit 2	9	8	40.7	13	5	259550	84336	-65	942190	617410	-58
Bop1	P97452	Ribosome biogenesis protein BOP1	12	8	28.4	26	6	468090	72435	-134	2990600	1315000	-59
Myl6	Q60605-2	Isoform Smooth muscle of Myosin light polypeptide 6	9	8	73.5	18	10	7311000	824920	-25	3840800	859030	-122
Sptbn1	Q62261	Spectrin beta chain, non-erythrocytic 1	46	8	28.9	67	1	108720	25121	-118	14017000	828560	-182
Znf629	Q6A085	Zinc finger protein 629	0	7	13.6	0	11	0	104490	376	0	2239500	396
Hnrnpul2	Q00PI9	Heterogeneous nuclear ribonucleoprotein U-like protein 2	4	7	12.8	3	4	43271	75672	168	645220	1481700	78
Thoc1	Q8R3N6	THO complex subunit 1	5	7	19	7	9	73080	124630	156	704410	1583500	69
Ddx41	Q91VN6	Probable ATP-dependent RNA helicase DDX41	8	7	16.9	6	7	122270	79255	24	666560	1374700	66
Rbbp4	Q60972	Histone-binding protein RBBP4	6	7	37.9	9	8	400250	492360	54	939030	2247000	65
Eif4a3;Gm8994	Q91VC3	Eukaryotic initiation factor 4A-III	9	7	23.4	10	5	173640	140850	39	593830	1130700	63
Mov10	P23249	Putative helicase MOV-10	8	7	11.9	7	7	58771	37075	22	1015900	1351000	24
Hnrnpc	Q9Z204	Heterogeneous nuclear ribonucleoproteins C1/C2	7	7	29.7	10	8	695290	376170	-9	1953500	2249700	-1
Bclaf1	Q8K019	Bcl-2-associated transcription factor 1	11	7	16.1	34	18	448540	142990	-52	3329200	3628300	-1
Hnrnpu	Q8VEK3	Heterogeneous nuclear ribonucleoprotein U	6	7	15.9	6	7	216560	143750	21	2488700	2808300	-3
Ddx3y	Q62095	ATP-dependent RNA helicase DDX3Y	8	7	16.6	2	0	9540.5	7553.7	37	104660	86853	-50
Capza2	P47754	F-actin-capping protein subunit alpha-2	9	7	53.8	19	8	851370	335210	-29	1378200	1262600	-11
Dhx30	Q99PU8	Putative ATP-dependent RNA helicase DHX30	11	7	12.1	11	3	83743	26418	-68	1762800	1571900	-16
Ranbp2	Q9ERU9	E3 SUMO-protein ligase RanBP2	18	7	8.5	27	3	14463	3092.6	-30	1762400	1446500	-19
U2af2	P26369	Splicing factor U2AF 65 kDa subunit	8	7	45.9	17	11	1938100	655800	-11	3408900	2941700	-21
Ptbp1	P17225	Polypyrimidine tract-binding protein 1	10	7	36.8	15	4	616070	219460	-48	1959800	1531300	-26
Myl12a	Q6ZWQ9	MCG5400	8	7	52.3	3	0	213450	54912	-100	100100	57458	-74
Rsl1d1	Q8BVY0	Ribosomal L1 domain-containing protein 1	11	7	40.5	23	6	1092200	161510	-96	2999100	1239600	-67
Myl12b	Q3THE2	Myosin regulatory light chain 12B	9	7	62.8	17	10	8540400	1431800	-12	4250400	1209800	-95
Utp15	Q8C7V3	U3 small nucleolar RNA-associated protein 15 homolog	11	7	28.8	14	4	471420	71317	-139	2115300	741770	-107
Ddx18	Q8K363	ATP-dependent RNA helicase DDX18	20	7	49.8	36	4	621570	45843	-229	3843400	899200	-118
Myl9	Q9CQ19	Myosin regulatory light polypeptide 9	8	7	62.2	5	6	2023100	410230	-44	999780	351860	-129
Ddx20	Q9JJY4	Probable ATP-dependent RNA helicase DDX20	0	6	11	0	9	0	106800	381	0	2183300	394
Zscan20	B2KFW1	Zinc finger and SCAN domain-containing protein 20	0	6	8.9	0	9	0	51200	284	0	1666500	380
Cttnbp2nl	Q99LJ0	CTTNBP2 N-terminal-like protein	0	6	16	0	7	0	65433	319	0	1144400	349
Dctn4	Q8CBY8	Dynactin subunit 4	1	6	19.6	0	6	4053.6	134590	381	16254	1054300	334
Taf2	Q8C176	Transcription initiation factor TFIID subunit 2	0	6	6.8	0	7	0	19429	175	0	756400	300
Dmrt1	Q9QZ59	Doublesex- and mab-3-related transcription factor 1	3	6	32.9	4	6	115020	369600	179	298890	1130100	133
Nxf1	Q99JX7	Nuclear RNA export factor 1	4	6	15.4	1	6	34588	65043	173	207990	656270	107
Ruvbl1	P60122	RuvB-like 1	6	6	18.9	4	7	67120	97733	135	242580	705910	100
Snrpd2;Gm5449	P62317	Small nuclear ribonucleoprotein Sm D2	6	6	49.2	5	7	345220	515310	72	168540	411080	79
Anxa2	P07356	Annexin A2	2	6	22.7	1	9	24806	113000	280	170340	326150	49
Cpsf1	Q9EPU4	Cleavage and polyadenylation specificity factor subunit 1	3	6	6	1	7	12439	22874	121	461240	847660	64
Mb21d2	Q8C525	Protein MB21D2	6	6	20.6	6	3	121690	106040	61	453800	809840	58
Ncbp1	Q3UYV9	Nuclear cap-binding protein subunit 1	4	6	10.1	3	5	44841	49311	103	413480	550380	19
Xlr3b;Xlr3a	Q6P205	X-linked lymphocyte-regulated protein 3B	8	6	50.9	2	2	16748	7494.5	3	13557	9868.4	-40
Xrn2	Q9DBR1	5'-3' exoribonuclease 2	6	6	8.8	7	1	51413	29996	2	760960	889130	7
Plrg1	Q922V4	Pleiotropic regulator 1	7	6	23.8	9	8	182630	93451	-15	871890	958540	4
Xlr3c	Q61806	X-linked lymphocyte-regulated protein 3C	9	6	50.9	10	5	392330	148690	-33	242630	286500	-16
Exosc10	P56960	Exosome component 10	8	6	24.3	8	5	97798	56525	11	1264000	1120100	-19
Ddx1	Q91VR5	ATP-dependent RNA helicase DDX1	9	6	18.9	13	3	151560	49072	-76	1031200	907960	-23
Mum1	Q6DID5	PWWP domain-containing protein MUM1	7	6	15.8	9	5	298820	68277	-105	1563400	1209700	-26
Rfc3	Q8R323	Replication factor C subunit 3	8	6	32.3	7	4	226260	78597	-54	712140	620420	-31
Srsf1	Q6PDM2	Serine/arginine-rich splicing factor 1	6	6	37.2	10	10	624010	298370	-23	459150	350900	-42
Pwp2	Q8BU03	Periodic tryptophan protein 2 homolog	13	6	22.9	18	4	288550	44995	-163	2973000	1464000	-49
Ercc3	P49135	TFIIH basal transcription factor complex helicase XPB subunit	9	6	17	11	0	123770	25903	-131	875970	596080	-58
Soga2	Q3UHU5	Microtubule cross-linking factor 1	10	6	8.2	12	1	11056	4180	-6	1160200	697460	-66
Myo6	E9Q17	Unconventional myosin-VI	18	6	22.4	25	2	219820	16132	-239	3577100	1387800	-66
Utp6	Q8VCY6	U3 small nucleolar RNA-associated protein 6 homolog	16	6	31.5	22	3	318080	31808	-225	1635300	842140	-68
Utp18	Q5SSI6	U3 small nucleolar RNA-associated protein 18 homolog	10	6	28.1	19	3	489740	72379	-138	2033300	919230	-75
Emg1	O35130	Ribosomal RNA small subunit methyltransferase NEP1	8	6	47.1	10	7	402410	130650	-55	328460	204870	-86
Fbl	P35550	rRNA 2'-O-methyltransferase fibrillarin	9	6	39.1	25	6	1971600	304780	-68	3762600	1278500	-79
Ddx27	Q921N6	Probable ATP-dependent RNA helicase DDX27	13	6	18.9	13	1	566960	22024	-302	4445000	1311400	-87
Tpm3;Tpm3-rs7	P21107-2	Isoform 2 of Tropomyosin alpha-3 chain	8	6	27.8	13	4	1172200	144240	-111	1437200	370910	-152
Myo6	E9Q3L1	Unconventional myosin-VI	18	6	23	1	0	11013	0	-47	217790	0	-220
Nek4	Q9Z1J2	Serine/threonine-protein kinase Nek4	0	5	12.5	0	7	0	57656	300	0	873890	319
Thoc5	Q8BKT7	THO complex subunit 5 homolog	5	5	8.5	3	3	53784	61625	100	302440	921670	113
Ran;Rasl2-9;1700009N14Rik	P62827	GTP-binding nuclear protein Ran	5	5	27.3	5	7	139080	212320	102	89364	218760	61
Upf1	Q9EPU0	Regulator of nonsense transcripts 1	4	5	6.1	1	6	14811	19109	95	320390	653030	61
Rbm15	Q0VBL3	Protein Rbm15	5	5	6.9	3	6	28125	50316	164	638640	1241400	65
Ppp1cc;Ppp1ca	P63087	Serine/threonine-protein phosphatase PP1-gamma catalytic subunit	9	5	34.7	4	0	51100	48198	75	102870	181740	27
Prpf3	Q922U1	U4/U6 small nuclear ribonucleoprotein Prp3	5	5	11.9	6	5	141580	48535	-69	584320	983240	52
Prpf4	Q9DAW6	U4/U6 small nuclear ribonucleoprotein Prp4	4	5	13.6	4	4	51390	42424	57	250190	422790	37
Nfix	P70257-1	Isoform NFIX1 of Nuclear factor 1 X-type	4	5	20.4	5	5	83509	90917	99	301290	527620	45
Nudt21	Q9CQF3	Cleavage and polyadenylation specificity factor subunit 5	4	5	24.7	4	3	159950	165130	67	134490	212420	19
LRWD1	Q8BUI3	Leucine-rich repeat and WD repeat-containing protein 1	5	5	13.7	5	1	98110	78292	55	461980	754440	46
Sf3a3	Q9D554	Splicing factor 3A subunit 3	4	5	16	7	5	156420	128130	42	631800	999100	46
Snrnp40	Q6PE01	U5 small nuclear ribonucleoprotein 40 kDa protein	7	5	32.1	10	7	283740	114840	-35	489890	742870	41
Usp7	Q6A4J8	Ubiquitin carboxyl-terminal hydrolase 7	7	5	8.4	5	4	38522	21663	23	663550	1007400	39
Frg1	P97376	Protein FRG1	4	5	24.8	4	5	172440	123460	26	121910	158670	-7
Ddx39b;Ddx39a	Q9Z1N5	Spliceosome RNA helicase Ddx39b	5	5	22.9	5	2	131370	65600	-15	351650	472190	17
Sycp3	M0QWF4	Synaptonemal complex protein 3	6	5	21.4	1	0	20581	8327.4	-2	15470	10182	-40
Pcbp1	P60335	Poly(rC)-binding protein 1	6	5	26.7	8	3	230290	110750	-15	600900	611510	-10
Prkra	Q9WTX2	Interferon-inducible double-stranded RNA-dependent protein kinase activator A	5	5	22	7	10	678920	361240	-10	506030	445970	-23
Cenpv	Q9CXS4	Centromere protein V	5	5	31.3	9	12	1376800	773320	5	1317300	1120400	-20
Bms1	Q6PGF5	BMS1 homolog, ribosome assembly protein (Yeast)	10	5	14.4	18	3	162650	36287	-133	1946500	1445300	-28
Mageb4	A2A9R3	Expressed sequence CN716893	6	5	17.3	12	4	438140	83925	-114	1891300	1306700	-35
Smc5	Q8CG46	Structural maintenance of chromosomes protein 5	9	5	10.2	8	7	56080	15410	-59	907550	678340	-41
Samd1	D3YXK1	Atherin	6	5	19.3	9	1	159820	30874	-154	498850	310280	-67
Ddx51	Q6P9R1	ATP-dependent RNA helicase DDX51	7	5	24.7	14	2	173020	35837	-143	1012800	606710	-68
Nol10	Q5RJG1	Nucleolar protein 10	8	5	22.4	14	1	198050	41025	-134	1225900	675280	-74
Npm1;Gm5611	Q61937	Nucleophosmin	5	5	28.8	17	5	1073400	199630	-87	1550800	736320	-81
Ppp1r12a	Q9DBR7	Protein phosphatase 1 regulatory subunit 12A	12	5	18.6	20	3	239210	21401	-225	3176400	1143300	-80
Nol11	Q8BJW5	Nucleolar protein 11	9	5	17.6	11	0	254760	28913	-215	1336300	603600	-95
Gtpbp4	Q99ME9	Nucleolar GTP-binding protein 1	13	5	28.7	18	3	410690	57619	-159	2650300	835820	-104
Wdr12	Q9JJA4	Ribosome biogenesis protein WDR12	7	5	27.9	8	2	350350	46466	-175	1047200	426820	-113
Fmr1	P35922	Fragile X mental retardation protein 1 homolog	11	5	29.2	20	5	512950	71523	-140	2809500	746700	-122
Sycp3	P70281	Synaptonemal complex protein 3	7	5	21.7	15	8	1476100	214070	-93	1103800	317610	-156
Ipo5	Q8BKC5	Importin-5	0	4	7.7	0	6	0	33142	216	0	1163300	351
Actr10	Q9QZB7	Actin-related protein 10	0	4	17.7	0	6	0	84171	352	0	659340	285
Zfp213	E9QAW0	Protein Zfp213	0	4	12	0	8	0	53316	290	0	452450	244
Ipo7	Q9EPL8	Importin-7	0	4	4.5	0	3	0	16495	159	0	442140	237
Zbtb7a	O88939	Zinc finger and BTB domain-containing protein 7A	0	4	16.4	0	4	0	84865	355	0	415490	230
Arhgef7	Q9ES28	Rho guanine nucleotide exchange factor 7	1	4	7.7	0	5	4619.5	25334	164	55864	378540	183
Dnaja1	P63037	DnaJ homolog subfamily A member 1	2	4	19.1	2	6	40699	172130	271	182000	1140600	190
Sin3a	Q60520	Paired amphipathic helix protein Sin3a	2	4	4.2	0	5	4660.9	22307	156	189050	627690	111
Ruvbl2	Q9WTM5	RuvB-like 2	3	4	11	2	3	19793	30070	112	89270	265010	87
Skp1	Q9WTX5	S-phase kinase-associated protein 1	4	4	20.9	3	4	138950	239000	117	82510	222610	73
Snrpd3	P62320	Small nuclear ribonucleoprotein Sm D3	3	4	45.2	7	8	591510	782670	52	274670	826190	106
Srsf10;Srsf12	Q9R0U0	Serine/arginine-rich splicing factor 10	3	4	24.7	3	3	140430	210260	100	77088	201860	67
Tra2b	P62996	Transformer-2 protein homolog beta	4	4	34	3	10	154770	499720	155	222450	555220	81
Cbx3	P23198	Chromobox protein homolog 3	4	4	21.3	2	4	150150	156110	73	51700	111850	43
Snrpa1	P57784	U2 small nuclear ribonucleoprotein A'	4	4	20	7	5	379040	343520	37	187870	354380	48
Hnrnpd	Q60668	Heterogeneous nuclear ribonucleoprotein D0	4	4	23.6	7	4	324810	285370	30	628520	979920	44
Dhrs4	Q99LB2	Dehydrogenase/reductase SDR family member 4	0	4	17.6	0	2	0	29810	202	0	42055	-8
Elavl1	P70372	ELAV-like protein 1	5	4	23	6	4	204620	138650	23	156500	241440	15
Srsf7	Q8BL97	Serine/arginine-rich splicing factor 7	4	4	28	6	5	690190	590980	20	489220	647500	26
	Q9DAM7	Transmembrane protein 263	4	4	53	4	4	869950	758610	24	307500	422400	15
Hsp90ab1	P11499	Heat shock protein HSP 90-beta	5	4	11.3	5	3	65346	41124	26	432030	533670	13
Pcbp2;Pcbp3	Q61990	Poly(rC)-binding protein 2	4	4	17.5	2	1	102400	70625	34	296740	358470	4
Luc7l2	Q7TNC4	Putative RNA-binding protein Luc7-like 2	4	4	17.3	6	3	108360	72911	30	290410	351840	2
Exosc3	Q7TQK4	Exosome complex component RRP40	6	4	38.3	5	1	260850	94534	-54	135290	152390	-23
Rfc5	Q9D0F6	Replication factor C subunit 5	6	4	27.4	9	5	165260	80315	-21	361050	446500	3
Rfc4	Q99J62	Replication factor C subunit 4	5	4	19	7	5	249500	118180	-17	654130	776240	6
Ddx24	Q9ESV0	ATP-dependent RNA helicase DDX24	6	4	10.7	7	1	58509	22595	-31	730750	819700	-3
Fus;Taf15	P56959	RNA-binding protein FUS	4	4	28.5	7	3	671740	288250	-32	800750	839550	-4
Srsf5	O35326	Serine/arginine-rich splicing factor 5	5	4	17.5	10	5	1153100	450220	-21	945570	938530	-6
Exosc9	Q9JHI7	Exosome complex component RRP45	7	4	20.8	6	5	209460	76426	-48	498920	460120	-14
Pura	P42669	Transcriptional activator protein Pur-alpha	5	4	27.1	11	6	942800	355470	-26	1164300	1024000	-19
Hnrnpul1	Q8VDM6	Heterogeneous nuclear ribonucleoprotein U-like protein 1	7	4	14.2	9	4	102870	46810	-26	801000	735020	-24
Ewsr1	Q61545	RNA-binding protein EWS	5	4	12.6	12	5	756110	254790	-47	2246800	1822200	-22
Ppp1cb	P62141	Serine/threonine-protein phosphatase PP1-beta catalytic subunit	11	4	44.6	27	2	520480	103310	-100	847190	703110	-33
Smarca1	Q6PGB8	Probable global transcription activator SNF2L1	5	4	5.7	1	0	4954.5	0	-18	66954	0	-95
Hist1h4a	P62806	Histone H4	4	4	40.8	6	5	2625200	719010	-14	1142500	770710	-53
Cebpz	P53569	CCAAT/enhancer-binding protein zeta	9	4	13.4	11	3	90009	15789	-119	1206300	780930	-56
Dnajc9	Q91WN1	DnaJ homolog subfamily C member 9	5	4	23.6	8	4	305650	104800	-55	211240	146650	-82
Eif6	O55135	Eukaryotic translation initiation factor 6	7	4	47.3	10	2	1182800	294680	-58	545050	319920	-74
Ddx50	Q99MJ9	ATP-dependent RNA helicase DDX50	7	4	13.2	8	1	110950	19819	-135	700260	422080	-74
Gtf2h4	O70422	General transcription factor IIH subunit 4	7	4	24.4	10	1	172250	36750	-134	565580	331440	-74
Cirh1a	Q8R2N2	Cirhin	8	4	15.9	11	0	259880	34828	-195	1179900	672860	-72
Bysl	O54825	Bystin	8	4	21.8	11	0	203580	33398	-169	664950	368510	-80
Aatf	Q9JKX4	Protein AATF	5	4	20.9	7	2	243340	56403	-111	979730	512400	-83
Rrp9	Q91WM3	U3 small nucleolar RNA-interacting protein 2	8	4	32	15	2	544470	57044	-183	1737300	783110	-82
Kif23	E9Q5G3	Kinesin-like protein KIF23	7	4	10.8	9	0	112860	9980.7	-196	1349300	603670	-95
Hist1h1a	P43275	Histone H1.1	5	4	24.4	8	6	2899000	605010	-31	1554500	618460	-101
Rcl1	Q9JJT0	RNA 3'-terminal phosphate cyclase-like protein	7	4	30.6	6	2	331080	60373	-132	1050400	449980	-106
Nhp2l1	Q9D0T1	NHP2-like protein 1	5	4	40.6	10	7	3154000	539210	-39	1432800	431790	-136
Alyref;Alyref2	O08583	THO complex subunit 4	5	4	35	9	4	1018200	167310	-88	510100	161380	-159
Xrcc1	Q60596	DNA repair protein XRCC1	5	4	11.7	6	2	146180	14053	-206	833790	213510	-181
Eno1	P17182	Alpha-enolase	0	3	12	0	15	0	148020	420	0	1350900	365
Strn3	Q9ERG2	Striatin-3	0	3	7.9	0	3	0	38244	241	0	374790	222
Wtap	Q9ER69	Pre-mRNA-splicing regulator WTAP	3	3	11.4	0	3	20252	64418	221	64044	448550	189
Zc3h18	Q0P678	Zinc finger CCCH domain-containing protein 18	2	3	7	0	5	3885	42067	234	153050	1000200	199
Ptrf	O54724	Polymerase I and transcript release factor	3	3	15.8	2	4	11942	47033	209	0	276320	172
Dctn3	Q9Z0Y1	Dynactin subunit 3	0	3	21.5	0	4	0	238740	455	0	246990	162
Gemin2	Q9CQQ4	Gem-associated protein 2	0	3	17.5	0	3	0	206760	439	0	233350	152
Akap8	Q9DBR0	A-kinase anchor protein 8	1	3	11.4	0	4	3823.1	61712	288	116620	557290	162
Hsf2	P38533-2	Isoform Beta of Heat shock factor protein 2	0	3	7.4	0	4	0	35318	227	0	219020	145
Dnaja2	Q9QYJ0	DnaJ homolog subfamily A member 2	2	3	10.2	1	3	34924	134990	259	183760	913940	166
Acin1	Q9JIX8	Apoptotic chromatin condensation inducer in the nucleus	2	3	3.1	0	3	2569.2	10745	109	95696	397390	139
Zfr	O88532	Zinc finger RNA-binding protein	2	3	6.1	1	4	5819.1	27385	160	178780	685420	133
	Q8VDP4	Cell cycle and apoptosis regulator protein 2	2	3	4.4	0	3	6152.2	13181	95	130640	391370	107
Smchd1	Q6P5D8	Structural maintenance of chromosomes flexible hinge domain-containing protein 1	1	3	2.5	0	4	2378.9	7061.5	68	148580	449290	107
Sf3b14	P59708	Splicing factor 3B subunit 6	3	3	32	5	2	194820	310630	95	80713	243130	88
Snrpe	P62305	Small nuclear ribonucleoprotein E	2	3	52.2	2	3	178200	478440	134	108310	308250	90
Magoh;Magohb	P61327	Protein mago nashi homolog	3	3	19.9	4	3	75553	125640	150	41023	120830	55
Dazl	Q64368	Deleted in azoospermia-like	4	3	20.8	5	3	175460	175030	60	224610	553390	78
Paxbp1	P58501	PAX3- and PAX7-binding protein 1	3	3	8.2	3	3	18241	17567	77	238680	501940	63
Dynll1;Dynll2	P63168	Dynein light chain 1, cytoplasmic	1	3	49.4	0	4	38315	237840	298	32586	90340	30
Snrpb2	Q9CQI7	U2 small nuclear ribonucleoprotein B''	3	3	19.1	2	2	62811	98868	148	37138	92168	31
Snrpa	Q62189	U1 small nuclear ribonucleoprotein A	3	3	13.4	2	6	148170	202340	86	84263	164120	30
Ppfibp1	Q8C8U0	Liprin-beta-1	3	3	4.9	1	3	17523	16255	73	190600	358480	47
Snrpb;Snrpn	P27048	Small nuclear ribonucleoprotein-associated protein B	2	3	15.6	2	8	104860	160030	129	157140	307490	42
Ppp2ca;Ppp2cb	P63330	Serine/threonine-protein phosphatase 2A catalytic subunit alpha isoform	0	3	15.2	0	2	0	36245	231	0	54543	11
Sf3b4	Q8QZY9	Splicing factor 3B subunit 4	3	3	14.4	5	3	156170	102130	15	330090	620710	54
Thoc6	Q5U4D9	THO complex subunit 6 homolog	1	3	25.4	2	3	23763	98890	264	31252	64822	6
Cherp	Q8CGZ0	Calcium homeostasis endoplasmic reticulum protein	3	3	6.1	5	1	34458	36331	90	412110	727850	50
Mfap1	Q9CQU1	Microfibrillar-associated protein 1	2	3	13.4	4	3	43789	62276	137	174710	295210	29
Dctn5	Q9QZB9	Dynactin subunit 5	0	3	19.2	0	2	0	85683	356	0	48352	0
Rpp30	O88796	Ribonuclease P protein subunit p30	5	3	26.9	5	0	91923	58698	23	65123	97411	6
Raly	Q64012	RNA-binding protein Raly	4	3	19.4	6	6	149370	123850	46	331830	531150	34
Phf5a	P83870	PHD finger-like domain-containing protein 5A	2	3	32.7	2	4	82310	93513	104	44697	63738	-9
Rbm17	Q8JZX4	Splicing factor 45	3	3	9.1	3	5	56314	38583	33	211480	316560	18
Wdr5	P61965	WD repeat-containing protein 5	3	3	11.4	4	4	121870	83535	30	229600	332790	16
Ilf3	Q9Z1X4	Interleukin enhancer-binding factor 3	3	3	6	5	3	80647	49146	23	587750	845880	33
Bcas2	Q9D287	Pre-mRNA-splicing factor SPF27	2	3	25.3	3	3	44492	70751	154	53143	66806	-12
Rbm4;Rbm14	F7BGR7	Protein Gm21992	7	3	24.5	4	3	63716	18691	-52	182450	252940	7
Usp9x	P70398	Probable ubiquitin carboxyl-terminal hydrolase FAF-X	1	3	1.9	2	3	877.88	1445.9	23	187360	264480	5
Exosc4	Q921I9	Exosome complex component RRP41	4	3	21.2	3	3	210550	114830	0	101040	105730	-18
Exosc5	Q9CRA8	Exosome complex component RRP46	4	3	32.8	5	4	144680	84570	8	86884	92628	-22
Xlr5b;Xlr5c;Xlr5a	A2BI50	Protein Xlr5b	3	3	14.8	5	6	198550	153370	38	139290	171560	-11
Ap2b1	Q9DBG3	AP-2 complex subunit beta	5	3	6.8	6	4	46195	29804	18	544670	657680	13
C1qc	Q02105	Complement C1q subcomponent subunit C	2	3	16.7	2	5	100260	658980	243	2300300	3294800	14
U2af1;U2af1l4	Q9D883	Splicing factor U2AF 35 kDa subunit	4	3	23.4	7	6	589320	318040	-7	788010	901850	8
Hnrnpr;Syncrip	Q8VHM5	Heterogeneous nuclear ribonucleoprotein R	3	3	6	6	4	62371	31824	-7	347660	425610	2
Rbmxl1;Rbmx	Q91VM5	RNA binding motif protein, X-linked-like-1	3	3	9	2	3	182750	105860	1	761080	866010	4
Luc7l	Q9CYI4	Putative RNA-binding protein Luc7-like 1	3	3	18.6	1	0	19133	7660.5	-3	31967	25003	-46
Cdc40	Q9DC48	Pre-mRNA-processing factor 17	3	3	7.4	2	2	25726	23822	78	197220	225350	-22
Exosc8	Q9D753	Exosome complex component RRP43	4	3	18.5	3	3	199140	90001	-27	129770	120170	-34
Phf8	Q80TJ7	Histone lysine demethylase PHF8	4	3	6.6	6	2	44935	17689	-12	540330	555900	-4
Tardbp	Q921F2	TAR DNA-binding protein 43	5	3	18.8	8	5	269820	102300	-49	507340	512790	-6
Nmt2	O70311	Glycylpeptide N-tetradecanoyltransferase 2	4	3	14.8	5	2	62444	40716	30	265220	304110	-16
D10Wsu52e	Q99LF4	tRNA-splicing ligase RtcB homolog	3	3	9.9	3	1	65790	34143	-9	255700	275550	-26
Exosc2	Q8VBV3	Exosome complex component RRP4	3	3	13.4	3	1	105030	47731	-26	75482	51263	-58
Ssb	P32067	Lupus La protein homolog	3	3	9.9	4	0	105500	49824	-19	389800	355740	-26
Tpm1	E9Q453	Tropomyosin alpha-1 chain	4	3	14.3	2	0	80786	7020.9	-181	53570	21069	-68
Rbm19	Q8R3C6	Probable RNA-binding protein 19	5	3	6.9	5	2	30532	7688.6	-40	414940	348560	-37
Kpna2	P52293	Importin subunit alpha-1	5	3	16.1	6	3	86897	39529	-21	309900	293340	-40
Nkrf	Q8BY02	NF-kappa-B-repressing factor	6	3	10.7	7	1	51809	11695	-77	305210	279980	-42
Hnrnpa0	Q9CX86	Heterogeneous nuclear ribonucleoprotein A0	3	3	18.7	4	3	250340	114860	-20	206280	167490	-65
Gm14692	A2BH01	Protein Gm1140	5	3	32.8	4	5	224890	69908	-70	154390	100120	-74
Srpk1	O70551	SRSF protein kinase 1	5	3	10.5	3	2	45138	16710	-18	261390	207480	-62
Nono	Q99K48	Non-POU domain-containing octamer-binding protein	8	3	27.5	18	0	534210	144880	-61	1756500	993070	-54
Srrm2	Q8BTI8	Serine/arginine repetitive matrix protein 2	3	3	2	3	1	2729.9	999.05	10	320050	225340	-71
Hspa5	P20029	78 kDa glucose-regulated protein	3	3	8.9	2	1	20195	18791	76	198750	123020	-90
Ddx31	Q6NZQ2	DEAD/H (Asp-Glu-Ala-Asp/His) box polypeptide 31	3	3	5.5	4	1	65406	17212	-62	368440	247620	-74
Tpm1	F8WID5	Tropomyosin alpha-1 chain	6	3	17.8	1	0	27940	0	-105	88692	0	-119
Nop2	E9QN31	Probable 28S rRNA (cytosine-C(5))-methyltransferase	11	3	18.9	19	3	539140	41264	-228	3078700	1149200	-76
Ap2a1	P17426	AP-2 complex subunit alpha-1	7	3	13.1	7	1	52482	6071.2	-137	715540	406630	-82
Grwd1	Q810D6	Glutamate-rich WD repeat-containing protein 1	8	3	33.4	11	4	364290	53674	-153	1030100	537570	-83
Gm8991;Hnrnpa3;Gm6793;Gm9242	Q8BG05	Heterogeneous nuclear ribonucleoprotein A3	7	3	33.7	10	2	420430	105220	-82	1031000	548980	-84
Mphosph10	Q810V0	U3 small nucleolar ribonucleoprotein protein MPP10	7	3	15.6	13	0	338370	34756	-217	2156300	892280	-84
Imp3	Q921Y2	U3 small nucleolar ribonucleoprotein protein IMP3	3	3	25	3	0	367340	107920	-64	211600	102290	-111
Gnl3	Q8CI11	Guanine nucleotide-binding protein-like 3	11	3	30.5	14	1	145840	18166	-180	665410	308630	-112
Noc4l	Q8BHY2	Nucleolar complex protein 4 homolog	9	3	22.1	12	0	269040	24640	-233	827660	338170	-112
	Q8C779	Uncharacterized protein CXorf57 homolog	10	3	17.2	13	2	127150	13483	-189	1060500	359100	-133
Dnttip2	Q8R2M2	Deoxynucleotidyltransferase terminal-interacting protein 2	4	3	10	7	2	137850	15609	-185	1122900	363470	-136
Lyar	Q08288	Cell growth-regulating nucleolar protein	5	3	25.8	5	3	375490	64224	-134	1066800	356010	-137
Ddx47	Q9CWX9	Probable ATP-dependent RNA helicase DDX47	9	3	34.4	11	0	722520	43471	-244	1772100	521240	-135
Hist1h2bp;Hist1h2bk;Hist1h2bc;Hist2h2bb;Hist1h2bh;Hist1h2bb;Hist1h2bm;Hist1h2bf;Gm13646;Hist3h2ba;Hist3h2bb;Hist2h2be	Q8CGP1	Histone H2B type 1-K	3	3	27	6	3	810910	648560	20	540020	186290	-146
Prkdc	P97313	DNA-dependent protein kinase catalytic subunit	14	3	4.6	19	0	8817.8	489.7	-28	1802000	394990	-167
Tmod3	Q9JHJ0	Tropomodulin-3	8	3	31.8	9	1	524650	34430	-255	1486400	293700	-196
Gsn	P13020	Gelsolin	12	3	25	18	0	342150	16127	-285	2162300	313720	-212
Tpm1	P58771	Tropomyosin alpha-1 chain	6	3	35	9	0	461640	5812.5	-404	536030	24236	-296
Mfap4	Q9D1H9	Microfibril-associated glycoprotein 4	0	2	17.1	0	7	0	2831800	566	0	5577200	451
Pon1	P52430	Serum paraoxonase/arylesterase 1	0	2	10.6	0	3	0	564680	521	0	1658800	379
C5	P06684	Complement C5	1	2	1.6	0	4	3401.9	39147	226	114870	2025800	285
Lrch4	Q921G6	Leucine-rich repeat and calponin homology domain-containing protein 4	0	2	6.2	0	3	0	51425	285	0	575270	269
Smn1	P97801	Survival motor neuron protein	0	2	10.8	0	3	0	276470	464	0	453470	245
Taf1	Q80UV9	Transcription initiation factor TFIID subunit 1	0	2	2.1	0	3	0	8211.7	95	0	447940	240
Sin3b	Q62141	Paired amphipathic helix protein Sin3b	0	2	3.7	0	2	0	8566	100	0	333480	205
Eps15	P42567	Epidermal growth factor receptor substrate 15	0	2	3.5	0	3	0	12353	130	0	323230	199
Strn	O55106	Striatin	0	2	6.1	0	2	0	14731	145	0	282050	175
Sp1	O89090	Transcription factor Sp1	1	2	5.5	0	4	31354	147110	288	110540	495850	154
Git1	Q68FF6	ARF GTPase-activating protein GIT1	0	2	3.3	0	2	0	13008	135	0	198870	133
Zc3h13	E9Q784	Protein Zc3h13	2	2	1.7	1	3	5028.2	8856.3	74	121400	464470	140
Aldoa;Aldoc	P05064	Fructose-bisphosphate aldolase A	0	2	20.3	0	2	0	62804	314	0	156990	101
Ubr5	Q80TP3	E3 ubiquitin-protein ligase UBR5	0	2	1	0	3	0	608.24	20	0	154050	100
Csnk2a1	Q60737	Casein kinase II subunit alpha	2	2	12	1	2	32754	35029	88	71445	232850	90
Kdm1a	Q6ZQ88	Lysine-specific histone demethylase 1A	0	2	4.7	0	1	0	5132.1	63	0	111360	76
Crip2	Q9DCT8	Cysteine-rich protein 2	1	2	23.1	0	2	35879	136200	257	22809	126040	76
Farsa	Q8C0C7	Phenylalanine--tRNA ligase alpha subunit	1	2	4.3	0	1	13522	22005	114	56481	179550	77
Ehmt2	Q9Z148	Histone-lysine N-methyltransferase EHMT2	1	2	2	0	2	813.9	6194.8	67	57542	185600	75
Dmrtb1	A2A9I7	Doublesex- and mab-3-related transcription factor B1	2	2	9.7	3	1	32015	43832	128	78694	216130	71
Rbm8a	Q9CWZ3	RNA-binding protein 8A	2	2	26	2	2	107200	242570	152	63441	168660	61
Zmym2	Q9CU65	Zinc finger MYM-type protein 2	2	2	3.1	1	2	1132.2	4543.1	53	56661	149510	55
Rbbp7	Q60973	Histone-binding protein RBBP7	3	2	10.8	1	1	40006	36529	74	82117	196980	55
Kif3a	P28741	Kinesin-like protein KIF3A	1	2	12.4	0	2	13961	39950	176	38712	103910	44
Tra2a	Q6PFR5	Transformer-2 protein homolog alpha	3	2	15.7	2	2	65790	51748	57	29999	91394	38
Pnn	O35691	Pinin	1	2	3.7	0	1	14242	15204	76	94529	196670	42
Prdx1	P35700	Peroxiredoxin-1	1	2	11.8	0	1	16144	58994	225	12135	72131	31
Polr2b	Q8CFI7	DNA-directed RNA polymerase II subunit RPB2	1	2	2.8	1	3	3624.5	6656.1	55	110720	210390	39
Gtf3c4	Q8BMQ2	General transcription factor 3C polypeptide 4	0	2	9.7	0	1	0	9550.2	111	0	67385	25
Zc3h11a	Q6NZF1	Zinc finger CCCH domain-containing protein 11A	2	2	3.9	1	2	9697.1	8800.6	53	139630	248140	38
Gata4	Q08369	Transcription factor GATA-4	4	2	16.8	4	2	85691	62345	47	114330	197660	29
Dctn6	Q9WUB4	Dynactin subunit 6	0	2	17.3	0	3	0	86644	358	0	57044	14
Hnrpdl	Q9Z130	Heterogeneous nuclear ribonucleoprotein D-like	3	2	10.6	3	1	27549	15479	36	53971	90855	14
Snrpd1	P62315	Small nuclear ribonucleoprotein Sm D1	1	2	27.7	0	2	68091	138230	174	95359	163180	18
Ncoa5	Q91W39	Nuclear receptor coactivator 5	3	2	13.4	2	3	110880	66478	13	192910	329990	32
Hdac1;Gm10093	O09106	Histone deacetylase 1	2	2	5.8	3	3	42229	33449	50	143030	234400	25
Plin1	Q8CGN5	Perilipin-1	3	2	11.2	4	0	49948	27354	1	138790	223950	24
Psma7;Psma8	Q9Z2U0	Proteasome subunit alpha type-7	0	2	13.3	0	2	0	36990	238	0	48706	1
Htatsf1	Q8BGC0	HIV Tat-specific factor 1 homolog	1	2	3.4	1	3	7064.1	13924	98	187140	305690	23
Luc7l3	Q5SUF2	Luc7-like protein 3	1	2	7.4	1	3	9736.1	31686	158	94956	132450	4
Cpsf6	Q6NVF9	Cleavage and polyadenylation specificity factor subunit 6	2	2	6.9	1	2	25323	17762	58	77257	103250	1
Bud31	Q6PGH1	Protein BUD31 homolog	2	2	30.1	2	1	100210	110930	96	29396	51741	-6
Rnf2	Q9CQJ4	E3 ubiquitin-protein ligase RING2	3	2	12.2	5	1	67732	44916	29	154260	235390	16
Cirbp	P60824	Cold-inducible RNA-binding protein	2	2	18.6	2	2	48504	58715	114	30036	53233	-7
Ywhaz	P63101	14-3-3 protein zeta/delta	2	2	13.1	3	2	28086	38300	124	23645	49521	-8
Prpf31	Q8CCF0	U4/U6 small nuclear ribonucleoprotein Prp31	3	2	12.8	5	1	68559	34897	-12	188110	298670	17
Csnk2b	P67871	Casein kinase II subunit beta	0	2	22.1	0	2	0	65073	318	0	36722	-13
Ppih	Q9D868	Peptidyl-prolyl cis-trans isomerase H	2	2	11.4	2	1	44801	42781	84	28567	44188	-16
Fkbp6	Q91XW8	Inactive peptidyl-prolyl cis-trans isomerase FKBP6	2	2	7	2	3	145700	111700	40	176480	244700	6
Gtl3	Q8BTU1	Cilia- and flagella-associated protein 20	2	2	11.9	2	1	37044	36141	76	24482	42010	-21
Khdrbs1	Q60749	KH domain-containing, RNA-binding, signal transduction-associated protein 1	2	2	7.7	6	2	603450	313470	-13	945920	1288500	25
Rbm4b	Q8VE92	RNA-binding protein 4B	3	2	9	2	1	17892	10267	32	56798	63672	-22
Gm773	Q3TML4	Gene model 773, (NCBI)	2	2	16	3	3	100380	73276	46	71298	81049	-23
Ik	Q9Z1M8	Protein Red	1	2	4.1	1	2	16548	20993	97	118780	135480	-14
Tmed10	Q9D1D4	Transmembrane emp24 domain-containing protein 10	3	2	18.3	5	1	71296	40191	7	36271	42752	-30
Tfip11	Q9ERA6	Tuftelin-interacting protein 11	1	2	2.6	1	2	6080.5	3143.3	5	57482	57911	-29
Cggbp1	Q8BHG9	CGG triplet repeat-binding protein 1	2	2	19.2	3	3	64542	41625	31	44627	47134	-32
Exosc6	Q8BTW3	Exosome complex component MTR3	3	2	18.3	4	3	152580	71324	-22	75998	79305	-30
Fhl1	P97447	Four and a half LIM domains protein 1	1	2	9.6	1	3	26551	32027	99	32279	35932	-36
Zc3h14	Q8BJ05	Zinc finger CCCH domain-containing protein 14	1	2	5.4	0	0	0	0	12	0	0	-39
Znf512	Q69Z99	Zinc finger protein 512	3	2	9.3	4	0	39302	19064	12	140360	166570	-18
Pno1	Q9CPS7	RNA-binding protein PNO1	3	2	18.5	3	0	90938	28509	-78	51767	43505	-39
Srsf3	P84104	Serine/arginine-rich splicing factor 3	2	2	18.5	2	0	314590	220400	13	145520	165830	-23
Smarcc1;Smarcc2	P97496	SWI/SNF complex subunit SMARCC1	2	2	2.2	1	2	14504	8757.2	27	229940	278160	-16
Xab2	Q9DCD2	Pre-mRNA-splicing factor SYF1	3	2	4.4	1	2	9853.3	2512.1	-20	77262	68101	-42
Purb	O35295	Transcriptional activator protein Pur-beta	2	2	16	2	4	323180	155490	-12	478700	464000	-7
Exosc1	Q9DAA6	Exosome complex component CSL4	3	2	20.5	3	0	93315	12320	-151	37624	21363	-55
Erh	P84089	Enhancer of rudimentary homolog	2	2	26.9	3	2	1539000	726530	0	403450	383150	-17
Ybx1	P62960	Nuclease-sensitive element-binding protein 1	3	2	18.9	7	1	114360	37444	-73	195110	197570	-40
Hnrnpab	Q99020	Heterogeneous nuclear ribonucleoprotein A/B	2	2	9.1	2	2	81393	48671	18	188570	194730	-41
Usp39	Q3TIX9	U4/U6.U5 tri-snRNP-associated protein 2	4	2	10.6	5	0	49108	20153	-14	222360	221110	-37
Cav1	P49817	Caveolin-1	2	2	19.7	2	0	98369	32657	-75	57200	30391	-65
Rbm39	Q8VH51	RNA-binding protein 39	4	2	17	7	2	130310	49466	-52	336590	326610	-26
Eif2s3y	Q9Z0N2	Eukaryotic translation initiation factor 2 subunit 3, Y-linked	4	2	13.8	1	0	14859	0	-66	49650	0	-71
Orc1	Q9Z1N2	Origin recognition complex subunit 1	3	2	5.1	4	2	34916	14944	1	332920	315210	-31
Nop16	Q9CPT5	Nucleolar protein 16	2	2	10.1	2	2	105950	28639	-103	61495	26700	-73
Fam98a	Q3TJZ6	Protein FAM98A	3	2	9.3	7	0	50211	8379.3	-101	145040	110810	-55
Slit3	Q9WVB4	Slit homolog 3 protein	5	2	4.3	5	0	17864	2747	-51	287230	255300	-40
Orc5	Q9WUV0	Origin recognition complex subunit 5	5	2	17	5	2	102460	27340	-100	342380	308650	-39
Rrp8	Q9DB85	Ribosomal RNA-processing protein 8	4	2	12	5	0	46492	12960	-50	162710	125230	-64
Actn1;Actn4	Q7TPR4	Alpha-actinin-1	4	2	5.9	5	1	30018	8994.9	-18	293610	240330	-51
C1qb	P14106	Complement C1q subcomponent subunit B	2	2	8.3	2	4	64378	43788	40	120730	69785	-79
Phf14	Q9D4H9	PHD finger protein 14	1	2	2.7	1	0	10786	3221.6	-11	124430	71963	-79
Nol8	Q3UHX0	Nucleolar protein 8	5	2	6.7	7	0	47322	7217.5	-106	664330	493180	-47
	Q9CXL3	Uncharacterized protein C7orf50 homolog	2	2	26.2	3	2	272490	131030	-21	188880	148060	-71
Eif2s3x	Q9Z0N1	Eukaryotic translation initiation factor 2 subunit 3, X-linked	4	2	13.8	6	0	87134	15630	-113	231450	181400	-70
Orc3	Q9JK30	Origin recognition complex subunit 3	3	2	4.8	4	0	31759	9912.6	-18	211740	163570	-74
H1fx	Q80ZM5	H1 histone family, member X	2	2	11.7	3	1	241770	82084	-57	146670	84141	-90
Vapb;Vapa	Q9QY76	Vesicle-associated membrane protein-associated protein B	2	2	10.7	2	0	128830	30790	-123	111720	43450	-106
Mgst1	Q91VS7	Microsomal glutathione S-transferase 1	2	2	18.7	3	2	365130	78619	-100	106280	36250	-111
Dhx37	Q6NZL1	DEAH (Asp-Glu-Ala-His) box polypeptide 37	4	2	6.1	4	0	26261	3758.8	-62	360810	236140	-80
Coil	Q5SU73	Coilin	2	2	4	4	0	57756	11296	-91	129520	51261	-108
Toe1	Q9D2E2	Target of EGR1 protein 1	4	2	14.5	6	0	75002	19426	-73	273650	179270	-85
Xlr4b;Xlr4a;Xlr4c	Q9JJQ7	Protein Xlr4b	2	2	16.2	2	2	658350	204350	-60	187140	99282	-99
Nhp2	Q9CRB2	H/ACA ribonucleoprotein complex subunit 2	3	2	36.6	4	4	2254900	469670	-38	682850	364470	-84
Pwp1	Q99LL5	Periodic tryptophan protein 1 homolog	5	2	17.4	7	1	163020	25848	-174	577190	310500	-86
Hist1h2al;Hist1h2ah;H2afj;Hist1h2aa;Hist2h2ac;Hist1h2ak;Hist1h2af;Hist3h2a;Hist2h2aa1;Hist1h2ab;H2afz;H2afv;Hist2h2ab;H2afx	Q8BFU2	Histone H2A type 3	2	2	22.4	9	6	3822300	970880	-13	1388200	645580	-90
Hist1h1e	P43274	Histone H1.4	3	2	17.8	2	0	244290	19210	-235	129750	39994	-125
Ftsj3	Q9DBE9	pre-rRNA processing protein FTSJ3	2	2	4.7	3	1	28772	8529.8	-23	328630	193810	-99
Hnrnpa1	P49312	Heterogeneous nuclear ribonucleoprotein A1	2	2	9.4	3	0	75265	15228	-99	129370	36126	-127
Nle1	Q8VEJ4	Notchless protein homolog 1	4	2	11.3	4	0	90235	17076	-113	315030	180550	-100
Hist1h1c;Hist1h1d	P15864	Histone H1.2	3	2	18.4	4	1	806270	165130	-79	573060	256770	-111
Rrp7a	Q9D1C9	Ribosomal RNA-processing protein 7 homolog A	5	2	29.3	6	0	250080	29980	-209	621590	283120	-111
Des	P31001	Desmin	11	2	29.6	9	0	108990	23098	-122	643650	294370	-113
Krr1	Q8BGA5	KRR1 small subunit processome component homolog	4	2	17.3	4	0	215580	34509	-172	565020	238770	-119
Racgap1	Q9WVM1	Rac GTPase-activating protein 1	6	2	15.8	11	0	97708	7885.1	-194	494010	209080	-120
Pes1	Q9EQ61	Pescadillo homolog	5	2	10.3	5	0	93766	7660.8	-194	356810	143600	-140
Hp1bp3	Q3TEA8	Heterochromatin protein 1-binding protein 3	6	2	15.2	10	2	211300	30105	-186	1030200	335810	-139
Ylpm1	D3YWX2	YLP motif-containing protein 1	2	2	1.2	4	0	2989.8	407.9	1	260740	67986	-172
Mak16	Q8BGS0	Protein MAK16 homolog	6	2	29.3	10	0	662880	46695	-230	1202500	309430	-168
Svil	Q8K4L3	Supervillin	9	2	7	12	0	36226	2864.7	-115	1028300	197060	-214
Ahnak	E9Q616	Protein Ahnak	10	2	7.3	10	1	5963	251.48	-21	2129900	217600	-261
Ddx52	Q8K301	Probable ATP-dependent RNA helicase DDX52	10	2	24.6	15	0	264760	11716	-293	1328700	127960	-278
Ddx10	Q80Y44	Probable ATP-dependent RNA helicase DDX10	11	2	21	17	0	121130	3821.1	-267	1855600	116390	-314
Dock8	Q8C147	Dedicator of cytokinesis protein 8	1	2	1.9	2	0	88832	0	-260	1626800	0	-420
Dsg1c;Dsg1a;Dsg1b	Q7TSF0	Desmoglein-1-gamma	1	1	5.9	2	1	41342	7732	-75	0	98422	61
Azi1	Q62036	Centrosomal protein of 131 kDa	2	1	2.8	2	0	5661.1	2967.3	6	64242	161340	50
Snw1	Q9CSN1	SNW domain-containing protein 1	2	1	5.4	2	0	19039	9944.9	26	63883	96788	8
Rbpj	P31266	Recombining binding protein suppressor of hairless	2	1	5.6	1	1	31807	8811.5	-29	66257	81164	-16
Setx	A2AKX3	Probable helicase senataxin	2	1	1.6	1	0	434.96	242.6	15	50891	54878	-21
	Q9CQE8	UPF0568 protein C14orf166 homolog	2	1	9.4	3	1	32520	11091	-14	21542	25233	-34
Tmpo	Q61033	Lamina-associated polypeptide 2, isoforms alpha/zeta	2	1	3.9	4	0	13282	3481.7	-18	98085	98781	-27
Rangap1	P46061	Ran GTPase-activating protein 1	2	1	3.9	2	1	20509	6015.2	-30	89814	91708	-30
Kank2	Q8BX02	KN motif and ankyrin repeat domain-containing protein 2	2	1	3.3	2	1	16357	3900.7	-27	157180	197460	-16
Polr2e	Q80UW8	DNA-directed RNA polymerases I, II, and III subunit RPABC1	2	1	11	4	1	37004	12387	-22	18622	17729	-42
Trim25	Q61510	E3 ubiquitin/ISG15 ligase TRIM25	2	1	5.9	2	0	29864	7040.1	-50	75853	69892	-36
2610020H08Rik	D3YW29	Protein 2610020H08Rik	2	1	6.7	3	0	25779	4705.7	-49	89040	86701	-36
Myl6b	Q8CI43	Myosin light chain 6B	3	1	19.3	2	0	21579	0	-88	17468	0	-45
Rsl24d1;Khdc3	Q99L28	Probable ribosome biogenesis protein RLP24	2	1	16.6	2	0	178850	61858	-66	34843	29793	-44
Vdac3	Q60931	Voltage-dependent anion-selective channel protein 3	2	1	8.5	3	1	45440	10672	-60	31299	19535	-51
Srrm1	Q52KI8	Serine/arginine repetitive matrix protein 1	2	1	3.5	3	0	21373	944.37	-77	269920	306080	-15
Hnrnpa2b1	O88569	Heterogeneous nuclear ribonucleoproteins A2/B1	2	1	10.3	3	0	49552	36792	45	129820	112000	-38
Cdkn2aip	Q8BI72	CDKN2A-interacting protein	4	1	11	5	0	35273	4470.7	-91	130130	105150	-45
Eif2s1	Q6ZWX6	Eukaryotic translation initiation factor 2 subunit 1	3	1	17.5	5	1	47332	6263.9	-117	104580	83790	-54
Pak1ip1	Q9DCE5	p21-activated protein kinase-interacting protein 1	1	1	9.9	1	1	11254	8794.9	41	43245	0	-68
Srsf9	Q9D0B0	Serine/arginine-rich splicing factor 9	2	1	10.4	2	2	85357	7985.6	-172	57814	27482	-71
Ddx49	Q4FZF3	Probable ATP-dependent RNA helicase DDX49	2	1	5.6	2	0	23451	4405.1	-45	87708	51546	-72
Ccdc137	Q8R0K4	Coiled-coil domain-containing protein 137	2	1	9.7	2	0	45599	6331.1	-108	54433	13235	-75
Prc1	Q99K43	Protein regulator of cytokinesis 1	5	1	16	2	0	37587	7170.3	-76	128330	87170	-64
Dimt1	Q9D0D4	Probable dimethyladenosine transferase	3	1	14.4	4	0	64416	4660.6	-162	56975	17955	-78
	Q8CIL4	Uncharacterized protein C1orf131 homolog	3	1	14.6	2	0	56818	9818.3	-99	102000	62408	-73
Ap2m1	P84091	AP-2 complex subunit mu	3	1	11.8	4	0	67682	14373	-90	219730	196250	-56
Rpf2	Q9JJ80	Ribosome production factor 2 homolog	3	1	15.6	3	0	119380	10194	-198	69022	25316	-83
Utp11l	Q9CZJ1	Probable U3 small nucleolar RNA-associated protein 11	2	1	10.3	3	0	130680	17128	-171	67838	23831	-86
Orc2	Q60862	Origin recognition complex subunit 2	3	1	9.3	4	2	42712	11339	-44	175210	128230	-66
Clasp2	Q8BRT1	CLIP-associating protein 2	2	1	1.9	1	0	5612	1788.8	-5	136880	84480	-80
Hist1h1b	P43276	Histone H1.5	2	1	12.1	3	0	123820	6405.7	-251	72281	20056	-94
Caprin2	Q05A80	Caprin-2	2	1	3.6	2	0	19446	3432.1	-44	157610	100390	-81
Surf6	P70279	Surfeit locus protein 6	2	1	10.1	2	1	93617	12786	-148	155710	94060	-84
Kat7	Q5SVQ0	Histone acetyltransferase KAT7	2	1	6.7	1	1	13806	8887.5	39	74978	0	-102
1700013H16Rik	Q9DAC5	MCG8351	4	1	24.1	5	0	483410	92280	-111	737110	482630	-61
Imp4	Q8VHZ7	U3 small nucleolar ribonucleoprotein protein IMP4	2	1	14.8	3	0	74458	10008	-128	150050	85548	-92
Nol7	Q9D7Z3	Nucleolar protein 7	2	1	13	3	2	205490	32719	-174	154990	82882	-100
Add3	Q9QYB5	Gamma-adducin	2	1	3.6	2	0	27581	2785.2	-80	131680	54220	-110
Rexo4	Q6PAQ4	RNA exonuclease 4	2	1	8.5	3	0	40735	3371.1	-116	113060	37152	-114
Mark2	Q05512	Serine/threonine-protein kinase MARK2	2	1	23.6	4	2	98091	16708	-127	174940	87852	-104
Eri1	Q7TMF2	3'-5' exoribonuclease 1	3	1	14.8	3	0	66853	5575.5	-167	130990	50860	-115
Ppan	Q91YU8	Suppressor of SWI4 1 homolog	4	1	17.7	4	0	70811	8482.1	-141	202160	104420	-103
Noc2l	Q9WV70	Nucleolar complex protein 2 homolog	2	1	4	3	2	28639	2494.5	-89	144790	57354	-114
Ccdc86	Q9JJ89	Coiled-coil domain-containing protein 86	2	1	5.6	2	0	81001	11078	-136	147070	59282	-115
Utp3	Q9JI13	Something about silencing protein 10	2	1	8.7	3	0	129090	13368	-194	288950	138650	-114
Ercc2	O08811	TFIIH basal transcription factor complex helicase XPD subunit	4	1	9.3	7	1	74771	13658	-105	517700	236840	-109
Rrp1b	Q91YK2	Ribosomal RNA processing protein 1 homolog B	4	1	9.9	5	0	47874	8987.7	-79	339170	173770	-113
Gnai2;Gnai3;Gnao1;Gnai1	P08752	Guanine nucleotide-binding protein G(i) subunit alpha-2	3	1	9.9	4	0	75523	6005.7	-183	184480	63353	-140
Herc2	Q4U2R1	E3 ubiquitin-protein ligase HERC2	4	1	1	5	0	1402.1	167.9	7	279300	107480	-131
Kif2a	P28740	Kinesin-like protein KIF2A	6	1	10.2	5	1	76873	8878.4	-147	398850	169410	-128
Hspg2	E9PZ16	Basement membrane-specific heparan sulfate proteoglycan core protein	2	1	0.7	2	0	991.44	102.56	8	164530	47247	-150
Dlat	Q8BMF4	Dihydrolipoyllysine-residue acetyltransferase component of pyruvate dehydrogenase complex, mitochondrial	4	1	10.1	5	0	42730	3868.4	-119	223800	70259	-155
Gar1	Q9CY66	H/ACA ribonucleoprotein complex subunit 1	2	1	15.7	2	1	374040	59607	-143	249370	77427	-160
Mki67ip	Q91VE6	MKI67 FHA domain-interacting nucleolar phosphoprotein	6	1	30.9	11	0	393910	42178	-198	830210	266950	-151
Brix1	Q9DCA5	Ribosome biogenesis protein BRX1 homolog	4	1	15.9	5	0	88778	8015	-178	273980	74993	-170
Gtf2h2	Q9JIB4	General transcription factor IIH subunit 2	5	1	16.4	4	0	84204	6298.1	-191	293740	77110	-176
Cenpe	E9QKK1	Kinesin-like protein	5	1	3.2	6	0	2969	222.46	-1	407940	88330	-192
No66	Q9JJF3	Bifunctional lysine-specific demethylase and histidyl-hydroxylase NO66	6	1	18.4	10	0	105180	8879.1	-193	492030	81145	-219
Cdc42bpb	Q7TT50	Serine/threonine-protein kinase MRCK beta	5	1	3.2	6	1	10965	762.4	-37	303590	40872	-225
Smc6	Q924W5	Structural maintenance of chromosomes protein 6	6	1	9.1	7	1	49988	3069.9	-154	919760	131080	-242
Flii	Q9JJ28	Protein flightless-1 homolog	6	1	7.5	7	0	41239	2906.3	-126	842740	115000	-244
Utp14a	Q640M1	U3 small nucleolar RNA-associated protein 14 homolog A	6	1	11.6	7	0	65637	2702.7	-193	455090	43335	-256
Gkap1	Q9JMB0	G kinase-anchoring protein 1	6	1	26	9	0	114840	4573.8	-254	383730	29857	-259
Wdr74	Q8VCG3	WD repeat-containing protein 74	7	1	26	15	0	195120	12731	-250	684610	87263	-256
Men1	O88559	Menin	5	1	12.3	6	0	76084	3241	-205	443790	30677	-267
Stau1	A2A5S3	Double-stranded RNA-binding protein Staufen homolog 1	4	1	12.2	6	0	72677	0	-230	344930	0	-270
Uaca	Q8CGB3	Uveal autoantigen with coiled-coil domains and ankyrin repeats	7	1	6.5	9	0	24161	1077.8	-83	637100	55029	-278
Safb;Safb2	D3YXK2	Scaffold attachment factor B1	1	1	4.3	2	2	36114	8211.2	-57	428530	0	-285
Rpn1	Q91YQ5	Dolichyl-diphosphooligosaccharide--protein glycosyltransferase subunit 1	8	1	16.8	10	0	89961	2933.1	-234	556120	35422	-290
Dcaf13	Q6PAC3	DDB1- and CUL4-associated factor 13	7	1	24.5	12	1	160550	6285.1	-293	643750	49233	-292
Parn	Q8VDG3	Poly(A)-specific ribonuclease PARN	5	1	9.5	6	0	96667	3051.8	-242	563860	34692	-293
Myo5a	Q99104	Unconventional myosin-Va	12	1	8.9	12	0	49062	1386.4	-164	1672700	125870	-299
Kiaa0020	Q8BKS9	Pumilio domain-containing protein KIAA0020	10	1	23.2	16	1	255390	7393.1	-332	1582300	99323	-315
Specc1l	Q2KN98	Cytospin-A	19	1	23.6	25	0	228570	4382	-343	3990200	170230	-328
Myo5b	P21271	Unconventional myosin-Vb	21	1	18	25	0	106620	2379.1	-273	3392400	151300	-333
Myo1d	Q5SYD0	Unconventional myosin-Id	12	1	16	15	0	122670	2134.4	-294	2424900	94558	-354
Rbm28	Q8CGC6	RNA-binding protein 28	9	1	14.4	9	0	140950	0	-331	963890	0	-376

## Sheet: Mouse testis rep2
Gene names	Uniprot ID	Description	Peptides mock-1	Peptides mock-2	Peptides PRDM9-1	Peptides PRDM9-2	Sequence coverage [%]	MS/MS Count mock-1	MS/MS Count mock-2	MS/MS Count PRDM9-1	MS/MS Count PRDM9-2	iBAQ mock-1	iBAQ mock-2	iBAQ PRDM9-1	iBAQ PRDM9-2	iBAQ-1 Rank difference	iBAQ-2 Rank difference	LFQ intensity mock-1	LFQ intensity mock-2	LFQ intensity PRDM9-1	LFQ intensity PRDM9-2	LFQ-1 Rank difference	LFQ-2 Rank difference
Myh9	Q8VDD5	Myosin-9	84	76	64	60	45.6	228	165	143	133	7830900	1090300	1131400	1338700	-8	-5	700220000	566230000	308520000	342440000	-3	-1
Myh11	E9QPE7	Myosin-11	86	73	57	62	45.3	221	139	93	111	5509400	948690	865600	1172200	-4	-9	461610000	450990000	245380000	281720000	0	-2
Myh11	O08638	Myosin-11	82	71	56	61	42.4	3	1	2	1	39750	7711.2	15214	15435	49	-107	3936300	4194100	4391900	3941300	9	-67
Dock7	Q8R1A4	Dedicator of cytokinesis protein 7	29	21	54	56	32.5	17	12	199	192	70223	14577	2947300	3175000	475	367	10682000	14453000	835180000	811320000	143	72
Numa1	E9Q7G0	Protein Numa1	52	44	48	49	36.1	75	52	81	83	642380	116540	381110	459270	73	41	62559000	68983000	123580000	131770000	11	10
Myh10	Q61879	Myosin-10	69	55	43	49	40.5	92	63	37	48	1232900	173860	162200	185370	-39	-84	99239000	85526000	61437000	54598000	-10	-17
Prpf8	Q99PV0	Pre-mRNA-processing-splicing factor 8	43	38	28	29	25.4	57	30	28	33	39896000	30288000	34660000	19788000	1	1	19289000	32101000	25733000	29702000	13	-14
Rpgrip1l	Q8CG73	Protein fantom	0	1	26	29	30.9	0	0	54	58	202870	52151	57805	84928	14	-75	0	422480	90095000	107050000	887	607
Dhx9	A0A087WPL5	ATP-dependent RNA helicase A	36	31	26	29	35.2	126	51	53	51	12166000	7484000	5486700	3779700	5	-6	233080000	150330000	111760000	106120000	-6	-8
Snrnp200	Q6P4T2	U5 small nuclear ribonucleoprotein 200 kDa helicase	43	37	26	31	25.8	58	37	29	35	0	1067.4	525520	727760	818	614	39360000	48502000	30195000	32202000	-16	-22
Dhx9	E9QNN1	ATP-dependent RNA helicase A	36	31	26	29	35.3	8	4	3	2	4778500	447260	577960	669510	-20	-16	16834000	12619000	13420000	12156000	-19	-34
Gemin5	Q8BX17	Gem-associated protein 5	7	9	25	27	22.4	0	1	38	52	368010	78053	80686	105620	-25	-90	982900	3581600	100120000	75665000	517	227
Vim	P20152	Vimentin	26	24	24	24	62	119	51	82	76	275000	36267	73427	72702	10	-45	385930000	185020000	212860000	144600000	-1	-5
Dctn1	E9Q586	Dynactin subunit 1	0	0	22	22	27.3	0	0	29	34	0	504.72	12507	10685	304	56	0	0	30149000	31107000	851	652
Hnrnpm	Q9D0E1	Heterogeneous nuclear ribonucleoprotein M	24	24	22	22	45.5	107	56	82	87	9025.5	6167.9	400960	457870	703	398	237950000	180510000	189450000	145660000	1	-3
Ddx21	Q9JIK5	Nucleolar RNA helicase 2	32	22	22	23	48.8	81	29	34	35	36333000	25063000	24372000	16289000	1	1	88622000	61201000	79181000	57111000	-3	-4
Ddx17	Q501J6	Probable ATP-dependent RNA helicase DDX17	23	21	22	21	39.2	83	31	52	70	11928000	1501400	3042900	1505000	3	-9	136500000	107110000	117220000	88531000	0	-9
Parp1	Q921K2	Poly (ADP-ribose) polymerase family, member 1	36	28	21	24	42.4	90	26	24	39	0	0	180860	193680	745	536	125210000	80023000	69436000	85054000	-8	-2
Qser1	A2BIE1	Protein Qser1	0	0	20	21	19.5	0	0	26	25	33556000	29586000	26192000	17231000	3	1	0	0	31345000	28260000	855	646
Trim28	Q62318	Transcription intermediary factor 1-beta	11	11	20	20	34.8	9	6	63	71	6830200	1415700	1995900	1393800	11	-8	7035700	14245000	163970000	154590000	181	64
Sf3b1	Q99NB9	Splicing factor 3B subunit 1	33	25	20	20	36.1	46	22	22	19	2614100	217540	485270	423190	-6	-19	29193000	32624000	29422000	28965000	0	-19
Numa1	F6ZQA3	Protein Numa1 (Fragment)	21	20	20	21	40.1	1	1	2	2	5483500	1018800	1672300	1121300	14	-13	754090	882970	735300	645000	-37	-188
Myo7a	P97479	Unconventional myosin-VIIa	34	26	19	23	22.5	48	18	10	16	3017900	256910	466910	778440	-19	19	23336000	19307000	16125000	15092000	-20	-48
Ilf3	Q9Z1X4	Interleukin enhancer-binding factor 3	21	19	18	17	37.5	49	23	27	25	0	0	167340	173300	732	523	29514000	30517000	36071000	32678000	10	-6
Eftud2	O08810	116 kDa U5 small nuclear ribonucleoprotein component	25	21	18	16	35.2	42	19	21	20	158350	50917	1992000	2266300	320	211	29131000	28511000	24700000	28251000	-8	-15
Fxr1	Q61584	Fragile X mental retardation syndrome-related protein 1	23	15	18	18	43.9	54	21	11	22	616710	101590	140140	159730	-15	-60	39393000	22519000	28366000	24111000	-25	-21
Eml3	Q8VC03	Echinoderm microtubule-associated protein-like 3	1	2	17	17	25.4	0	2	70	82	21009	4646.4	5728	7390.9	-71	-177	97047	169650	119320000	133840000	886	685
Ddx5	Q61656	Probable ATP-dependent RNA helicase DDX5	19	18	17	17	40.2	56	22	29	37	2290100	1899900	2490000	1357000	62	-15	60536000	35842000	41360000	53222000	-19	2
Lrch1	P62046	Leucine-rich repeat and calponin homology domain-containing protein 1	0	0	16	14	35	0	0	30	34	255960	31516	37604	48315	-103	-93	0	0	48608000	41450000	868	663
Dhx15	O35286	Pre-mRNA-splicing factor ATP-dependent RNA helicase DHX15	21	17	16	14	32.5	38	15	16	21	1191600	132350	301390	333840	28	-6	15350000	10693000	12653000	13039000	-11	-9
Sf3b3	Q921M3	Splicing factor 3B subunit 3	23	15	16	17	27.9	38	24	16	19	677680	104860	170040	194630	-1	-32	28966000	32877000	28973000	26942000	1	-26
Cttnbp2nl	Q99LJ0	CTTNBP2 N-terminal-like protein	0	0	15	14	33.5	0	0	20	26	1946700	258680	253880	234430	-17	-83	0	0	27246000	25870000	842	640
Trip12	G5E870	E3 ubiquitin-protein ligase TRIP12	28	7	15	18	20.6	36	4	7	12	2952.8	1257.3	1154600	1114800	829	625	13327000	3361800	6785700	6969600	-75	57
Nop56	Q9D6Z1	Nucleolar protein 56	21	9	15	15	48.1	60	8	22	31	2285800	429700	661500	435740	27	-47	61296000	11872000	43515000	31902000	-17	45
Pdcd11	Q6NS46	Protein RRP5 homolog	32	15	15	18	24.3	45	9	15	15	419310	510370	769930	241570	151	-105	26083000	8263600	14021000	13191000	-37	11
Safb2	Q80YR5	Scaffold attachment factor B2	17	10	15	14	21.3	21	6	18	15	0	0	638900	450320	833	615	19415000	13563000	21006000	18516000	4	-3
Hspa8	P63017	Heat shock cognate 71 kDa protein	16	16	15	15	33.3	32	24	46	52	588280	114450	129690	106960	-22	-119	26204000	43456000	60453000	41693000	36	-11
Mprip	P97434	Myosin phosphatase Rho-interacting protein	27	17	15	17	38.5	35	14	12	16	628510	115190	188310	210810	21	-34	14771000	11056000	10338000	11055000	-33	-31
Prdm9	Q96EQ9	Histone-lysine N-methyltransferase PRDM9	1	0	14	15	26.3	0	0	39	64	0	0	338640	225340	798	551	109970	0	69536000	101340000	870	688
Trps1	V9GX74	Zinc finger transcription factor Trps1	0	0	14	15	21.2	0	0	22	24	168940	5021.1	20221	23692	-145	22	0	0	14226000	12162000	807	580
Las1l	A2BE28	Ribosomal biogenesis protein LAS1L	13	2	14	14	30.9	16	3	37	42	2707900	92439	554100	306750	0	23	6667800	2031000	55874000	50392000	165	321
Pelp1	Q9DBD5	Proline-, glutamic acid- and leucine-rich protein 1	9	5	14	15	25	7	0	41	42	354560	14364	38543	42879	-141	-8	8150600	4669700	109470000	121090000	158	186
Ncl	P09405	Nucleolin	17	16	14	12	26.4	69	32	39	41	670140	56931	170800	173940	2	18	245240000	66342000	50598000	70786000	-28	-2
Myh14	Q6URW6	Myosin-14	27	16	14	18	18	23	5	3	8	1006100	432570	775120	513820	83	-32	36794000	32134000	23905000	19977000	-27	-37
Nphp4	P59240	Nephrocystin-4	0	0	13	15	14.5	0	0	16	21	2058700	1669600	2317600	1397300	68	-12	0	0	14678000	14152000	812	594
Spata5	Q3UMC0	Spermatogenesis-associated protein 5	17	6	13	13	31.9	21	2	21	14	315450	32543	53463	61611	-59	-58	4880400	2795400	4256400	5112300	-28	48
Safb	D3YXK2	Scaffold attachment factor B1	13	9	13	13	19.7	13	4	10	8	18449	41634	46200	17479	354	-301	10934000	5502000	11423000	9551400	14	18
Scml2	B1AVB1	Protein Scml2	16	12	13	13	39.5	47	17	24	25	2259.6	0	881050	1113500	832	670	65736000	28890000	49915000	59512000	-16	17
Rbm14	Q8C2Q3	RNA-binding protein 14	17	15	13	12	39.5	39	14	22	26	0	0	76238	77405	636	407	58957000	41551000	69198000	51080000	3	-3
Top2a	Q01320	DNA topoisomerase 2-alpha	20	16	13	17	19.3	26	16	9	20	195570	5729.4	549350	453150	247	406	12321000	14007000	9555500	17635000	-23	-18
Tex10	Q3URQ0	Testis-expressed sequence 10 protein	10	0	12	10	18.8	10	0	22	15	215770	9755.2	1701400	1054800	272	390	3518300	0	21251000	24758000	210	638
Lrch2	Q3UMG5	Leucine-rich repeat and calponin homology domain-containing protein 2	0	0	12	12	27.7	0	0	44	50	6927500	633660	788000	704700	-16	-22	0	0	27565000	24497000	843	636
Scml2	B1AVB2	Protein Scml2	15	12	12	12	39.1	1	0	2	1	406020	69765	78547	94956	-41	-101	594450	272580	667380	847500	1	47
Eif4a3;Gm8994	Q91VC3	Eukaryotic initiation factor 4A-III	15	9	12	13	40.6	32	11	14	23	523660	566470	537010	189250	107	-136	12043000	12653000	13259000	24340000	13	20
Tubb4b;Tubb4a	P68372	Tubulin beta-4B chain	14	10	12	11	47.4	4	2	11	20	15199	0	0	0	-246	-233	7447500	7205200	13905000	12470000	76	16
Fxr2	Q6P5B5	Fragile X mental retardation syndrome-related protein 2	18	13	12	13	37.7	29	8	7	15	0	0	257580	297150	781	579	17738000	9378300	12160000	13145000	-34	3
Gnb2l1	P68040	Guanine nucleotide-binding protein subunit beta-2-like 1	18	16	12	15	77.6	62	22	30	26	0	0	76194	90124	635	428	108980000	70845000	54820000	73272000	-16	-3
Hnrnph1	O35737	Heterogeneous nuclear ribonucleoprotein H	15	13	12	13	48.1	48	19	41	59	138850	8095.8	40546	38293	-1	47	61741000	54409000	48629000	41059000	-14	-18
Lrch3	B2RXP1	Leucine-rich repeat and calponin homology domain-containing protein 3	6	1	11	12	26.1	3	0	19	25	360380	21720	115510	105100	21	65	564210	118400	30447000	30641000	613	648
Ddx20	Q9JJY4	Probable ATP-dependent RNA helicase DDX20	1	1	11	11	21.5	0	0	26	26	1980600	153070	459850	649780	11	38	78697	95141	29965000	21323000	845	629
Dctn2	Q99KJ8	Dynactin subunit 2	0	0	11	11	36.6	0	0	17	30	3620200	680390	1218300	750210	20	-21	0	0	17197000	17887000	819	617
Actg1	P63260	Actin, cytoplasmic 2	17	16	11	13	68	3	1	4	3	183080	31455	38093	88322	-48	-7	4569500	867310	4416000	4930200	-5	258
Nat10	Q8K224	N-acetyltransferase 10	26	8	11	11	31.8	39	6	6	11	13246	20595	22122	12903	285	-276	20698000	6368600	12074000	10535000	-44	9
Actb	P60710	Actin, cytoplasmic 1	17	16	11	13	68	182	81	131	102	66306	0	284970	186630	401	532	694910000	409440000	590230000	811000000	0	4
	A0A075B5P3	Protein Ighg2b (Fragment)	11	10	11	11	50	61	59	59	91	0	0	297180	261700	791	565	290630000	1179300000	396450000	477590000	4	-3
Top2b	Q64511	DNA topoisomerase 2-beta	20	14	11	17	18.8	16	0	4	11	14861	1255.4	5718.8	8114	-10	-28	4160200	2968500	2452100	3784200	-112	-14
Thoc1	Q8R3N6	THO complex subunit 1	16	15	11	12	37.3	21	11	10	13	696720	127070	176100	337890	-1	1	11516000	10222000	10935000	10621000	2	-25
Puf60	Q3UEB3	Poly(U)-binding-splicing factor PUF60	15	14	11	12	41.5	29	31	41	40	329270	78489	301800	270180	143	28	51326000	90904000	51922000	42371000	-4	-27
Ssrp1	Q08943	FACT complex subunit SSRP1	12	9	11	12	23.3	24	2	14	9	771090	115290	102740	110110	-71	-118	12760000	7071100	8460300	8113400	-43	-31
Sf3b2	Q3UJB0	Protein Sf3b2	17	15	11	11	30.3	34	18	21	17	8683700	648520	543230	1309800	-45	5	19569000	19788000	19034000	18075000	-2	-31
Myo1c	Q9WTI7	Unconventional myosin-Ic	16	10	11	10	21	34	5	7	11	3413200	742380	1008500	1004900	18	-17	12742000	8737200	9095400	7437300	-32	-64
Krt14	Q61781	Keratin, type I cytoskeletal 14	10	11	11	10	27.5	3	3	6	4	37621	1565.9	369940	294660	503	517	542410	1292400	2253500	1415400	286	-65
Gigyf2	Q6Y7W8	PERQ amino acid-rich with GYF domain-containing protein 2	18	12	11	14	23.1	27	11	11	15	2812.2	583.68	258470	204810	757	531	11678000	10237000	9094600	7841100	-25	-68
Cdc5l	Q6A068	Cell division cycle 5-like protein	16	10	11	10	37	31	8	16	14	0	0	288850	377960	788	600	11882000	13448000	8693800	9349900	-32	-76
Urb1	Q571H0	Nucleolar pre-ribosomal-associated protein 1	22	13	11	11	13.3	23	4	2	7	214990	10290	65172	90488	26	144	7512700	6306600	6257900	4500000	-24	-118
Pabpc1;Pabpc6	P29341	Polyadenylate-binding protein 1	13	9	11	5	20.8	11	6	6	4	505980	16174	64982	71660	-95	48	4798200	4391500	3870800	3135000	-41	-123
Thbs1	P35441	Thrombospondin-1	0	0	10	10	10.5	0	0	3	3	38720000	6696300	7694000	13796000	-2	2	0	0	3384500	3527700	608	393
Scml2	B1AVB5	Protein Scml2	13	11	10	10	40.1	3	2	2	3	20581000	32113000	12448000	13517000	2	-4	2977000	1199700	3161500	2936200	4	106
C3	P01027	Complement C3	4	6	10	10	5.2	5	9	10	12	51657	5892.3	6523.5	19511	-176	-35	2242000	7787300	65990000	57567000	368	104
Znf638;Zfml	Q61464	Zinc finger protein 638	15	7	10	17	16.2	14	4	6	25	406520	128690	121440	93860	9	-159	3902700	4934400	5332700	13970000	48	73
Taf6	Q62311	Transcription initiation factor TFIID subunit 6	8	10	10	9	19.8	3	6	13	10	2504200	1149000	711030	568100	20	-53	1184600	3892400	5886300	6470200	289	23
Rpsa	P14206	40S ribosomal protein SA	15	14	10	12	62.7	71	38	41	32	566160	84947	144990	135580	-6	-60	183700000	83670000	131850000	177400000	1	11
Tubb5	P99024	Tubulin beta-5 chain	15	10	10	10	49.8	36	13	40	59	599970	63096	110990	138850	-42	-27	40571000	32409000	65182000	54026000	9	8
Actc1;Acta1	P68033	Actin, alpha cardiac muscle 1	15	13	10	11	57	71	25	46	43	15024	13985	25340	20265	301	-140	227740000	155950000	97610000	306700000	-9	5
Rps3	P62908	40S ribosomal protein S3	12	11	10	11	57.6	68	25	31	33	357320	22179	45400	39021	-115	-84	173730000	101010000	83772000	132050000	-8	0
Tuba1b;Tuba1c;Tuba4a;Tuba8	P05213	Tubulin alpha-1B chain	12	9	10	10	42.1	35	18	31	36	287670	34035	47415	62078	-73	-58	59651000	40611000	45323000	42740000	-13	-3
Thoc5	Q8BKT7	THO complex subunit 5 homolog	12	9	10	10	24.5	17	5	14	9	407720	48281	106960	96626	-5	-47	7329500	5397800	8163400	7404500	19	-14
Mki67	E9PVX6	Protein Mki67	19	10	10	16	11.9	23	9	11	17	87151	9427	11546	11277	-149	-194	9763600	10436000	9101800	12130000	5	-15
Acin1	Q9JIX8	Apoptotic chromatin condensation inducer in the nucleus	13	7	10	9	12.7	28	4	17	15	200840	49115	46043	17447	-28	-325	6318900	6394600	9233600	8705400	55	-16
Sfpq	Q8VIJ6	Splicing factor, proline- and glutamine-rich	14	13	10	10	27.2	50	34	20	27	0	0	18392	21072	397	193	64854000	44127000	21759000	28161000	-51	-33
Eif3a	P23116	Eukaryotic translation initiation factor 3 subunit A	20	10	10	12	17.7	26	3	5	6	80676	6047.5	30077	35775	58	78	14818000	5453700	6106000	6601900	-100	-35
Supt16h;Supt16	Q920B9	FACT complex subunit SPT16	18	12	10	11	21.6	23	9	10	10	33592	31715	165730	240860	451	127	14173000	11300000	10690000	9969700	-26	-47
Crnkl1	P63154	Crooked neck-like protein 1	11	10	10	9	18.4	6	6	10	7	54486	6193.7	17805	69742	33	171	2813900	3153500	3823100	3298700	56	-53
Rai14	Q9EP71	Ankycorbin	18	13	10	9	26.8	22	8	8	7	31830	39325	68123	50512	353	-110	10128000	7559300	6862900	6146200	-40	-82
Spats2	Q8K1N4	Spermatogenesis-associated serine-rich protein 2	11	5	10	8	27.7	13	3	12	5	14396000	2217500	2789800	4492100	-4	5	2940600	2884700	3336200	2350400	20	-103
Acta2;Actg2	P62737	Actin, aortic smooth muscle	15	13	10	11	57	3	2	0	0	13431000	2661100	1066200	3982000	-21	2	5994300	11725000	0	0	-662	-832
Senp3	Q9EP97	Sentrin-specific protease 3	6	1	9	8	22.4	7	1	36	26	2296200	364740	1249500	1252500	49	23	2020200	502790	56645000	53342000	387	559
Nphp1	Q3TWM5	Nephrocystin-1	0	0	9	10	19.1	0	0	10	15	12997000	1122000	1380100	2470600	-12	13	0	0	7481000	9382100	734	550
Kdm2a	P59997	Lysine-specific demethylase 2A	0	0	9	9	10.2	0	0	10	17	2150200	389970	1051200	905420	47	7	0	0	9707600	8604400	763	535
Mybbp1a	Q7TPV4	Myb-binding protein 1A	15	1	9	6	16.1	21	0	14	11	357170	49578	105500	54494	13	-126	6991600	168460	7301600	5865000	14	471
Wdr18	Q4VBE8	WD repeat-containing protein 18	6	2	9	11	32.5	5	0	27	27	67671	10986	18172	42470	2	26	2321100	1682800	33707000	83987000	331	373
Nop58	Q6DFW4	Nucleolar protein 58	15	2	9	9	38.1	50	1	15	19	151580	14882	45127	51110	9	13	37126000	1521100	12320000	16962000	-75	318
Myef2	Q8C854	Myelin expression factor 2	12	7	9	7	37.6	21	3	15	11	314210	13760	30843	38447	-156	-24	7277700	5958600	11520000	14385000	60	52
Top1	Q04750	DNA topoisomerase 1	13	10	9	9	23.1	21	8	8	15	2942200	351030	221900	330860	-60	-67	25546000	7095600	9289900	13096000	-79	24
Eif3e	P60229	Eukaryotic translation initiation factor 3 subunit E	14	8	9	12	38.2	27	3	7	12	354670	38089	59577	65646	-62	-70	9189400	4593100	7777900	7770300	-6	18
Tuba3a	P05214	Tubulin alpha-3 chain	11	7	9	9	37.6	2	0	2	3	80779	29321	37975	30962	95	-165	2511500	1612900	1910100	2240700	-53	4
Hnrnpu	Q8VEK3	Heterogeneous nuclear ribonucleoprotein U	13	11	9	11	23.6	20	21	16	26	199070	26858	29787	30579	-103	-154	13787000	42219000	23301000	41305000	43	-12
Nol6	Q8R5K4	Nucleolar protein 6	13	8	9	9	13.5	20	5	10	12	178920	26731	42707	32155	-29	-141	8207700	3892900	5496200	5134800	-42	-14
Sf3a1	Q8K4Z5	Splicing factor 3A subunit 1	14	13	9	11	25.3	21	6	6	11	31644	0	0	4723.9	-352	-73	11562000	11590000	12303000	11300000	12	-33
Ylpm1	D3YWX2	YLP motif-containing protein 1	14	15	9	17	13.5	16	14	1	19	18119	69234	19899	21100	215	-339	6631600	19487000	5412800	17359000	-21	-36
Rbm25	B2RY56	RNA-binding protein 25	11	8	9	9	18	19	7	10	14	282840	118920	0	0	-716	-816	9320600	11548000	15592000	11051000	68	-37
Prrc2a	Q7TSC1	Protein PRRC2A	19	15	9	15	15.8	27	7	7	13	86329	8820.4	1323600	732930	426	387	7986300	9499200	7053200	8849300	-8	-43
Abcf2	Q99LE6	ATP-binding cassette sub-family F member 2	10	9	9	9	20.4	13	5	8	8	0	0	90059	79446	658	410	10790000	6260300	7420800	6981300	-34	-47
Eif3b	Q8JZQ9	Eukaryotic translation initiation factor 3 subunit B	16	9	9	9	32	21	10	9	9	0	0	48643	61595	564	379	13482000	12012000	11930000	10606000	-5	-47
Gm14569	E9Q0C6	Protein Gm14569	15	8	9	11	18.3	29	6	9	16	108100	358.39	37761	28097	29	239	9262300	7919200	8613400	7813700	3	-52
Hsp90ab1	P11499	Heat shock protein HSP 90-beta	11	7	9	8	19.1	12	6	12	6	140470	14314	679190	1693500	303	361	5410600	4884300	7320600	4978200	46	-64
Ubtf	P25976	Nucleolar transcription factor 1	15	14	9	11	23.9	30	12	11	4	2268400	16452	182030	169870	-60	164	15778000	9255000	10517000	7011300	-40	-79
Lig3	Q3UC82	DNA ligase	12	9	9	9	16.1	18	5	10	11	443760	61218	244740	119810	76	-45	7262900	5926900	4785300	5136800	-52	-81
Lrch2	F7AAC3	Leucine-rich repeat and calponin homology domain-containing protein 2 (Fragment)	0	0	9	9	36.6	0	0	2	2	88634	75073	323940	567650	357	95	0	0	188820	450390	45	-82
Ddx3x;D1Pas1	Q62167	ATP-dependent RNA helicase DDX3X	11	8	9	10	27.8	17	6	10	13	815070	60649	90755	112920	-89	-52	10147000	7274200	5281700	5828700	-75	-87
Svil	Q8K4L3	Supervillin	18	11	9	11	15.7	17	6	5	7	453590	30198	72018	85384	-68	-6	5045600	5125200	4029100	4347200	-40	-95
Igh-3	P01867	Ig gamma-2B chain C region	9	8	9	9	32.9	10	4	6	9	12950000	107150	88537	214240	-217	-26	29712000	125910000	18398000	12707000	-29	-113
Trim21	Q62191	E3 ubiquitin-protein ligase TRIM21	1	2	8	9	24.9	0	0	40	37	101710	14573	35193	48890	28	12	188860	387180	42153000	77160000	820	614
Strn	O55106	Striatin	0	0	8	10	22.8	0	0	14	15	184070	11452	37003	39387	-60	2	0	0	8738200	6101000	752	488
Hp1bp3	Q3TEA8	Heterochromatin protein 1-binding protein 3	8	0	8	5	23.1	14	0	8	4	566040	289790	214170	500890	42	-24	7338400	0	2948000	2538900	-152	330
Scaper	F8VQ70	Protein Scaper	9	2	8	9	11.1	10	2	5	6	314050	58536	86689	99262	14	-71	2873900	1105900	3179800	3750100	14	175
Kiaa1429;1110037F02Rik	A2AIV2	Protein virilizer homolog	11	2	8	5	7.8	10	0	3	6	74134	42455	14833	81991	-57	-52	2726900	553920	2268700	2118900	-38	163
Mdn1	J3QMC5	Protein Mdn1	1	1	8	14	4	0	1	6	14	363520	57276	169340	160940	63	2	1682300	2034400	3898600	6776000	166	149
Larp7	Q05CL8	La-related protein 7	8	5	8	5	15.6	9	1	6	6	106660	15685	15765	33226	-113	-73	4065600	1621000	3649300	3126200	-27	62
Tcof1	O08784	Treacle protein	8	6	8	8	10.5	29	4	13	14	530530	51793	91462	93089	-57	-60	11429000	5111700	12221000	11763000	17	53
Ilf2	Q9CXY6	Interleukin enhancer-binding factor 2	11	9	8	10	45.1	21	10	15	15	371600	78273	96390	79567	-8	-130	31992000	13773000	12649000	42534000	-64	38
Mark2	Q05512	Serine/threonine-protein kinase MARK2	9	6	8	8	19.1	13	1	8	10	137840	16384	33388	39890	-33	-44	2755100	2092600	3873500	3474300	66	31
Nop2	E9QN31	Probable 28S rRNA (cytosine-C(5))-methyltransferase	11	8	8	7	21	20	2	10	8	218280	48568	90715	49726	65	-136	9018100	3715600	7079600	5957000	-21	22
Srbd1	F8WGW3	S1 RNA-binding domain-containing protein 1	17	3	8	9	22.7	17	0	1	4	753850	127720	117490	55078	-51	-225	4313000	2640200	3029300	3693800	-72	5
Rfc2	Q9WUK4	Replication factor C subunit 2	11	8	8	11	46.7	20	9	8	20	161200	15983	30507	42236	-71	-29	10427000	6649200	14089000	9259500	43	-11
Hnrnpl	Q8R081	Heterogeneous nuclear ribonucleoprotein L	8	7	8	5	29.2	20	12	13	9	335270	59299	64059	58803	-42	-142	8747300	6529300	6868700	8887700	-22	-12
Hnrnpc	Q9Z204	Heterogeneous nuclear ribonucleoproteins C1/C2	8	7	8	6	35.8	20	7	19	12	0	0	3806.9	7203.7	60	-1	28138000	24726000	13199000	24663000	-49	-21
Eif3l	Q8QZY1	Eukaryotic translation initiation factor 3 subunit L	15	7	8	8	34.4	22	5	12	9	68399	9689.9	13453	18440	-66	-103	11333000	6795900	7482700	7776800	-35	-38
Myo6	E9Q175	Unconventional myosin-VI	11	6	8	9	12.1	13	2	6	7	2424100	2700400	627900	372830	16	-103	5428000	2721200	3090000	2988400	-102	-46
Rfc1	P35601	Replication factor C subunit 1	20	10	8	9	24.3	33	7	6	9	0	0	0	4205.7	-86	-89	9969700	5406200	8506000	5980000	-6	-47
Mb21d2	D3Z742	MCG125361, isoform CRA_a	8	9	8	9	24	10	7	7	18	15334	8846.2	985340	1509700	687	420	6221800	14854000	11810000	11146000	83	-69
Znf326;Zfp326	O88291	DBIRD complex subunit ZNF326	7	5	8	7	24	11	5	13	8	0	0	67951	76302	621	403	4012000	3253200	6049100	2957800	54	-81
Smu1	Q3UKJ7	WD40 repeat-containing protein SMU1	9	6	8	8	27.1	8	4	9	13	360470	0	50679	25551	-98	221	5523800	6429600	6441400	5426000	17	-86
Ddx1	Q91VR5	ATP-dependent RNA helicase DDX1	10	9	8	8	23.2	12	8	8	4	44685	1615.6	18353	26411	71	162	4622900	5323300	5240500	4487200	19	-93
Ik	Q9Z1M8	Protein Red	12	8	8	9	31.8	13	4	3	4	31640	596.49	9002.8	6551	-33	-35	2289900	3468200	3332900	2847000	83	-99
Lamc1	F8VQJ3	Laminin subunit gamma-1	10	9	8	6	9.2	9	5	6	8	1080.9	690.56	4470.4	12443	92	75	3074600	3829600	3111500	3027100	-5	-109
Col6a3	E9PWQ3	Protein Col6a3	21	11	8	11	11.1	24	9	6	3	185940	18164	53702	33592	15	-91	5784300	6108700	3114900	4388800	-106	-117
Dhx35	A2ACQ1	Protein Dhx35	9	12	8	10	23	7	10	8	8	267320	8872.5	50890	64454	-49	118	2720300	6611400	5187400	4073200	116	-136
Ddx41	Q91VN6	Probable ATP-dependent RNA helicase DDX41	12	10	8	7	25.6	9	6	10	4	1477000	148370	186470	717710	-31	48	3289600	6068100	6234600	3628500	100	-145
Ddx3y	Q62095	ATP-dependent RNA helicase DDX3Y	9	7	8	8	19.1	2	0	0	0	95224	16719	40418	31614	74	-95	1005000	471550	315230	0	-277	-330
Znf629	Q6A085	Zinc finger protein 629	0	0	7	9	14	0	0	6	11	433730	22733	79645	66506	-51	-2	0	0	3104100	4778100	585	449
Dctn4	Q8CBY8	Dynactin subunit 4	0	0	7	6	19.1	0	0	8	3	112400	5284.2	16881	24099	-113	22	0	0	5186500	4512200	675	435
Vwa5a	Q99KC8	von Willebrand factor A domain-containing protein 5A	0	0	7	8	13.5	0	0	9	10	447440	57422	103150	199030	-23	30	0	0	4109000	4168500	641	424
Ptrf	O54724	Polymerase I and transcript release factor	4	2	7	6	25.5	5	1	15	10	805060	173400	178030	119240	-5	-141	2963200	1636600	10791000	7893900	186	217
Ddx23	D3Z0M9	MCG18410, isoform CRA_a	8	1	7	6	11.7	6	0	5	4	1659400	286730	164030	508710	-56	-21	2468600	259210	1995600	1755400	-42	213
Ncoa5	Q91W39	Nuclear receptor coactivator 5	9	3	7	8	25.2	13	1	13	10	522880	51884	98834	62438	-46	-110	7265100	2538000	7423600	8232900	12	145
Nufip2	Q5F2E7	Nuclear fragile X mental retardation-interacting protein 2	10	4	7	8	23.4	11	3	7	8	95380	6723.8	20304	17622	-42	-70	4420100	2011000	3419700	4046100	-44	76
Smarca5	Q91ZW3	SWI/SNF-related matrix-associated actin-dependent regulator of chromatin subfamily A member 5	14	4	7	10	16.6	16	1	4	3	239370	14886	39760	36842	-84	-43	3450700	1727300	4883600	3461500	48	71
Ddx50	Q99MJ9	ATP-dependent RNA helicase DDX50	15	5	7	9	30	22	0	6	4	270100	133560	161380	137910	103	-97	8996800	2622500	4420700	5244200	-89	67
Paf1	Q8K2T8	RNA polymerase II-associated factor 1 homolog	8	4	7	7	24.9	7	2	8	8	211900	36724	85181	40142	64	-139	3316400	2114100	4242400	3789700	34	47
Fmr1	P35922	Fragile X mental retardation protein 1 homolog	9	6	7	7	23.3	16	2	6	7	233360	47289	99084	83676	62	-61	5679800	3367800	5303800	5805400	-9	32
Prpf3	Q922U1	U4/U6 small nuclear ribonucleoprotein Prp3	9	8	7	8	19.2	12	4	9	8	204150	55744	44854	34215	-37	-222	3351100	3611500	4727900	5924900	50	25
Rps4x	P62702	40S ribosomal protein S4, X isoform	8	7	7	8	34.6	18	8	6	18	221110	53696	56852	43691	-6	-169	33208000	13202000	14191000	25379000	-53	19
Ybx1	P62960	Nuclease-sensitive element-binding protein 1	9	5	7	6	55.9	40	9	22	25	49783	9474	13014	11570	-24	-186	44676000	13589000	30196000	28172000	-20	18
Poldip3	Q3UDD3	Polymerase delta-interacting protein 3	9	7	7	9	32.2	24	11	18	17	47662	6181.9	4861.2	10590	-219	-162	9036300	9426000	10956000	15298000	33	16
Hnrnpk;Gm7964	P61979	Heterogeneous nuclear ribonucleoprotein K	8	7	7	6	25.2	15	10	13	8	83493	87370	50353	48535	140	-214	10015000	8327400	9327000	13992000	7	14
Hnrnpf	Q9Z2X1	Heterogeneous nuclear ribonucleoprotein F	8	7	7	8	29.2	14	5	12	18	117810	61998	53627	25697	82	-299	11857000	11470000	14097000	16864000	24	10
D10Wsu52e	Q99LF4	tRNA-splicing ligase RtcB homolog	9	6	7	7	25.7	9	3	7	7	0	2654	6394.1	0	165	-341	5121600	4090600	4775000	5657600	-10	-10
Clasp2	Q8BRT1	CLIP-associating protein 2	10	3	7	9	10.9	8	1	4	5	32420	4082.3	2080.5	0	-309	-397	3867300	1789800	2646800	2311300	-83	-11
Capza2	P47754	F-actin-capping protein subunit alpha-2	10	5	7	10	53.5	14	4	8	14	0	0	23464	47598	449	339	11095000	9865400	11011000	11950000	10	-12
Serbp1	Q9CY58	Plasminogen activator inhibitor 1 RNA-binding protein	12	10	7	5	37.6	19	8	2	3	0	0	102510	49161	672	346	31632000	11085000	14272000	12482000	-46	-18
Des	P31001	Desmin	10	7	7	5	23	7	1	3	1	0	0	41187	38824	532	304	2341900	1419200	2128200	1825700	-19	-25
Eif3c	Q8R1B4	Eukaryotic translation initiation factor 3 subunit C	10	7	7	7	13.8	26	6	8	7	111280	15777	273340	168110	294	169	9623300	4960600	6371900	6348500	-46	-26
Tpm3-rs7	D3Z2H9	Protein Tpm3-rs7	11	8	7	9	31.9	22	10	12	11	77061	1404.3	17616	13422	-28	59	23062000	14564000	14635000	16170000	-25	-28
Sart1	Q9Z315	U4/U6.U5 tri-snRNP-associated protein 1	8	5	7	7	16.6	16	2	5	6	329810	14398	163890	102470	77	112	2085800	2541500	3558000	2827900	118	-39
Cdc73	Q8JZM7	Parafibromin	8	4	7	8	24.1	8	0	2	3	223310	20885	57624	56875	-7	-12	2859100	2684200	2955000	2766300	0	-59
Myo1b	P46735	Unconventional myosin-Ib	12	9	7	10	13.6	13	5	6	8	92411	3142.1	22993	26549	-7	104	5511500	3250000	3205800	3135100	-91	-65
Rps4y2	Q3V1Z5	40S ribosomal protein S4	8	7	7	8	34.7	8	2	1	5	358510	15694	43174	41521	-130	-30	8244500	4795200	1747200	4760300	-266	-65
Tpm3	E9Q7Q3	Tropomyosin alpha-3 chain	11	7	7	8	34.3	5	2	2	2	144060	19769	66083	52695	84	-18	2103300	4506100	3821900	3877700	126	-85
Hspa5	P20029	78 kDa glucose-regulated protein	7	4	7	7	18	2	1	8	5	318290	34576	56935	66154	-52	-53	1597200	1721500	2347000	1444600	72	-108
Cpsf3	Q9QXK7	Cleavage and polyadenylation specificity factor subunit 3	9	8	7	6	18.6	5	6	3	4	134220	40765	58312	64670	73	-74	2363400	3924700	2600900	2478400	19	-150
Tjp1	P39447	Tight junction protein ZO-1	17	10	7	8	18.4	19	5	4	5	3600500	151440	197590	528390	-81	26	5153400	4829200	3304700	3078000	-79	-152
Hnrnph2	P70333	Heterogeneous nuclear ribonucleoprotein H2	9	7	7	8	27.6	4	1	1	5	3675600	263530	901120	825700	10	15	4583300	3320000	1289000	1933600	-243	-173
Dsp	E9Q557	Desmoplakin	3	5	7	1	3.3	2	5	7	1	469760	96994	175860	233720	34	-8	682210	1984500	3093400	265490	296	-522
Actr1b	Q8R5C5	Beta-centractin	0	0	6	7	29.5	0	0	21	10	464940	83643	181890	146500	44	-46	0	0	11281000	19229000	779	625
Nol9	Q3TZX8	Polynucleotide 5'-hydroxyl-kinase NOL9	5	1	6	7	13.6	6	0	15	16	912340	178230	332250	427020	42	-8	2490600	123220	14323000	11985000	267	572
Hells	Q60848	Lymphocyte-specific helicase	5	1	6	7	11	5	0	10	7	50968	3136.8	12445	14991	-39	5	2462200	152690	4657300	5727700	122	468
Strn4	P58404	Striatin-4	0	0	6	5	16.4	0	0	5	5	283670	41704	71721	63487	0	-79	0	0	4526100	5398100	658	467
Gkap1	Q9JMB0	G kinase-anchoring protein 1	8	1	6	9	35.5	7	1	6	20	740540	118160	195030	391700	13	23	2860800	824800	8117000	9679700	165	368
Ddx18	Q8K363	ATP-dependent RNA helicase DDX18	15	1	6	7	39.7	18	0	5	9	2397000	161060	163910	128730	-85	-121	11523000	229780	1779600	3382300	-300	360
Kif20b	Q80WE4	Kinesin-like protein KIF20B	1	2	6	6	4.6	0	0	6	7	100030	11462	24176	11561	-17	-222	109880	261630	2219800	2974500	503	327
Flii	Q9JJ28	Protein flightless-1 homolog	10	1	6	5	10.2	11	1	3	2	329130	30229	46303	44020	-94	-97	2205600	0	1500100	1477600	-62	212
Taf5	F8VPY2	Transcription initiation factor TFIID subunit 5	3	3	6	7	15.4	0	0	7	7	1890800	143270	183130	367490	-43	-4	313650	259530	2844700	1723000	445	209
Dkc1	Q9ESX5	H/ACA ribonucleoprotein complex subunit 4	12	5	6	5	33.8	33	2	16	14	86472	8345.4	30121	28205	43	-18	33336000	5339400	14919000	17853000	-47	88
Csnk2a1	Q60737	Casein kinase II subunit alpha	5	4	6	7	22.8	4	3	5	8	106930	11180	38396	30029	37	-47	3749400	4518900	4732800	10420000	34	60
Snw1	Q9CSN1	SNW domain-containing protein 1	6	6	6	6	20.1	12	5	10	8	105210	9738.8	13040	19710	-159	-94	4789000	4599500	7097500	9891700	54	50
Tbl3	Q8C4J7	Transducin beta-like protein 3	13	6	6	6	27	21	6	6	8	796500	47005	30532	128190	-263	9	3696600	2613900	3309900	4360700	-27	37
Zfr	O88532	Zinc finger RNA-binding protein	8	6	6	7	13.6	13	2	7	7	282440	47815	40104	94683	-104	-47	2797300	2738100	5212700	4512800	111	30
Sltm	Q8CH25	SAFB-like transcription modulator	9	5	6	8	13.9	12	0	6	8	58222	14582	42130	19005	167	-161	5877800	3011400	5252500	5019800	-15	29
Gtpbp4	Q99ME9	Nucleolar GTP-binding protein 1	13	2	6	4	27.8	22	0	5	4	89959	43257	37465	18602	69	-299	10553000	1544000	3814400	2356300	-139	16
Wdr36	Q3TA68	Protein Wdr36	12	5	6	7	18.6	17	1	6	7	80807	10350	7728	10123	-222	-234	6418500	2604300	2620400	3541200	-158	6
Rps3a	P97351	40S ribosomal protein S3a	9	6	6	7	36.4	20	5	3	6	282160	21830	18144	81460	-236	27	34338000	22431000	20066000	35378000	-33	4
	A0A075B5P4	Ig gamma-1 chain C region secreted form (Fragment)	6	7	6	6	36.7	21	30	41	50	16168	0	0	0	-257	-233	55020000	176340000	178670000	144250000	21	-4
Gapdh;Gm7293	P16858	Glyceraldehyde-3-phosphate dehydrogenase	6	6	6	8	30.3	13	4	16	18	4691.7	4580.3	6265	568.32	111	-410	13704000	35938000	49421000	41096000	78	-9
Srsf1	Q6PDM2	Serine/arginine-rich splicing factor 1	10	8	6	8	37.1	29	4	16	18	0	0	0	3018.8	-86	-150	21378000	17595000	15775000	18269000	-16	-25
Nono	Q99K48	Non-POU domain-containing octamer-binding protein	8	5	6	4	29.6	25	9	12	16	0	0	220740	462010	767	622	29891000	22341000	18503000	18892000	-29	-29
Glyr1	Q922P9	Putative oxidoreductase GLYR1	9	6	6	3	28.4	16	1	6	4	97212	1968.6	288920	220380	327	470	11636000	4276500	5741000	5113800	-83	-30
Capza1	Q5RKN9	Capping protein (Actin filament) muscle Z-line, alpha 1	9	5	6	8	54.5	14	3	6	12	51173	900.74	48167	52174	220	326	5638600	5833200	7035400	7081600	28	-33
Orc1	Q9Z1N2	Origin recognition complex subunit 1	10	2	6	6	16.8	10	1	11	6	0	0	88176	67078	655	392	3394700	1600900	2251700	1854500	-96	-44
Ubap2l	Q80X50	Ubiquitin-associated protein 2-like	9	7	6	7	20.8	12	0	4	6	153550	4829.9	134630	179330	168	342	6659800	4426300	4074800	4566700	-71	-59
Matr3	Q8K310	Matrin-3	10	7	6	8	19.3	28	8	8	9	418420	1606.3	29069	25651	-217	157	14134000	13594000	10323000	10611000	-30	-63
Ascc3	E9PZJ8	Activating signal cointegrator 1 complex subunit 3	11	5	6	5	6.4	12	1	1	3	5604.1	4505.4	94793	71296	606	226	2492900	1993800	2120200	1969900	-36	-69
Prpf19	Q99KP6	Pre-mRNA-processing factor 19	10	5	6	6	29.8	14	4	10	8	1274.5	626	8597.1	10579	216	43	13818000	13894000	11718000	10241000	-12	-72
Specc1l	Q2KN98	Cytospin-A	10	5	6	7	12.4	12	0	2	5	38039	51971	8264.2	8215.7	-87	-474	3276700	2249500	2207500	2140500	-85	-79
Tfip11	Q9ERA6	Tuftelin-interacting protein 11	9	3	6	4	18.3	10	2	5	3	7450.3	5325.2	23254	22040	365	4	2295900	1457300	1211700	1254000	-122	-101
Kif23	E9Q5G3	Kinesin-like protein KIF23	6	5	6	6	10.5	10	2	4	5	1473000	35850	139870	112170	-68	17	2168700	2373500	2193000	1951500	8	-104
Heatr1	G3X9B1	HEAT repeat containing 1	7	5	6	5	5.3	8	2	5	4	136140	43761	50942	237320	46	86	2876700	2288400	1763600	1875900	-107	-111
Supt6h	Q62383	Transcription elongation factor SPT6	13	8	6	5	11.9	20	6	5	5	252900	54324	129880	114770	92	-33	6280600	4624900	3431800	3352300	-92	-123
Xrn2	Q9DBR1	5'-3' exoribonuclease 2	10	7	6	6	14.2	14	1	5	5	95770	65859	228530	264750	312	37	3369100	3399400	3994900	2362200	20	-129
Skiv2l2	Q9CZU3	Superkiller viralicidic activity 2-like 2	9	9	6	6	13.9	12	5	4	2	165550	17824	20841	22332	-138	-163	3241700	3519000	2949600	2346700	-24	-142
Actr1a	P61164	Alpha-centractin	0	0	5	8	29.5	0	0	24	22	83933	10427	34023	35220	68	0	0	0	21078000	39797000	833	659
Dnaja2	Q9QYJ0	DnaJ homolog subfamily A member 2	3	0	5	5	19.9	4	0	8	14	174130	8588.7	35790	54452	-57	97	2201000	0	2593900	9121700	38	546
Dmrt1	Q9QZ59	Doublesex- and mab-3-related transcription factor 1	5	1	5	7	40.6	3	0	14	16	405320	5793.4	46244	23107	-126	-4	943240	330180	7186600	9973300	361	502
Strn3	B2RQS1	Striatin-3	1	0	5	7	14.9	0	0	7	7	214300	15407	19051	22930	-190	-136	247700	0	1662400	5660700	388	472
Strap	Q9Z1Z2	Serine-threonine kinase receptor-associated protein	0	0	5	6	24.9	0	0	7	10	3006900	259780	271200	549380	-45	-9	0	0	6520300	5280500	709	464
Gemin4	Q6P6L6	Gem (Nuclear organelle) associated protein 4	1	1	5	5	6.2	0	1	6	6	3967200	3493200	5366100	4863700	36	1	122740	661500	10276000	8809100	747	382
Tmod3	Q9JHJ0	Tropomodulin-3	10	4	5	10	38.4	17	0	5	8	488210	245810	795090	1081300	136	34	4308300	1470300	4436700	7064200	4	220
Ipo5	Q8BKC5	Importin-5	0	0	5	5	6.7	0	0	3	4	3070800	194580	245340	535080	-56	7	0	0	1986400	1428900	498	200
Hcfc1	Q61191	Host cell factor 1	3	2	5	5	3.9	1	0	3	6	441800	45676	97139	56829	-31	-108	597330	623640	2005400	2528800	248	175
Phf8	Q80TJ7	Histone lysine demethylase PHF8	7	4	5	5	11.2	6	1	6	4	1721400	278270	413120	274560	19	-75	3396000	1515300	4465600	5112800	39	165
Thrap3	Q569Z6	Thyroid hormone receptor-associated protein 3	8	3	5	6	9.7	21	0	6	7	431160	56071	127480	194710	7	34	7094000	2030600	9106200	7332900	40	165
Nfix	P70257	Nuclear factor 1 X-type	4	3	5	5	18.6	4	0	10	10	90297	2440.6	21119	14543	-23	25	2758400	2639300	7207700	7453800	163	121
Rrp1b	Q91YK2	Ribosomal RNA processing protein 1 homolog B	4	0	5	4	11.6	5	0	6	3	281050	29170	53437	66442	-46	-35	975090	0	978530	958930	-23	112
Tdrd3	Q91W18	Tudor domain-containing protein 3	5	1	5	5	9.6	5	1	3	4	496700	48026	99390	106330	-40	-27	1809400	548380	1190100	1466500	-85	83
Cdkn2aip	Q8BI72	CDKN2A-interacting protein	7	2	5	5	21.1	7	0	9	4	27502	2727.2	5156.2	5639.6	-117	-156	1621200	1601000	2598300	3417100	85	82
Rpl4	Q9D8E6	60S ribosomal protein L4	9	3	5	4	26	23	2	7	6	1058400	132600	255770	153380	21	-88	31733000	4394100	9748400	11233000	-91	78
Fbln5	Q9WVH9	Fibulin-5	4	2	5	6	19.4	4	0	3	6	81249	6840.7	12593	10710	-117	-172	2699000	1768400	3320300	3238900	44	58
Xab2	Q9DCD2	Pre-mRNA-splicing factor SYF1	8	2	5	7	17.2	9	2	6	6	58823	6194.2	10585	10389	-107	-169	1916200	1136800	1758400	2160700	-11	55
Ythdc2	B2RR83	Probable ATP-dependent RNA helicase YTHDC2	10	4	5	5	10.5	12	0	0	3	61280	6134.5	14806	14124	-30	-100	1882400	1095800	928620	2034200	-146	53
Wtap	Q9ER69	Pre-mRNA-splicing regulator WTAP	5	3	5	3	20.5	6	2	6	8	27612	3469.1	4990.1	5458.5	-125	-188	2384000	2099400	4157900	3706700	108	44
Rbmxl2	Q9DAE2	Protein Rbmxl2	5	4	5	4	16.6	8	2	6	6	99863	11523	12914	9734.7	-153	-259	8234300	4778100	2824400	10001000	-176	44
Rps18;Gm10260	P62270	40S ribosomal protein S18	5	4	5	5	32.2	6	2	3	6	97050	12200	27340	17845	7	-148	10775000	4111500	11319000	7927500	15	44
Eef1a1	P10126	Elongation factor 1-alpha 1	4	6	5	9	22.5	7	12	9	27	60273	11882	14907	15172	-19	-176	8790100	24388000	41637000	98438000	122	30
Capzb	P47757	F-actin-capping protein subunit beta	6	4	5	7	25.6	12	2	6	7	64225	22523	38502	3165.6	138	-535	2973000	4225400	7528300	7261000	149	23
Fus	P56959	RNA-binding protein FUS	6	4	5	5	18	16	3	5	7	8879.3	1584.8	5092.1	3280.3	24	-202	10028000	5838400	8951000	10130000	-1	18
Dnajc21	E9Q8D0	Protein Dnajc21	6	4	5	4	17.9	6	4	3	4	0	0	375350	638420	802	641	2376200	1425800	1450400	2117300	-91	12
Taf4a	E9QAP7	Protein Taf4a	2	3	5	5	11	1	3	5	3	44630	0	62907	141000	284	499	374610	1019000	1555300	1678600	306	9
Rpl5	P47962	60S ribosomal protein L5	10	6	5	9	33	59	12	17	29	135800	6475.3	254610	323280	254	356	63507000	22780000	54841000	32689000	-10	1
Rbm15	Q0VBL3	Protein Rbm15	7	5	5	5	9.5	13	4	4	7	3581.8	0	61645	54673	570	362	2263200	2835200	4769300	3802100	148	-1
Fip1l1	Q9D824	Pre-mRNA 3'-end-processing factor FIP1	9	5	5	5	26.3	14	6	10	9	0	0	55841	106780	588	455	4690700	3686000	6796200	5012000	53	-6
Papd5	Q68ED3	Non-canonical poly(A) RNA polymerase PAPD5	5	3	5	5	13.6	7	0	5	4	1903.2	1889.7	81121	72356	638	327	1263100	701540	1653200	1144100	41	-9
Rplp0;Gm8730	P14869	60S acidic ribosomal protein P0	9	7	5	7	44.2	50	22	35	28	318200	18159	35767	118320	-140	105	131350000	80025000	101310000	65096000	-2	-9
Fbl	P35550	rRNA 2'-O-methyltransferase fibrillarin	10	8	5	8	43.4	33	6	7	9	0	0	12513	9800.2	305	50	37523000	13940000	16775000	17958000	-49	-13
Raly	Q64012	RNA-binding protein Raly	8	6	5	7	28.5	20	7	12	13	6151.6	1167.2	11567	14070	227	76	26117000	16219000	21859000	19518000	-5	-18
Rps16	P14131	40S ribosomal protein S16	8	5	5	6	47.3	9	2	4	8	94888	5446.9	37047	43634	55	128	8370800	7537000	4401400	8904500	-88	-26
Thoc2	B1AZI6	THO complex subunit 2	11	5	5	5	9.1	13	2	6	5	221590	6068.5	64923	66642	17	173	4698400	2870600	3683000	3497100	-42	-26
Pcbp1	P60335	Poly(rC)-binding protein 1	6	4	5	6	33.1	18	6	14	12	67576	18309	147580	136910	330	126	16109000	13123000	12561000	13641000	-20	-28
Aff4	Q9ESC8	AF4/FMR2 family member 4	7	2	5	6	9.6	16	1	6	6	25213	0	12746	8648.5	73	27	3436400	2049700	2119700	2361800	-115	-34
Rfc4	Q99J62	Replication factor C subunit 4	6	6	5	6	21.7	12	2	9	10	74241	4505.8	44998	29430	141	75	8689200	7175300	4615800	7936800	-79	-37
U2af2	P26369	Splicing factor U2AF 65 kDa subunit	9	4	5	6	32.6	27	4	17	24	47841	2190.5	13563	14026	-2	29	33184000	17880000	18748000	16038000	-35	-39
Nol8	E9QKD1	Nucleolar protein 8	12	7	5	6	14.9	14	3	6	5	2140900	28051	150370	151300	-81	83	4596300	2511300	2658600	2770700	-108	-41
Rbbp4	Q60972	Histone-binding protein RBBP4	7	5	5	5	24.7	7	4	9	4	92508	14715	92205	88140	213	88	5158000	5422400	5515800	6050400	13	-46
Mark3	Q03141	MAP/microtubule affinity-regulating kinase 3	5	3	5	5	10	5	0	4	3	62958	5240.3	13990	14513	-44	-71	678380	344180	964580	640220	61	-50
Rfc5	Q9D0F6	Replication factor C subunit 5	7	5	5	5	29.8	16	7	1	11	34090	2139.6	5511.9	7085.3	-144	-89	7671300	5019200	4056000	5411500	-91	-52
Gsn	P13020	Gelsolin	10	6	5	6	25.3	14	5	3	3	115340	24872	92783	60113	166	-29	5456700	2929200	4540100	3053800	-27	-59
Aqr	Q8CFQ3	Intron-binding protein aquarius	8	6	5	5	8.8	7	1	3	5	535180	61884	69025	158340	-94	-14	2373300	2796300	2408800	2727000	4	-69
Larp1	Q6ZQ58	La-related protein 1	15	6	5	8	25.5	17	2	2	3	2635900	63410	178080	341530	-79	67	5854600	3290900	3375500	3105600	-89	-72
Strn3	Q9ERG2	Striatin-3	1	0	5	7	12.7	0	0	2	1	253290	256220	484020	1842900	201	54	0	0	455410	454990	168	-77
Mta2	Q9R190	Metastasis-associated protein MTA2	6	1	5	4	12.1	3	0	3	2	411120	38873	63516	165650	-76	57	695650	610170	910350	811160	36	-86
Racgap1	Q9WVM1	Rac GTPase-activating protein 1	7	5	5	5	19.4	6	0	3	3	1113100	114500	246380	217730	14	-30	1551300	1281300	1753700	1191500	20	-92
Nvl	Q9DBY8	Nuclear valosin-containing protein-like	18	5	5	7	29.7	31	6	4	8	172260	26369	32201	35715	-68	-116	11419000	5538900	5777900	4633200	-74	-93
Hnrnpr	Q8VHM5	Heterogeneous nuclear ribonucleoprotein R	6	4	5	5	18.8	6	1	5	2	6632.3	3561.2	17322	16143	312	-1	1443800	1248800	1880800	1153900	46	-98
Prpf6	Q91YR7	Pre-mRNA-processing factor 6	10	6	5	7	14.5	19	7	7	9	7340900	396660	845160	1337900	-16	23	3381500	6043400	6533900	4645100	94	-100
Ppp1r12a	Q9DBR7	Protein phosphatase 1 regulatory subunit 12A	8	5	5	7	12.4	15	4	5	6	89356	7817.3	25202	26888	16	-18	3889700	3643800	3033400	2409100	-55	-137
Synpo	E9Q3E2	Synaptopodin	10	4	5	6	14.3	11	1	1	4	257970	54510	115150	70709	70	-106	4388700	2807900	2768900	1763100	-96	-168
Hsp90aa1	P07901	Heat shock protein HSP 90-alpha	6	4	5	4	11.7	0	1	2	1	10791000	1458700	1321300	1940800	-10	2	282670	323130	262710	350180	-26	-179
Eif3f	Q9DCH4	Eukaryotic translation initiation factor 3 subunit F	8	5	5	4	31.9	15	2	5	7	41089	6052.2	21685	13798	115	-102	11557000	8483400	7108500	3542400	-52	-183
Actn1	Q7TPR4	Alpha-actinin-1	11	4	5	5	17.6	16	7	4	5	1956300	148040	177590	393940	-55	4	3369500	3135200	1916400	1796400	-120	-183
Prpf40a	Q9R1C7	Pre-mRNA-processing factor 40 homolog A	7	5	5	4	12.5	10	2	2	2	1233000	163420	273920	455810	19	8	3520500	3938500	3168600	2018600	-32	-198
Ighg1	P01869	Ig gamma-1 chain C region, membrane-bound form	6	6	5	5	38.9	2	0	0	0	78415	5693.3	15069	17053	-63	-55	435090	0	0	0	-159	-226
Hspa1a;Hspa1b	Q61696	Heat shock 70 kDa protein 1A	5	3	5	3	13.1	1	0	2	0	1644200	98683	76437	337460	-148	22	203310	481840	430130	302800	100	-266
Lmnb1	P14733	Lamin-B1	4	2	5	3	11.4	4	2	4	1	799750	177590	203110	339000	12	-26	861740	1470800	1228900	425470	62	-381
Actr10	Q9QZB7	Actin-related protein 10	0	0	4	5	21.8	0	0	2	10	83261	3640.3	13869	16335	-93	0	0	0	1626300	6319900	457	492
Ubr5	Q80TP3	E3 ubiquitin-protein ligase UBR5	0	0	4	10	6.1	0	0	1	12	89710	6692.4	11146	11513	-163	-148	0	0	2222700	4638800	517	443
Maged1	Q9QYH6	Melanoma-associated antigen D1	5	1	4	3	13.3	7	0	3	5	361640	83770	50013	170800	-101	-28	2209400	491200	1642600	6109900	-50	379
Hist1h1a	P43275	Histone H1.1	6	1	4	4	28.6	12	2	3	10	2546500	273950	472740	371970	-7	-47	18223000	2024300	13473000	16344000	-26	265
Zmynd8	Q3UH28	Protein Zmynd8	0	1	4	5	7.8	0	0	5	4	402800	83209	176800	136880	62	-52	0	330720	1301200	1946200	418	215
Nfia	Q02780	Nuclear factor 1 A-type	2	1	4	3	13.6	0	0	3	2	325150	45984	30363	106270	-166	-24	243790	0	1112300	1217300	302	172
Rpl13	P47963	60S ribosomal protein L13	5	3	4	4	24.2	11	2	4	9	19298	2396.8	10055	6649	51	-113	30302000	3470500	8552800	14128000	-104	142
Zc3h18	Q0P678	Zinc finger CCCH domain-containing protein 18	5	1	4	4	12.6	15	0	5	6	280580	30068	40207	25758	-98	-203	4259300	916830	3573300	2663200	-32	130
Rfx5	Q9JL61	DNA-binding protein Rfx5	0	0	4	3	7.9	0	0	4	2	36140	7654.2	12247	14536	5	-119	0	0	898380	994690	324	121
Rbm4;Rbm14	F7BGR7	Protein Gm21992	7	3	4	5	23.3	5	0	2	3	121510	9717.7	15112	19561	-159	-93	1045700	0	1524400	875300	65	97
Snrnp70	Q62376	U1 small nuclear ribonucleoprotein 70 kDa	7	1	4	5	21	18	0	2	4	70727	13229	17782	10501	-12	-263	12021000	2210200	5199900	4573800	-106	69
Top3b	Q9Z321	DNA topoisomerase 3-beta-1	7	1	4	3	10.7	6	0	2	4	20986	1791.4	10612	7374.8	47	-69	1684900	194610	451280	848460	-299	67
Gnl3	Q8CI11	Guanine nucleotide-binding protein-like 3	8	4	4	4	25.3	13	2	7	6	0	0	8000.6	3828.9	208	-107	3416700	1460600	2869500	2770000	-53	60
Polr2b	Q8CFI7	DNA-directed RNA polymerase II subunit RPB2	5	2	4	4	7	6	1	2	4	344090	15162	35015	39417	-158	-33	2242100	1291500	1891700	2161900	-25	34
LRWD1	Q8BUI3	Leucine-rich repeat and WD repeat-containing protein 1	2	1	4	2	8.5	2	0	4	1	80411	16701	31600	9852.6	68	-308	697300	504970	1135900	1096700	90	33
Eif3g	Q9Z1D1	Eukaryotic translation initiation factor 3 subunit G	6	3	4	6	24.1	10	3	7	11	116090	17500	32570	33964	-4	-83	5597900	3905900	5480200	7087900	-2	33
Cbll1	Q9JIY2	E3 ubiquitin-protein ligase Hakai	2	1	4	3	17.5	2	2	5	6	93287	13042	17130	24002	-70	-103	1163600	1120800	1651000	1832100	58	19
Stau1	A2A5S3	Double-stranded RNA-binding protein Staufen homolog 1	4	3	4	4	16.7	4	0	4	4	22450	11715	46007	14715	326	-182	1571200	1357100	1891700	2044400	36	13
Fyttd1	Q91Z49	UAP56-interacting factor	5	3	4	5	20.8	7	1	5	9	99233	5650.8	11182	12617	-185	-108	5201500	2486800	4447100	3518000	-27	10
Mageb4	A2A9R3	Expressed sequence CN716893	7	5	4	5	18.9	21	6	16	14	898180	135940	149340	82376	-33	-179	17548000	10098000	13622000	14729000	-21	9
Rbmxl1	Q91VM5	RNA binding motif protein, X-linked-like-1	5	5	4	5	16	31	7	9	16	115330	6643.3	9425	12480	-255	-133	31060000	17233000	14529000	31219000	-43	8
Paxbp1	P58501	PAX3- and PAX7-binding protein 1	8	2	4	3	11.3	8	0	3	3	0	0	4079.8	1877.8	79	-193	1545900	1748200	2205100	2360000	63	0
Prpf4	Q9DAW6	U4/U6 small nuclear ribonucleoprotein Prp4	7	4	4	4	22.8	6	1	1	4	116610	17150	31904	23712	-9	-150	1544400	1539200	1417100	2143200	-17	-4
Cbx8	Q9QXV1	Chromobox protein homolog 8	5	2	4	5	20.2	5	0	0	7	29662	0	0	0	-337	-233	1707000	1296300	1200200	1830100	-71	-12
Mark4	Q8CIP4	MAP/microtubule affinity-regulating kinase 4	5	2	4	4	11.3	2	0	1	3	260560	187090	20675	13729	-202	-507	549770	375620	1004500	767300	117	-15
Gatad2b	Q8VHR5	Transcriptional repressor p66-beta	4	2	4	3	11.9	4	2	4	1	12013	2482.1	9911.2	1326.7	117	-318	392110	600850	1162800	1036100	220	-15
Hnrpdl	Q9Z130	Heterogeneous nuclear ribonucleoprotein D-like	6	3	4	4	26.9	9	3	8	8	29623	11978	17141	3921.8	131	-412	4340700	3746500	6766100	4634000	62	-22
Ewsr1	Q61545	RNA-binding protein EWS	4	4	4	4	9.5	12	7	8	15	52916	1362.6	6577.5	1721.2	-178	-252	27396000	15177000	18804000	17949000	-18	-24
Dazl	Q64368	Deleted in azoospermia-like	5	5	4	6	28.9	6	4	5	6	76157	24560	31955	12536	81	-304	3292500	4241000	7891700	5138400	137	-26
Tpx2	A2APB8	Targeting protein for Xklp2	2	2	4	4	7.2	0	1	3	4	28370	27193	39673	7924.8	275	-403	396240	627250	618180	1017100	62	-27
Canx	P35564	Calnexin	5	1	4	3	9.8	5	0	4	1	8717.1	0	9218.3	5766.7	141	-42	2824800	382090	785750	719420	-285	-27
Rpn1	Q91YQ5	Dolichyl-diphosphooligosaccharide--protein glycosyltransferase subunit 1	8	1	4	2	18.6	11	1	3	1	0	0	15463	109920	362	460	2530500	464340	1206900	774610	-151	-47
Rbm39	Q8VH51	RNA-binding protein 39	7	1	4	5	21.2	14	1	6	7	0	0	2664.5	17082	-2	155	11467000	1902200	3089600	2055900	-191	-49
Sorbs3	Q9R1Z8	Vinexin	5	2	4	3	10.1	3	1	3	2	75441	2041	77202	55148	232	284	738590	557110	1063500	820160	65	-60
Prrc2c	Q3TLH4	Protein PRRC2C	7	7	4	7	3.8	5	4	2	9	4745700	36819	303890	885340	-53	209	1998600	3252600	1841800	3009300	-5	-77
Znf622	Q91VY9	Zinc finger protein 622	8	4	4	3	25.8	12	1	3	3	0	621.3	7532.4	13461	193	98	6868300	3511200	3588100	3221000	-96	-78
Ybx3	Q9JKB3	Y-box-binding protein 3	4	4	4	4	21.3	7	0	2	4	7157.1	0	29777	15487	398	138	2297600	1516500	2337800	1485600	4	-80
Tgm2	P21981	Protein-glutamine gamma-glutamyltransferase 2	6	2	4	4	12	6	0	5	4	5878600	91581	231500	775290	-82	98	1458400	951750	1007800	1027900	-85	-81
Myl6	Q60605	Myosin light polypeptide 6	6	4	4	5	48.3	10	3	5	7	119820	1909.2	31889	27051	-20	156	2760100	4718700	6539400	4216300	145	-85
Hnrnpul2	Q00PI9	Heterogeneous nuclear ribonucleoprotein U-like protein 2	5	2	4	4	7.1	2	0	2	2	0	0	13359	6932.5	326	-6	918690	870390	1171200	952080	26	-87
Wdr33	Q8K4P0	pre-mRNA 3' end processing protein WDR33	9	6	4	6	13.2	12	5	0	3	40947	0	5782.8	17269	-162	159	3596000	3802300	3122100	3341800	-38	-87
Cstf3	Q99LI7	Cleavage stimulation factor subunit 3	4	3	4	3	8.5	2	2	2	1	1255200	8314.4	42348	70515	-237	137	889880	1118400	857250	1079600	-42	-89
Col6a1	Q04857	Collagen alpha-1(VI) chain	7	5	4	5	9.2	10	4	4	3	156460	13584	30129	26210	-63	-99	5521300	3051200	2950600	2699300	-114	-89
Rbm10	Q99KG3	RNA-binding protein 10	7	5	4	5	8.9	9	3	5	5	46376	992.63	4341.6	5134.5	-237	-95	2553600	3830200	4293900	3341500	94	-90
Nid2	O88322	Nidogen-2	13	7	4	7	14.8	16	1	4	2	42973	2769.8	11624	14047	-26	6	6753000	3769000	3107700	3089900	-126	-102
Rbm27	Q5SFM8	RNA-binding protein 27	13	6	4	8	17.2	16	0	0	4	309950	42458	87352	122670	18	14	3933100	3247700	2826800	2578600	-78	-102
Mov10	P23249	Putative helicase MOV-10	8	3	4	6	11.7	7	0	2	1	22480	3715.1	23888	11211	225	-76	1782200	1365500	1127200	1168700	-96	-104
Rbm19	Q8R3C6	Probable RNA-binding protein 19	5	3	4	4	7	7	2	4	3	65384	9708.9	43678	30264	153	-20	1786800	1659500	1696900	1357900	-5	-116
Cdc40	Q9DC48	Pre-mRNA-processing factor 17	4	2	4	1	13.8	1	2	3	1	49132	8157.9	23218	28293	106	-13	282240	716250	780040	769430	186	-117
Wdr3	Q8BHB4	WD repeat-containing protein 3	7	2	4	4	11.3	15	1	4	3	258870	27666	58990	122640	-19	65	2465300	1965000	1666000	1556700	-73	-117
Ncbp1	Q3UYV9	Nuclear cap-binding protein subunit 1	5	4	4	5	8.9	5	3	4	3	720020	93806	186300	164040	9	-47	2114000	1949400	2054900	1509800	2	-122
Sf3a3	Q9D554	Splicing factor 3A subunit 3	7	4	4	3	20.4	7	1	5	5	1273700	181050	174210	458950	-37	1	4594300	4410900	4051600	3129400	-23	-126
Rbm6	S4R1W5	Protein Rbm6	6	4	4	4	7.4	6	3	4	3	60474	6213.2	16846	15097	5	-94	3348400	2639500	1870400	1913300	-126	-133
Cpsf1	Q9EPU4	Cleavage and polyadenylation specificity factor subunit 1	10	10	4	7	9.4	12	8	3	2	1307600000	1155700000	705510000	705850000	0	0	6834000	7504400	6380900	4354800	-7	-140
Gas2l1	Q8JZP9	GAS2-like protein 1	5	3	4	2	11.8	3	1	5	0	66869	16783	17667	15084	0	-230	821400	832720	728850	741910	-59	-144
Prpf31	Q8CCF0	U4/U6 small nuclear ribonucleoprotein Prp31	4	1	4	3	13	3	1	5	1	76029	7762.3	9726.7	34838	-162	38	1247400	1454200	1473100	1038100	24	-147
Ddx51	Q6P9R1	ATP-dependent RNA helicase DDX51	8	0	4	1	22.4	10	0	1	0	18127	7579.4	18803	10975	206	-173	3796100	0	924820	331260	-299	-147
Dnajc9	Q91WN1	DnaJ homolog subfamily C member 9	7	4	4	4	32	14	2	8	4	22199	1250.3	10912	6189.8	47	-75	2739200	2424500	2508800	1601600	-22	-153
Hnrnpul1	Q8VDM6	Heterogeneous nuclear ribonucleoprotein U-like protein 1	8	3	4	5	13.6	15	4	3	5	350860	53876	84889	101460	-11	-56	2381000	2707000	1896600	1814600	-43	-153
Cpsf2	O35218	Cleavage and polyadenylation specificity factor subunit 2	3	2	4	2	8.6	8	2	3	2	1711800	341130	515540	409430	30	-44	1438900	3161500	2495900	1965600	100	-160
Nfix	Q3TYK3	Nuclear factor 1	3	2	4	4	22.5	0	0	2	2	311130	85545	154660	236680	88	5	155270	0	371840	281090	102	-167
Rbm28	Q8CGC6	RNA-binding protein 28	5	1	4	1	8.8	4	0	2	0	10482	4256.1	7538.1	11032	71	-95	1385300	203350	409070	316610	-290	-170
Atp2a2;Atp2a1	O55143	Sarcoplasmic/endoplasmic reticulum calcium ATPase 2	6	2	4	3	9.6	13	2	6	3	94384	2117.2	13184	11293	-130	-8	4035900	2443400	2566400	1433000	-103	-176
Tpm1;Tpm2	F8WID5	Tropomyosin alpha-1 chain	6	3	4	3	17.8	3	0	0	0	528490	11150	62943	56998	-108	73	390450	0	289050	189050	-73	-209
Hp1bp3	A2AM62	Heterochromatin protein 1-binding protein 3 (Fragment)	3	0	4	1	37	3	0	0	0	92395	2230.5	13682	3539.3	-115	-210	392170	0	533530	0	34	-226
Jup	Q02257	Junction plakoglobin	4	3	4	2	7.4	8	8	15	3	22755	3924.5	13805	6680.6	106	-175	1385500	3725000	4720200	1661000	228	-233
Rbm17	Q8JZX4	Splicing factor 45	4	4	4	3	12.3	4	2	5	2	128200	2284.6	20022	12725	-111	10	1866200	2136700	1821400	1004700	0	-239
Prc1	Q99K43	Protein regulator of cytokinesis 1	4	3	4	1	11.4	7	0	5	0	23863	6773.7	4402.1	13020	-137	-128	1145100	615040	1466800	0	43	-378
Ccnk	O88874	Cyclin-K	3	3	4	2	12.3	3	2	5	5	426540	41733	58608	38264	-93	-165	2530400	4079800	2405000	852190	-15	-395
Vcp	Q01853	Transitional endoplasmic reticulum ATPase	13	5	4	1	23.2	20	6	1	0	176560	28078	64050	41628	50	-102	4970200	2844900	874630	643670	-358	-403
Zbed3	Q9D0L1	Zinc finger BED domain-containing protein 3	0	0	3	3	20.6	0	0	5	7	60949	8100.9	13038	8849.6	-55	-224	0	0	2992900	2638900	577	334
Rsl1d1	Q8BVY0	Ribosomal L1 domain-containing protein 1	7	0	3	4	24.3	9	0	4	6	665090	92741	126960	175710	-34	-32	5247600	0	2887600	2575300	-116	331
Tox4	Q8BU11	TOX high mobility group box family member 4	2	0	3	3	7.9	0	0	5	8	31474	2638.2	13093	12257	58	-14	451800	0	2395400	2527300	327	328
Dctn3	Q9Z0Y1	Dynactin subunit 3	0	0	3	3	17.6	0	0	3	2	31532	11338	11557	8690.7	26	-275	0	0	5368900	2409600	687	321
Rpn2	Q9DBG6	Dolichyl-diphosphooligosaccharide--protein glycosyltransferase subunit 2	4	0	3	2	12.7	4	0	5	2	100280	12475	13479	21112	-142	-120	3421700	0	1506700	2074800	-171	286
Kpna2	P52293	Importin subunit alpha-1	4	0	3	4	12.3	4	0	5	4	119740	11388	15981	19412	-138	-126	1051000	0	1294200	1862500	28	260
Sp2	Q9D2H6	Transcription factor Sp2	1	1	3	3	8.6	0	0	3	5	103060	15066	31382	35130	11	-54	313170	396850	1131900	2474400	261	252
Ints6	Q6PCM2	Integrator complex subunit 6	4	0	3	5	11	2	0	2	4	144680	10070	15405	30039	-175	-29	609340	0	2662600	1771500	298	243
Rpl7a	P12970	60S ribosomal protein L7a	6	2	3	5	21.4	15	1	2	3	42299	2426.5	6596.5	9474.4	-138	-58	16846000	1168000	4967700	4953200	-145	207
Mef2a	Q60929	Myocyte-specific enhancer factor 2A	0	0	3	2	11.2	0	0	5	2	152380	10438	11677	18218	-246	-122	0	0	1042000	1218800	366	173
Rpl27a	P14115	60S ribosomal protein L27a	3	3	3	3	22.3	6	0	2	4	45064	4463.6	11056	10783	-48	-105	12644000	2630300	4324100	10642000	-139	170
Znf512	Q69Z99	Zinc finger protein 512	4	3	3	3	11	9	1	4	7	96890	2828	12869	11258	-147	-41	1960500	968300	2827100	3313600	75	165
Srsf6	Q3TWW8	Serine/arginine-rich splicing factor 6	3	2	3	3	8.8	3	0	1	2	72883	20098	21765	21764	26	-179	1254100	387990	1141800	1624800	-38	156
Rcn2	Q8BP92	Reticulocalbin-2	3	0	3	3	15.6	2	0	2	5	16442	8339.3	13568	2031.7	157	-448	941700	0	646640	1107600	-122	149
Dhx30	Q99PU8	Putative ATP-dependent RNA helicase DHX30	8	1	3	5	7.8	9	0	2	2	269660	35540	63399	33945	-12	-165	3290500	279830	878150	1167400	-285	130
Srpk1	O70551	SRSF protein kinase 1	7	0	3	1	15.1	9	0	3	1	58550	7059.4	9326.2	11882	-130	-151	2121800	0	757940	1000500	-225	122
Rpl14	Q9CR57	60S ribosomal protein L14	3	2	3	3	17.1	9	1	3	6	106570	19940	22789	29455	-41	-127	34957000	3305100	3190500	10021000	-268	117
Zc3h13	E9Q784	Protein Zc3h13	4	1	3	4	3.6	2	0	1	4	31036	7879.3	9133.7	3860.2	-26	-355	705050	421620	1005100	1387000	61	115
Men1	O88559	Menin	4	0	3	4	8.7	2	0	3	5	76816	10626	32317	16154	81	-149	342320	0	1056200	967490	239	114
Cd2bp2	Q9CWK3	CD2 antigen cytoplasmic tail-binding protein 2	3	0	3	3	12.9	2	0	1	1	334040	26201	26297	52276	-195	-52	923080	0	1253300	953890	48	110
Rpl6;Gm5428	P47911	60S ribosomal protein L6	6	4	3	6	24.7	21	1	3	10	130970	6853.9	17521	21145	-138	-40	33296000	3068700	10553000	8658700	-90	108
Ints1	Q6P4S8	Integrator complex subunit 1	2	0	3	3	1.5	2	0	2	4	55669	8007.5	25786	16596	100	-106	639280	0	875980	929070	43	106
Ppp1cc	P63087	Serine/threonine-protein phosphatase PP1-gamma catalytic subunit	5	3	3	5	19.8	5	1	3	3	126400	0	11029	2450.2	-242	-170	1685500	735490	2552500	1998000	75	104
Rbbp7	Q60973	Histone-binding protein RBBP7	4	2	3	3	12.5	2	0	0	2	133030	3768.6	20951	11577	-103	-67	420360	0	559290	909070	25	104
Rpl24	Q8BP67	60S ribosomal protein L24	4	3	3	3	25.5	10	5	5	6	17342	0	3196.8	2381.2	-153	-175	17207000	2864500	4324000	7343300	-172	98
Rpl7	P14148	60S ribosomal protein L7	7	4	3	7	30.4	13	2	2	4	72893	0	19931	0	5	-233	14179000	2844300	10795000	7332100	-25	98
Ssb	P32067	Lupus La protein homolog	10	4	3	6	29.4	19	0	3	3	17621	0	0	0	-273	-233	10179000	3472800	2103400	9362500	-254	97
Utp15	Q8C7V3	U3 small nucleolar RNA-associated protein 15 homolog	4	0	3	3	13.4	6	0	2	0	69013	6940.8	22096	0	35	-472	1489000	0	1193300	866200	-53	92
Rangap1	P46061	Ran GTPase-activating protein 1	4	4	3	3	8.7	4	1	3	4	188380	57597	60149	17248	29	-352	1607600	940610	3154300	2167900	133	91
Prkra	Q9WTX2	Interferon-inducible double-stranded RNA-dependent protein kinase activator A	5	4	3	4	20.8	12	4	0	7	136440	16074	6882.5	4741.7	-346	-422	3325100	2659600	4075000	6085300	29	86
Hist1h1d;Hist1h1c	P43277	Histone H1.3	5	1	3	3	22.2	6	0	0	1	209580	8797.2	0	17819	-672	-101	3296200	480500	1413300	1343300	-174	85
Sycp1	Q62209	Synaptonemal complex protein 1	2	1	3	4	4.7	1	0	3	4	35926	3730.8	7647.3	4299.2	-95	-238	364160	503470	930930	1344600	197	77
Ppp2r1a	Q76MZ3	Serine/threonine-protein phosphatase 2A 65 kDa regulatory subunit A alpha isoform	0	0	3	3	7	0	0	4	1	13755	0	4154.7	3849	-65	-106	0	0	849420	827030	308	76
Bclaf1	Q8K019	Bcl-2-associated transcription factor 1	5	1	3	3	8.1	5	0	2	2	30601	0	1006700	2024100	594	696	1595300	250970	1175900	879920	-67	73
Zc3h14	Q8BJ05	Zinc finger CCCH domain-containing protein 14	3	4	3	4	9.7	2	1	4	2	0	4694.5	127200	439080	699	431	652540	493660	1100600	1185100	97	58
Frg1	P97376	Protein FRG1	3	2	3	3	15.5	4	3	4	8	0	0	49314	99391	567	442	610550	1906000	1896800	3403500	234	50
Srsf9	Q9D0B0	Serine/arginine-rich splicing factor 9	5	3	3	4	30.6	11	1	5	8	333560	0	48912	42988	-89	324	6245100	4171500	6956500	7966200	17	45
Mthfr	Q9WU20	Methylenetetrahydrofolate reductase	0	0	3	3	6.9	0	0	3	1	12908	0	66358	54946	474	363	0	0	820680	691630	299	35
Hnrnpd	Q60668	Heterogeneous nuclear ribonucleoprotein D0	5	4	3	5	28.2	12	2	10	14	0	0	111950	128980	686	489	15527000	12232000	8801400	27482000	-53	30
8030474K03Rik	E9Q4Y8	Protein 8030474K03Rik	0	0	3	3	9.9	0	0	5	2	146900	0	28252	18082	-66	165	0	0	706890	673670	264	29
Xrcc1	Q60596	DNA repair protein XRCC1	5	3	3	3	12.4	4	0	0	2	51647	0	21343	26269	78	227	1051100	878830	1494600	1621000	57	28
Rps13	P62301	40S ribosomal protein S13	5	3	3	4	30.5	10	0	3	3	6565.4	3475.5	79004	48588	574	207	19640000	9210800	26496000	15343000	11	21
Dhx8	A2A4P0	ATP-dependent RNA helicase DHX8	3	1	3	3	3.7	4	0	0	0	17138	0	13985	17162	157	156	662060	0	616210	657870	-50	20
Rps8	P62242	40S ribosomal protein S8	6	3	3	5	35.6	13	7	13	11	3085900	14273	59720	175710	-230	199	48343000	12118000	7533000	20874000	-138	18
Lrch4	Q921G6	Leucine-rich repeat and calponin homology domain-containing protein 4	0	0	3	2	10.3	0	0	4	2	2890000	67273	145520	589760	-108	105	0	0	1380300	647840	429	13
Srsf7	Q8BL97	Serine/arginine-rich splicing factor 7	5	4	3	4	19.1	10	2	3	6	103520	10551	47541	46532	86	48	9573400	6198100	20047000	10505000	78	12
Ppfibp1	Q8C8U0	Liprin-beta-1	6	2	3	4	11.9	6	1	4	4	0	0	37280	16174	511	144	1032800	912780	1178800	1515700	7	11
Nol11	Q8BJW5	Nucleolar protein 11	4	2	3	3	7.2	4	0	2	2	111050	2407.4	14464	45033	-148	238	1157300	404310	646030	854160	-162	8
Kif11	Q6P9P6	Kinesin-like protein KIF11	2	2	3	4	5.4	0	0	4	3	58065	0	15705	27686	1	239	187100	327490	916260	783440	288	7
Ddx27	Q921N6	Probable ATP-dependent RNA helicase DDX27	11	0	3	3	15.5	11	0	2	0	43470	307.87	4062	6849.9	-243	-10	3177900	0	493750	639250	-414	7
Srsf5	O35326	Serine/arginine-rich splicing factor 5	6	3	3	3	20.1	13	2	4	5	9406300	94705	525840	658410	-49	83	9556500	4488600	5201700	6777200	-70	2
Rpl27	P61358	60S ribosomal protein L27	5	3	3	3	36	9	3	1	5	93536	0	7679.4	10320	-252	53	25331000	13791000	8431400	21365000	-93	1
Rpl13a	P19253	60S ribosomal protein L13a	3	3	3	3	16.3	4	1	2	3	13365	513.75	5083.2	8551.7	-26	16	2897500	1429400	2841300	2003800	-20	-2
Ran;Rasl2-9;1700009N14Rik	P62827	GTP-binding nuclear protein Ran	2	1	3	3	14.8	1	0	2	2	2413400	34836	121270	263070	-123	123	262390	342330	1252800	770000	319	-4
Rps19	Q9CZX8	40S ribosomal protein S19	5	3	3	4	31.6	6	2	3	4	15193	0	12779	13855	151	116	5501900	5950300	8699400	8605600	64	-6
Rbmx	Q9WV02	RNA-binding motif protein, X chromosome	5	3	3	4	20.6	3	0	0	0	48024	0	48990	28635	233	248	664740	0	0	599320	-244	-9
Kpnb1	P70168	Importin subunit beta-1	5	2	3	3	6.8	5	0	3	2	118860	3123.5	25079	52656	-50	234	724780	445720	1110900	848640	74	-11
Vrk3	Q8K3G5	Inactive serine/threonine-protein kinase VRK3	6	3	3	3	22.5	9	3	3	8	4508000	79679	141220	483590	-130	81	3973500	2614100	3821000	3135900	-18	-22
Rfc3	Q8R323	Replication factor C subunit 3	6	5	3	4	19.4	12	5	5	6	2023900	49276	85534	235000	-149	72	5176000	4044000	6463600	5074800	27	-24
Kank2	Q8BX02	KN motif and ankyrin repeat domain-containing protein 2	3	3	3	3	5.1	7	5	2	6	3474.9	0	2873.1	3459.9	-22	-123	941320	2480600	2862900	2850500	202	-29
Npm1;Gm5611	Q61937	Nucleophosmin	6	4	3	5	37.9	28	5	9	15	671120	37905	26369	81830	-273	-41	10309000	8253500	5481300	8715100	-70	-37
C5	P06684	Complement C5	3	3	3	3	1.8	2	2	4	2	45306	0	10927	16810	-55	149	458150	1836600	3569600	2075900	410	-38
Ddx42	Q810A7	ATP-dependent RNA helicase DDX42	10	4	3	7	19.4	14	4	1	3	61070	12257	40166	36513	152	-18	3277100	2879800	1929000	3274200	-105	-40
Dhx29	Q6PGC1	ATP-dependent RNA helicase Dhx29	6	2	3	4	6.1	6	1	3	2	457710	41160	37163	175050	-191	64	2191400	1194600	1529600	1439100	-56	-43
Tjp2	Q9Z0U1	Tight junction protein ZO-2	6	2	3	4	10.3	6	0	2	3	433100	3178.7	21661	61379	-269	249	1591800	705170	1032000	950740	-92	-59
Nlrp4c	Q3TKR3	NACHT, LRR and PYD domains-containing protein 4C	7	1	3	2	8.5	9	0	2	1	67266	0	11041	9126.5	-113	36	2609400	420830	569670	659350	-338	-59
Smc5	Q8CG46	Structural maintenance of chromosomes protein 5	4	1	3	2	4.9	4	0	1	2	5290	1023.6	6513.3	9687	116	12	805560	459560	698950	713630	-66	-60
Tdrd1	Q99MV1	Tudor domain-containing protein 1	5	5	3	5	6.2	6	3	2	4	0	0	10947	8021.1	274	13	3029200	2027800	1415600	2072300	-158	-61
Ruvbl1	P60122	RuvB-like 1	1	1	3	3	8.6	0	0	3	0	51508	1440.1	10938	11180	-72	17	397410	460260	1609800	678300	287	-67
Baz1b	Q9Z277	Tyrosine-protein kinase BAZ1B	5	1	3	2	4.6	6	0	2	0	17990	5594.5	10867	9037	78	-171	1367100	363230	1029700	600450	-71	-71
Ppp1cb	P62141	Serine/threonine-protein phosphatase PP1-beta catalytic subunit	7	4	3	4	27.5	18	2	3	6	56431	23358	32881	127890	134	93	4614800	4332800	6050500	3949300	39	-73
Samd1	D3YXK1	Atherin	3	1	3	1	13.1	3	0	3	0	954630	52004	61533	204690	-151	47	387270	326800	933600	552070	180	-77
Rrp7a	Q9D1C9	Ribosomal RNA-processing protein 7 homolog A	8	2	3	4	34.3	13	0	2	2	1104700	236950	474750	663220	52	13	5151000	2480200	2756800	2179100	-122	-77
Rbbp6	P97868	E3 ubiquitin-protein ligase RBBP6	4	0	3	1	3.1	5	0	2	0	42405	10463	22214	19447	118	-110	759810	0	442610	453760	-150	-78
	P06330	Ig heavy chain V region AC38 205.12	5	5	3	4	57.6	5	9	7	10	0	0	10902	6555.8	269	-21	17304000	79577000	31911000	15343000	36	-83
Arhgef7	Q9ES28	Rho guanine nucleotide exchange factor 7	1	1	3	4	6.5	0	0	3	1	4457200	172360	435140	640050	-36	29	178500	223690	887780	476660	280	-90
	A0A0B4J1H6	Protein Igkv2-137	3	3	3	3	29.2	4	4	5	6	8389200	218540	231860	912890	-93	34	1726100	11008000	3305900	7220400	131	-90
Pcf11	G3X9Z4	Cleavage and polyadenylation factor subunit homolog (S. cerevisiae)	8	2	3	3	9.1	9	0	1	0	0	0	14305	10733	341	64	1722200	1156500	1042800	1127600	-102	-90
	A0A075B5V1	Protein Ighv1-31	4	4	3	3	43.9	1	3	2	5	31042	3227	6467.7	11985	-92	-39	3614900	15001000	7863300	8775600	112	-99
Ptbp1	P17225	Polypyrimidine tract-binding protein 1	6	2	3	2	25.6	7	0	0	2	2327800	84713	202210	344250	-54	42	2835500	1467700	1436400	1298100	-138	-99
Azi1	Q62036	Centrosomal protein of 131 kDa	5	1	3	3	9.8	6	0	2	0	11985	0	2748.5	4697.2	-132	-76	1045400	261070	791690	462910	-93	-103
Rps6	P62754	40S ribosomal protein S6	4	2	3	3	17.3	14	0	7	3	2522.5	587.85	4677.9	5835.4	83	-51	15055000	5303100	2897500	3913200	-236	-110
Eif3k	Q9DBZ5	Eukaryotic translation initiation factor 3 subunit K	4	4	3	4	21.1	3	4	2	3	0	0	23219	3767.1	443	-111	2323700	2894100	4418600	2282200	125	-110
Add3	Q9QYB5	Gamma-adducin	4	3	3	3	8.5	3	1	4	1	8013000	466400	579770	1629500	-35	25	872760	828920	768130	826520	-65	-112
Snrnp40	Q6PE01	U5 small nuclear ribonucleoprotein 40 kDa protein	11	10	3	8	53.4	18	11	4	10	1939700	86757	128760	266420	-92	13	6390700	14230000	7129500	7540200	19	-115
Thoc6	Q5U4D9	THO complex subunit 6 homolog	5	4	3	4	28	8	5	3	7	48198	3754	9192.2	9693.2	-99	-105	3973100	5128200	3152100	3630600	-52	-121
	A0A075B5N7	Protein Igkv6-13	3	2	3	3	34.4	1	3	0	3	546620	24471	57167	88576	-128	26	1151100	7164300	3951200	4589400	232	-123
Mmtag2	Q99LX5	Multiple myeloma tumor-associated protein 2 homolog	4	4	3	4	18.8	8	2	11	10	96380	0	3213.8	3398.9	-428	-130	3885900	6173300	2933500	4113500	-64	-126
Cep170	Q6A065	Centrosomal protein of 170 kDa	2	4	3	4	4.1	2	4	1	3	1373600	109950	190050	412960	-25	35	708800	1309500	955580	1065800	48	-128
Pcbp2	Q61990	Poly(rC)-binding protein 2	4	4	3	4	19.3	3	2	6	4	24554	3981.4	20836	32021	186	105	2058000	2467900	1812700	1788900	-17	-133
Atxn2l	Q7TQH0	Ataxin-2-like protein	6	4	3	4	9.2	9	2	2	3	30927	3133	11634	6248.4	34	-153	2638800	2449600	2396000	1746200	-24	-139
Sf1	Q64213	Splicing factor 1	5	4	3	2	13.7	6	2	3	1	37176	0	0	8411.1	-382	21	2598400	2752300	1843000	1921300	-68	-140
Kat7	Q5SVQ0	Histone acetyltransferase KAT7	2	0	3	1	7	2	0	2	1	203360	23971	44132	48679	-39	-56	236420	0	370910	334920	59	-143
Rbm5	Q91YE7	RNA-binding protein 5	5	3	3	2	8.2	5	0	0	1	222520	51573	47374	77221	-40	-84	862840	950890	850770	818410	-33	-144
Zfp219	Q6IQX8	Protein Zfp219	2	1	3	2	8.4	1	0	4	2	36005	8926.8	19680	23984	112	-54	253810	328710	388530	422390	54	-149
Myl12a;Myl12b	Q3THE2	Myosin regulatory light chain 12B	6	4	3	4	40.1	11	3	4	4	1931400	1492600	557540	1141500	33	-20	4744400	3424900	4455400	2148700	-10	-155
Skt;Etl4	A2AQ25	Sickle tail protein	3	2	3	3	4	2	0	4	2	1238700	158570	53640	293700	-183	-31	1070900	1419800	1437400	963470	47	-164
Myl9;Myl12a	Q9CQ19	Myosin regulatory light polypeptide 9	6	4	3	4	40.1	2	0	0	1	5695.5	4426.3	14837	12460	288	-74	893120	593720	0	522630	-318	-190
Taf15	Q8BQ46	Protein Taf15	3	2	3	3	8.8	3	0	1	2	40239	1960.1	6093	7984.4	-157	-66	326660	0	335770	235500	-13	-197
Wdr43	Q6ZQL4	WD repeat-containing protein 43	3	2	3	2	4.4	3	0	3	1	95592	10044	11441	28605	-171	-35	864750	558910	671120	476600	-91	-201
Hist1h4a	P62806	Histone H4	3	2	3	2	29.1	8	7	8	6	17608	0	9731.3	11477	63	81	3314700	8402400	3602600	2760700	11	-238
Ighg2c	P01864	Ig gamma-2A chain C region secreted form	2	2	3	3	14.6	1	1	3	5	29762	1905.7	4749.4	6650.6	-147	-91	1842300	4425400	2707900	1835600	75	-241
	A0A075B5V6	Protein Ighv1-42	3	4	3	3	54.1	0	2	1	2	51582	6876.2	5304	12806	-213	-135	0	1220600	636360	538150	238	-292
Ighg;Igh-1a	P01863	Ig gamma-2A chain C region, A allele	3	3	3	3	14.8	2	2	4	3	18139	939.78	5055.4	3763.2	-72	-143	1050900	4617900	2755000	1362700	169	-310
	P18528	Ig heavy chain V region 6.96	1	3	3	3	30.6	1	3	2	5	57496	1540.2	3661.6	2091.4	-309	-248	1219500	4556800	927490	1311100	-83	-315
Eno1	P17182	Alpha-enolase	1	2	3	1	15.3	1	3	2	0	432850	36518	51790	67951	-118	-56	560750	1108000	356640	322280	-118	-383
C4b	P01029	Complement C4-B	2	2	3	3	2.5	0	2	0	0	7752.3	3057	27754	18310	384	49	0	1010000	0	0	36	-446
Actbl2	Q8BFZ3	Beta-actin-like protein 2	4	4	3	4	19.1	2	3	3	0	285520	22315	21317	40275	-209	-77	186990000	55366000	28838000	163380	-50	-899
C1qc	Q02105	Complement C1q subcomponent subunit C	1	0	2	2	9.3	1	0	5	5	17225	668.04	4978.7	2951.5	-61	-169	11255000	0	43678000	12962000	97	584
Utp3	Q9JI13	Something about silencing protein 10	3	1	2	1	12.6	3	1	1	1	32290	2468.7	20092	6700	139	-114	366610	411850	472610	21760000	33	552
Smn1	P97801	Survival motor neuron protein	1	0	2	3	12.8	0	0	3	5	32131	1158.4	3093.6	4579.5	-246	-121	490780	0	7771100	5353100	525	466
Mob4	Q6PEB6	MOB-like protein phocein	0	0	2	3	22.5	0	0	1	4	2077000	3138700	1787800	997240	62	-38	0	0	1661800	3501400	465	391
Dek	Q7TNV0	Protein DEK	2	1	2	4	12.9	0	0	1	12	14163	0	2931.3	735.57	-136	-229	438940	449840	864340	5705700	115	379
Gemin2	Q9CQQ4	Gem-associated protein 2	0	0	2	2	17.1	0	0	4	3	513650	394690	251810	694310	65	-9	0	0	5613800	2878800	694	353
Apmap	Q9D7N9	Adipocyte plasma membrane-associated protein	0	0	2	2	4.8	0	0	2	3	2764.7	798	9255.9	3797.5	213	-135	0	0	3701600	2774000	623	345
Rpl3	P27659	60S ribosomal protein L3	8	1	2	6	27.3	37	0	6	17	158750	9953.4	24792	27711	-94	-40	45844000	1926000	5689300	20575000	-179	293
Set	Q9EQU5	Protein SET	1	1	2	3	23.2	2	0	3	5	528840	680460	527580	509530	103	-49	298720	389490	3078600	2920000	474	282
Sp1	O89090	Transcription factor Sp1	0	0	2	2	5.5	0	0	4	4	406230	65069	51013	97036	-110	-92	0	0	1296100	1973200	417	275
Lyar	Q08288	Cell growth-regulating nucleolar protein	3	1	2	2	12.6	8	0	1	4	2626200	122800	117270	281410	-132	-12	4821300	139130	2998400	1731800	-93	232
Rpl18a	P62717	60S ribosomal protein L18a	5	1	2	2	25	6	0	4	4	18315	464.97	4097.1	3788.8	-116	-114	3299700	442190	2046900	2347500	-104	224
Fbxo38	Q8BMI0	F-box only protein 38	0	0	2	3	6.3	0	0	4	5	49676	10282	11151	8463.1	-58	-262	0	0	1580900	1263200	454	182
Dido1	Q8C9B9	Death-inducer obliterator 1	2	6	2	11	8.1	1	1	0	16	402130	242620	23248	177870	-233	-105	360060	1782000	605350	6892500	88	180
Map7	O88735	Ensconsin	2	0	2	2	3.4	1	0	3	3	221090	52030	52532	109500	-19	-36	307450	0	1377900	1247600	314	178
Rpl10a	Q5XJF6	Ribosomal protein	8	3	2	5	35.5	20	0	2	8	338620	216400	144700	432750	59	-15	22457000	1829300	3361700	6092800	-228	163
Xlr3b;Xlr3c;Xlr3a	Q60595	X-linked lymphocyte-regulated protein 3A	2	0	2	2	14.6	1	0	6	5	5371.3	3425	3386.5	5906.1	-12	-172	290910	0	1832300	1148500	377	158
Rpl8	P62918	60S ribosomal protein L8	4	2	2	2	30	8	3	3	3	381970	62611	46401	103610	-121	-78	7279900	2939000	10800000	11225000	51	148
Mki67ip	Q91VE6	MKI67 FHA domain-interacting nucleolar phosphoprotein	7	0	2	4	31.5	8	0	1	2	98808	30386	15485	42217	-102	-110	2507200	0	1342400	1071700	-120	142
Strip1	Q8C079	Striatin-interacting protein 1	0	0	2	2	3.1	0	0	6	8	113560	15643	14672	21232	-149	-148	0	0	1197900	1057500	395	137
Angptl2	Q9R045	Angiopoietin-related protein 2	0	0	2	2	5.9	0	0	4	3	217850	59742	53379	23383	-13	-306	0	0	1097000	1017500	374	129
Gata4	Q08369	Transcription factor GATA-4	2	1	2	2	8.6	3	1	4	6	39431	5141.2	7289.7	4176.9	-116	-283	1392000	1483500	3451300	3753800	176	120
Taf1	Q80UV9	Transcription initiation factor TFIID subunit 1	0	1	2	4	3.3	0	0	0	4	1258500	62297	88587	122330	-115	-43	0	294830	525140	1140900	196	115
Hnrnpab	Q99020	Heterogeneous nuclear ribonucleoprotein A/B	3	2	2	3	15.8	6	1	4	4	8702.9	2512	7686.3	3043.8	106	-253	2437200	1980700	1933900	4726500	-40	109
Rps17	P63276	40S ribosomal protein S17	6	3	2	4	49.6	23	1	3	3	10924	0	6443.3	3063.8	44	-148	13753000	2607000	2655600	6153500	-242	100
Gnl2	Q99LH1	Nucleolar GTP-binding protein 2	6	0	2	2	10.6	9	0	3	2	9227.2	2018.2	4761.1	3677.5	3	-195	2977900	0	952040	876200	-247	98
Tmpo	Q61033	Lamina-associated polypeptide 2, isoforms alpha/zeta	2	0	2	2	6.2	3	0	3	3	39741	34230	26637	10371	159	-386	523100	0	498520	870560	-47	93
H1fx	Q80ZM5	H1 histone family, member X	2	1	2	2	11.7	1	0	0	4	0	0	34453	0	499	-233	951040	268180	519880	972880	-173	85
Ddx10	Q80Y44	Probable ATP-dependent RNA helicase DDX10	6	0	2	2	10.3	10	0	4	3	9847.6	0	2977.8	0	-93	-233	1796300	0	835040	826200	-173	74
Gar1	Q9CY66	H/ACA ribonucleoprotein complex subunit 1	3	2	2	2	20.2	3	1	2	2	681390	286970	214040	205060	27	-105	6336300	1497900	1317200	3027200	-285	73
Patz1	Q9JMG9	Protein Patz1	1	1	2	2	6.7	1	0	1	3	56761	111150	134550	98344	346	-134	384940	445430	807520	1157300	142	71
Eif4g1	Q6NZJ6	Eukaryotic translation initiation factor 4 gamma 1	8	0	2	4	7.3	8	0	0	1	0	57083	44698	27236	545	-274	1478000	0	628350	814880	-207	66
Leo1	Q5XJE5	RNA polymerase-associated protein LEO1	4	0	2	1	10.9	7	0	2	1	107280	136930	125220	54350	213	-237	2271100	0	641350	791950	-280	60
Dcaf7	P61963	DDB1- and CUL4-associated factor 7	1	0	2	2	8.2	0	0	3	2	130300	254910	71681	120780	109	-158	328580	0	592390	786370	94	58
Rcl1	Q9JJT0	RNA 3'-terminal phosphate cyclase-like protein	4	1	2	3	13.4	5	1	1	2	20339	12452	11964	2362.2	84	-490	2633600	680190	1655500	1567100	-91	58
Fkbp6	Q91XW8	Inactive peptidyl-prolyl cis-trans isomerase FKBP6	3	1	2	2	10.1	4	1	5	3	0	5101.8	0	0	-86	-425	3131600	2603900	10399000	4666500	175	56
Csnk1d	Q9DC28	Casein kinase I isoform delta	0	1	2	2	8.9	0	0	1	2	6111300	715860	743710	2459.1	-15	-850	0	651420	967260	1466800	347	53
Bop1	P97452	Ribosome biogenesis protein BOP1	4	0	2	2	9.6	6	0	0	0	197970	23653	23551	78537	-128	12	798410	0	580880	705960	-105	38
Ddx39b;Ddx39a	Q9Z1N5	Spliceosome RNA helicase Ddx39b	5	2	2	4	14.7	7	0	0	2	8874.7	0	3977	7045	-28	-4	2765900	1251500	1055800	2161800	-199	37
Rps10	P63325	40S ribosomal protein S10	4	2	2	3	23.6	10	1	4	6	1255000	502620	51439	440080	-196	-53	15016000	3922400	4939300	7317300	-131	34
Rbfox2	Q8BP71	RNA binding protein fox-1 homolog 2	1	0	2	2	9.4	0	0	3	0	3637.3	2142.5	1821.9	2912.8	-81	-240	438670	0	1028800	677540	163	32
Eif4a1;Eif4a2	P60843	Eukaryotic initiation factor 4A-I	6	3	2	3	20.2	7	3	2	3	20878	1850.7	2570	1168.6	-226	-293	1954300	1511000	2243700	2428400	32	32
Tceb3	Q8CB77	Transcription elongation factor B polypeptide 3	2	0	2	2	3.5	2	0	0	2	0	0	8948.9	6130	229	-33	494720	0	263170	676090	-142	30
Nxf1	Q99JX7	Nuclear RNA export factor 1	7	4	2	3	18	10	1	2	8	0	0	2902.1	6689.4	14	-14	1729900	1020300	1813700	1827500	7	29
Cdk9	Q99J95	Cyclin-dependent kinase 9	4	4	2	3	14	6	0	2	3	19499	0	4366.3	976.92	-113	-226	2258000	1404200	1674000	2185700	-49	29
Ascc2	Q91WR3	Activating signal cointegrator 1 complex subunit 2	6	0	2	2	15.5	10	0	0	0	6619.1	1031	6369.8	3304.2	93	-173	2696300	0	683220	664900	-301	28
Tra2a	Q6PFR5	Transformer-2 protein homolog alpha	3	1	2	1	16	5	0	3	3	34628	4270.8	2231.6	2782.8	-312	-324	1660700	608650	597560	1246400	-239	27
Ddb1	Q3U1J4	DNA damage-binding protein 1	2	1	2	3	5.4	1	0	1	2	22145	32190	21768	6483.1	207	-462	857550	1124200	1254700	1857300	71	23
Rps11	P62281	40S ribosomal protein S11	4	3	2	3	24.1	6	2	3	5	11731	3881.9	7749.1	7419.3	70	-153	4720600	3373400	5482100	5537700	26	23
Xrcc5	P27641	X-ray repair cross-complementing protein 5	3	0	2	2	5.9	2	0	2	2	16201	2821.4	4526.3	2427.4	-74	-287	392440	0	396620	658160	-28	21
Alyref;Alyref2	O08583	THO complex subunit 4	4	1	2	3	22.4	5	0	1	5	38394	3895.3	2512.6	3413.4	-316	-288	1104800	955740	1437400	1695900	42	19
Polb	Q8K409	DNA polymerase beta	4	2	2	4	17.9	4	0	1	3	15526	1426.1	2722.7	2396.4	-164	-228	1537000	1227400	1386000	1914600	-19	13
Rps15a	P62245	40S ribosomal protein S15a	4	3	2	2	37	7	1	1	3	1767.5	1322.8	1697.3	2318.4	-55	-226	3587500	3735300	2492800	5752400	-88	13
Ccnt1	Q9QWV9	Cyclin-T1	4	1	2	2	9.1	6	1	1	1	110070	0	0	5797.6	-573	-41	951180	340660	766730	810740	-87	7
Snrpb;Snrpn	P27048	Small nuclear ribonucleoprotein-associated protein B	4	3	2	3	13.4	13	9	5	11	7787.4	0	2150	1005.5	-119	-224	12625000	10808000	13050000	14954000	9	4
Pura	P42669	Transcriptional activator protein Pur-alpha	4	1	2	2	24.3	12	0	4	9	2823	0	3402.4	1628.7	19	-206	3961500	2705800	2123800	3650900	-133	1
Rpl17	Q9CPR4	60S ribosomal protein L17	7	2	2	3	41.8	17	3	4	5	15982	0	10491	8572.8	91	24	22870000	10049000	17382000	13441000	-15	1
Ide	Q9JHR7	Insulin-degrading enzyme	0	0	2	2	2.4	0	0	2	2	170750	42640	22742	18239	-121	-302	0	0	784980	623380	286	0
Lamb1	P02469	Laminin subunit beta-1	4	3	2	3	2.9	6	0	0	3	68041	3327.7	9767.6	3302.7	-143	-269	568230000	635130000	244160000	519280000	-2	0
Maged2	Q9ER67	Maged2 protein	2	0	2	2	6.7	1	0	2	2	NaN	NaN	NaN	NaN	#VALUE!	#VALUE!	235780	0	461190	622910	103	-1
Uba52;Rps27a;Kxd1;Ubc;Ubb;Gm5239;Gm7808	P0CG49	Polyubiquitin-B	2	2	2	2	32.5	4	5	8	6	14375	0	845560	1157400	690	674	5095000	7925300	13727000	11727000	125	-2
Dimt1	Q9D0D4	Probable dimethyladenosine transferase	3	1	2	3	10.9	5	0	3	3	85066	4417.2	18349	453170	-37	448	1152900	577400	821830	1058400	-100	-2
Rpl11;Gm5093;Gm10036	Q9CXW4	60S ribosomal protein L11	3	2	2	2	25.8	7	4	9	7	33892	0	208580	301660	481	580	40295000	35562000	35676000	42360000	-12	-3
Rpl12	P35979	60S ribosomal protein L12	5	4	2	4	45.5	15	3	5	8	0	0	19902	141710	407	500	36515000	22061000	30084000	29472000	-14	-4
Rps20	P60867	40S ribosomal protein S20	2	2	2	2	19.3	7	6	3	7	6309.6	3720	11601	112820	227	313	11562000	13182000	18796000	16679000	46	-8
Rps5	Q91V55	40S ribosomal protein S5	4	2	2	3	39	11	2	2	2	0	0	102930	77131	675	405	15717000	12779000	28578000	15691000	37	-9
Zbtb5	Q7TQG0	Zinc finger and BTB domain-containing protein 5	0	0	2	2	5.8	0	0	2	1	0	0	43689	43620	539	327	0	0	742620	597640	276	-10
Fbll1	Q80WS3	rRNA/tRNA 2'-O-methyltransferase fibrillarin-like protein 1	4	3	2	3	16.2	2	1	2	2	2691800	11499	101630	334060	-153	280	16258000	4693800	6276700	6608300	-110	-10
Fam98a	Q3TJZ6	Protein FAM98A	7	1	2	1	25.4	10	0	3	3	21179	7387.1	102820	188730	455	292	2540100	0	826850	591100	-248	-13
Ahdc1	Q6PAL7	AT-hook DNA-binding motif-containing protein 1	3	0	2	1	4.8	2	0	2	1	0	0	63053	61220	609	376	256530	0	559910	587610	124	-14
	P01837	Ig kappa chain C region	4	2	2	2	63.2	13	15	18	15	308690	769.73	53038	33582	-57	252	16612000	80953000	41228000	54932000	45	-14
Ranbp2	Q9ERU9	E3 SUMO-protein ligase RanBP2	2	2	2	5	2.7	2	1	2	6	765810	5520.1	40887	114900	-212	267	232410	674380	438580	1084500	95	-16
Znf687	Q9D2D7	Zinc finger protein 687	0	0	2	2	3	0	0	3	3	2377.9	3642.9	1336.5	23585	-80	63	0	0	574500	561060	218	-23
Rps26	P62855	40S ribosomal protein S26	2	2	2	2	20.9	1	0	0	3	0	0	8307.5	10888	214	68	586620	818960	1675200	1134000	222	-28
Magoh;Magohb	P61327	Protein mago nashi homolog	2	2	2	2	13	2	1	4	3	12155	0	17988	18447	253	171	410920	1429100	2573000	1800200	368	-31
Nmd3	Q99L48	60S ribosomal export protein NMD3	4	2	2	2	10.7	4	0	1	3	4128900	35895	47484	313470	-281	137	1419800	825000	870930	1115000	-123	-33
Phc3;Phc2	Q8CHP6	Polyhomeotic-like protein 3	2	1	2	2	3.8	2	0	4	3	15331	0	21185	40558	260	314	851180	556900	570580	871330	-121	-34
Rps14	P62264	40S ribosomal protein S14	4	2	2	4	30.5	6	1	3	6	2777400	27926	106110	279450	-148	154	16229000	15010000	983810	15674000	-464	-34
Plrg1	Q922V4	Pleiotropic regulator 1	5	2	2	2	21.6	8	3	5	5	1785.8	3175.4	23241	12773	436	-25	3997300	2505300	4317400	2846900	2	-34
Col18a1	P39061	Collagen alpha-1(XVIII) chain	4	4	2	3	4.7	4	4	1	4	120920	0	9566.1	22951	-265	207	2085300	3351000	1275100	3770300	-83	-36
Rpl23a	P62751	60S ribosomal protein L23a	3	2	2	3	29.5	7	3	5	4	0	0	14541	15990	344	141	21659000	15350000	20300000	15413000	-3	-39
Sub1	P11031	Activated RNA polymerase II transcriptional coactivator p15	2	1	2	2	18.9	2	0	0	2	158690	23419	191670	163420	206	118	1013300	2176300	952720	2468900	-34	-41
Eif6	O55135	Eukaryotic translation initiation factor 6	5	2	2	3	31.4	10	0	0	2	0	0	16274	9677.5	372	45	2751500	3294000	3218600	3531200	35	-45
Erlin2	Q8BFZ9	Erlin-2	5	2	2	5	21.5	7	1	2	4	0	469.43	2515.3	6226.5	-14	-35	2399600	1308300	684320	1550500	-277	-47
Gm9493;Rps7	P62082	40S ribosomal protein S7	6	3	2	3	44.3	12	1	2	3	148790	25383	53466	119720	46	70	49274000	19478000	11831000	14405000	-91	-53
Blm	O88700	Bloom syndrome protein homolog	4	1	2	2	4.5	6	0	1	1	7521400	79919	79297	310820	-218	37	878930	444540	698010	699470	-92	-54
Sdpr	Q63918	Serum deprivation-response protein	0	0	2	1	5.3	0	0	3	0	122930	0	6229.1	5703.3	-356	-44	0	0	330520	503160	107	-55
Eif3d	O70194	Eukaryotic translation initiation factor 3 subunit D	5	4	2	2	13.5	10	6	7	2	13462	0	6212.8	6823.2	8	-10	8215300	3888400	3964300	3926100	-102	-55
Wdr61	Q9ERF3	WD repeat-containing protein 61	6	2	2	2	33.4	15	0	1	0	184090	3031.9	12387	43221	-266	208	2114700	758500	1652600	991420	-40	-55
Col14a1	Q80X19	Collagen alpha-1(XIV) chain	7	5	2	2	6.7	9	0	0	2	897100	19312	16867	97670	-375	64	1296300	1023700	767430	1182300	-146	-56
Cpsf3l	Q9CWS4	Integrator complex subunit 11	1	0	2	2	5.2	0	0	2	2	7115.4	3336	16705	16317	299	13	232040	0	933570	493350	274	-60
Ythdf2	Q91YT7	YTH domain-containing family protein 2	2	1	2	2	6.6	2	0	0	1	49757	0	5144.1	5547.7	-214	-48	255630	387860	394790	640230	53	-61
Snrpd2	P62317	Small nuclear ribonucleoprotein Sm D2	4	3	2	3	39	8	1	2	3	209470	21730	141220	161920	130	126	1616700	2207400	4890700	2190800	210	-64
Gm8991;Gm6793;Gm9242;Hnrnpa3	J3QNY1	Protein Gm9242	6	4	2	5	30.7	13	2	5	8	99402	5441	15905	31598	-98	65	9561100	11517000	8416300	8522400	-5	-70
Sirt1	Q923E4	NAD-dependent protein deacetylase sirtuin-1	1	1	2	2	4.4	0	0	2	2	27180	0	2343.1	3923.4	-265	-100	1269000	1228500	1187500	1265100	-32	-71
Cgn	E9QMC1	Cingulin	12	3	2	4	16.6	13	1	2	4	0	3036.7	15426	24240	361	100	3891100	1506200	1173500	1515600	-250	-74
Nfx1	B1AY10	Transcriptional repressor NF-X1	4	0	2	1	6.4	5	0	2	0	85213	0	5412.5	3594.7	-295	-118	869010	0	560280	460400	-136	-75
Cpsf4	Q8BQZ5	Cleavage and polyadenylation specificity factor subunit 4	3	3	2	3	24.6	8	1	3	8	9342.5	0	9380.7	19056	135	175	1112000	1991800	2413400	1881100	139	-79
	P01635	Ig kappa chain V-V region K2 (Fragment)	2	2	2	2	20	2	6	6	3	186070	16617	11122	28616	-294	-110	1768800	13244000	10812000	8836100	302	-79
Wdr46	Q9Z0H1	WD repeat-containing protein 46	5	0	2	2	15	6	0	3	2	114190	15451	20474	27684	-80	-105	1239300	0	654940	453120	-173	-79
Hsf2	P38533	Heat shock factor protein 2	0	0	2	1	4.3	0	0	2	0	3179200	69714	106770	380270	-154	67	0	0	1087600	452480	373	-80
Ercc3	P49135	TFIIH basal transcription factor complex helicase XPB subunit	3	0	2	3	8.9	1	0	2	2	110160	8511.4	14224	14771	-148	-134	372940	0	355650	450920	-25	-81
Cpsf6	Q6NVF9	Cleavage and polyadenylation specificity factor subunit 6	3	3	2	2	9.4	7	3	2	3	119740	22089	12881	30323	-194	-133	1607000	1723900	2581700	1704300	88	-82
Jarid2	Q62315	Protein Jumonji	3	1	2	3	6.2	4	0	0	2	185600	4800.3	9732.6	31981	-321	81	1089900	569780	614470	771670	-166	-84
Zfp655	Q9CZP3	Protein Zfp655	2	0	2	2	5	0	0	3	4	19010	1152.1	8190.6	16641	9	107	209250	0	360340	434910	69	-89
Ppp1ca	P62137	Serine/threonine-protein phosphatase PP1-alpha catalytic subunit	5	3	2	5	18.5	2	0	1	2	47706	0	4009.4	4827.6	-260	-69	628120	434470	1198600	622510	129	-89
Nid1	P10493	Nidogen-1	8	4	2	4	9.5	7	2	1	1	695290	67170	109300	228330	-55	24	2252300	970980	821130	1016100	-216	-90
Rpl23	P62830	60S ribosomal protein L23	3	2	2	3	30.7	9	3	8	7	212230	9722.7	11370	56808	-304	91	6422800	7518400	2247700	5772000	-189	-92
Toe1	Q9D2E2	Target of EGR1 protein 1	3	2	2	2	12.3	3	1	2	3	15184	0	33139	21397	338	198	1020200	1155100	1182900	1112300	10	-92
Smg6	P61406	Telomerase-binding protein EST1A	4	0	2	2	4.9	4	0	2	0	16034	0	3462.9	6108.9	-123	-34	620900	0	712680	427190	3	-93
Rplp2	P99027	60S acidic ribosomal protein P2	4	3	2	3	67	6	2	1	6	105040	7843.2	9941.9	38256	-223	49	2282900	2099300	1912200	1885100	-26	-97
Znf143	O70230	Zinc finger protein 143	0	0	2	2	4.7	0	0	3	3	156970	0	3688.4	2569.8	-490	-165	0	0	333400	420210	110	-98
Sf3b4	Q8QZY9	Splicing factor 3B subunit 4	3	1	2	2	11.8	4	2	3	3	1118700	80337	43804	218490	-223	2	1345600	2061300	2943500	1851800	142	-98
Polr2a	P08775	DNA-directed RNA polymerase II subunit RPB1	5	2	2	3	4.5	6	3	3	2	12881	0	3712.4	5056.4	-87	-64	617550	813680	878970	851260	57	-99
Orc3	Q9JK30	Origin recognition complex subunit 3	5	0	2	1	9.9	3	0	1	0	2012400	137760	128440	368670	-99	0	374490	0	274440	419200	-66	-99
	A0A075B5M7	Protein Igkv5-39	2	2	2	2	31.2	2	5	5	7	52204	3830.5	11215	9464.3	-67	-116	1483900	10884000	4833600	6561000	224	-100
Lrrc16a	Q6EDY6	Leucine-rich repeat-containing protein 16A	6	4	2	3	7.1	5	2	3	2	4666000	204850	374020	592140	-45	13	1182000	1073400	885920	1016500	-87	-100
	A0A0A6YYE7	Protein Igkv4-57 (Fragment)	1	1	2	2	39.3	6	7	9	8	4216800	2599000	355110	2123500	-44	-2	2182200	7533500	2165100	5306200	5	-105
Yif1b	Q9CX30	Protein YIF1B	2	0	2	2	8.7	2	0	1	1	471690	37170	70866	169470	-76	65	317800	0	619900	408550	111	-107
Caprin2	Q05A80	Caprin-2	5	1	2	3	7.7	5	1	1	0	1739800	666660	944300	842160	60	-15	1009700	565510	659410	663830	-130	-108
Nhp2	Q9CRB2	H/ACA ribonucleoprotein complex subunit 2	4	2	2	2	36.6	9	4	3	6	88714	2543.4	8895.3	22716	-213	100	6149900	5245300	2358900	3848100	-171	-111
Rpl9	P51410	60S ribosomal protein L9	7	2	2	2	43.2	13	3	1	4	7254900	451210	447300	1520200	-50	24	31811000	7013900	1372000	4695300	-429	-114
Rpl18	P35980	60S ribosomal protein L18	3	2	2	2	19.7	3	1	1	3	6849600	686990	654210	1844200	-23	14	1833300	588700	756930	664100	-201	-115
Soga2	Q3UHU5	Microtubule cross-linking factor 1	4	4	2	4	3.7	1	5	1	5	4075800	493920	549230	1522000	-18	22	866740	2005800	1135300	1637500	35	-115
Mta1	Q8K4B0	Metastasis-associated protein MTA1	1	0	2	2	3.6	1	0	2	1	3422200	245340	489780	701960	-19	14	300800	0	552370	385000	94	-117
Mcm3	P25206	DNA replication licensing factor MCM3	1	1	2	2	3.9	1	0	3	4	795640	42780	69750	160390	-118	39	160400	429360	443510	545250	136	-118
Cbx4	O55187	E3 SUMO-protein ligase CBX4	2	1	2	1	6.2	2	1	2	2	0	0	4879.2	5469.2	112	-52	366250	304400	494580	459210	41	-119
Rpl31	P62900	60S ribosomal protein L31	2	2	2	2	18.4	2	1	2	4	10304	0	7576.7	8118	76	18	721310	1646900	710410	1313600	-35	-121
Luc7l2	Q7TNC4	Putative RNA-binding protein Luc7-like 2	3	2	2	3	10.5	6	1	4	7	9623500	4443800	2291100	6835600	0	2	1883500	1768600	2330100	1393500	44	-121
Arglu1	Q3UL36	Arginine and glutamate-rich protein 1	2	2	2	2	5.9	2	0	0	2	724.61	419.49	694.86	3453.1	-82	-128	932420	1246600	991360	1037100	-10	-124
	A2AG58	Uncharacterized protein CXorf23 homolog	1	0	2	2	3.3	2	0	2	3	0	0	9844.4	9055	252	34	371220	0	362130	363000	-20	-126
	A0A075B5U4	Protein Ighv1-18	2	3	2	2	44.1	1	2	1	1	124370	0	10519	5107.9	-255	-62	3223500	13295000	3487200	6433200	17	-128
Znf609	Q8BZ47	Zinc finger protein 609	2	1	2	3	3.8	1	0	0	2	3716.2	0	3377.7	2595.7	3	-164	242570	317800	435980	442060	83	-131
Pogz	Q8BZH4	Pogo transposable element with ZNF domain	4	2	2	4	5.2	4	2	1	3	489210	21902	43431	106180	-171	65	770550	811670	874010	760290	-3	-133
Ngdn	Q9DB96	Neuroguidin	2	1	2	1	10.2	4	1	2	1	64343	28496	51623	83037	192	-6	1323300	455880	847910	542780	-123	-133
Pqbp1	Q91VJ5	Polyglutamine-binding protein 1	3	1	2	1	22.4	5	0	1	2	223860	17555	40126	24233	-76	-146	616400	512540	1008000	583280	97	-133
	A0A075B5K2	Protein Igkv9-124	2	2	2	2	33.3	4	4	3	6	0	0	3811.7	3946.6	61	-98	2017800	11825000	5171700	5723500	185	-134
Hnrnph3	D3Z3N4	MCG11326, isoform CRA_a	4	1	2	2	19	8	1	2	3	85691	7811.3	11388	9608.7	-149	-204	2523200	1567500	1215400	1166300	-145	-136
Mme	Q61391	Neprilysin	5	1	2	2	11.6	7	1	2	2	5559100	725620	36522	1845600	-345	11	2379600	1245400	1155000	969990	-149	-141
Ppp1r12c	Q3UMT1	Protein phosphatase 1 regulatory subunit 12C	2	0	2	2	4	2	0	0	0	33956	11162	3343.9	19112	-241	-122	450190	0	265930	324340	-127	-150
Eif3i	Q9QZD9	Eukaryotic translation initiation factor 3 subunit I	5	2	2	4	29.8	11	3	1	6	379470	79879	27178	201250	-209	-4	4778700	4291200	1325500	2696900	-246	-151
Hnrnpa2b1	O88569	Heterogeneous nuclear ribonucleoproteins A2/B1	5	3	2	5	23.2	4	3	3	5	7505800	539090	605930	1336300	-31	10	2437200	4896600	2296100	3102000	-13	-152
Actr2	P61161	Actin-related protein 2	3	1	2	1	9.6	3	1	1	1	32455	2501.9	6182.7	12150	-120	-12	824560	422600	522840	472360	-137	-156
Pnn	O35691	Pinin	4	1	2	1	9.7	8	0	1	2	98329	9468.3	7569.2	28418	-269	-27	1180000	285920	699480	384730	-145	-156
Sugp1	Q8CH02	SURP and G-patch domain-containing protein 1	2	2	2	2	5	0	0	3	0	984220	36991	55933	116060	-168	16	310200	384490	367840	431130	11	-158
	A0A075B5N3	Protein Igkv8-28	3	3	2	3	35.3	5	4	5	3	22357	2683.6	2518.1	4009.5	-237	-203	629120	3912300	1438900	2347800	170	-161
	Q8CIL4	Uncharacterized protein C1orf131 homolog	4	0	2	1	22.8	6	0	0	0	8533100	273560	389150	582880	-61	-8	600460	0	618850	298150	-22	-161
Mettl3	Q8C3P7	N6-adenosine-methyltransferase subunit METTL3	0	0	2	1	8.6	0	0	3	1	405740	53074	63588	30640	-69	-239	0	0	200930	287820	46	-165
Nkrf	Q8BY02	NF-kappa-B-repressing factor	3	1	2	1	7	3	0	0	1	267680	5803.9	12569	20983	-315	-21	493960	190550	242320	304290	-151	-170
Ehmt2	Q9Z148	Histone-lysine N-methyltransferase EHMT2	3	2	2	1	3.9	4	0	1	1	526810	59825	107440	118170	-34	-45	692990	869650	848250	662010	17	-172
Eif3m	Q99JX4	Eukaryotic translation initiation factor 3 subunit M	3	2	2	3	12.8	7	2	1	6	16442	673.08	2593.4	3117.4	-182	-164	3932700	4716800	1838600	2662600	-156	-173
Mfap1	Q9CQU1	Microfibrillar-associated protein 1	3	3	2	4	16.6	7	2	0	1	0	0	8534	6564.3	219	-20	2023300	2903500	1489800	1780500	-47	-176
Ywhag	P61982	14-3-3 protein gamma	2	0	2	1	9.7	0	0	0	2	32120	5636.5	14858	20229	80	-20	0	0	269730	267190	78	-179
Zmym4	A2A791	Zinc finger MYM-type protein 4	6	0	2	2	6.1	7	0	1	0	18209	2814.9	10944	11004	77	-44	1270700	0	898170	266350	-101	-181
Ints10	Q8K2A7	Integrator complex subunit 10	2	1	2	2	4.6	2	0	3	0	5683.5	0	15291	5832.5	297	-40	194640	200210	480470	277070	130	-189
Scaf11	E9PZM7	Protein Scaf11	2	2	2	2	2.1	3	0	1	1	618550	122190	68664	239030	-106	-24	967170	770210	936330	584010	-30	-191
	A0A075B5N9	Protein Igkv3-7	2	2	2	2	30	2	1	2	2	69303	3254.9	4122.1	6969.1	-314	-135	429350	4812700	2534100	2427200	350	-192
	P18525	Ig heavy chain V region 5-84	1	2	2	2	23.3	1	2	2	1	241320	41728	35213	97885	-107	-25	1517100	5327900	2933100	2606200	122	-194
Rbm22	Q8BHS3	Pre-mRNA-splicing factor RBM22	2	3	2	1	9	3	0	0	2	484910	400210	319790	611440	89	-18	995350	1355300	1445900	824910	64	-196
Hist1h1e	P43274	Histone H1.4	4	0	2	3	21.9	2	0	0	0	139480	43268	44659	27599	12	-236	698390	0	0	234310	-256	-199
Ckap2	Q3V1H1	Cytoskeleton-associated protein 2	1	0	2	1	3.8	0	0	2	0	7495.4	0	10895	4377.8	185	-82	146220	0	238060	203380	37	-205
Wt1	P22561	Wilms tumor protein homolog	1	0	2	1	7.8	0	0	2	0	18096	604.53	3577.1	8280.2	-141	6	208570	0	344080	197020	63	-206
Exosc8	Q9D753	Exosome complex component RRP43	3	1	2	3	41.5	3	0	1	1	16753	0	3970.7	1389.5	-107	-213	1038300	1239500	1253600	758860	26	-208
	P01655	Ig kappa chain V-III region PC 7132	3	2	2	2	53.2	5	6	2	3	62584	3545.2	2719.9	4384.1	-378	-222	2888700	11757000	1309700	3543900	-163	-209
Cad	B2RQC6	CAD protein	2	5	2	2	3.9	0	5	1	2	67201	10913	16833	11421	-12	-214	345420	1877400	767770	984060	151	-212
Ckap5	A2AGT5	Cytoskeleton-associated protein 5	2	3	2	3	2	2	0	0	4	60312	0	9429.1	4033.3	-129	-92	430280	1113500	702500	657140	70	-214
Gnai2	P08752	Guanine nucleotide-binding protein G(i) subunit alpha-2	5	3	2	3	18.6	7	2	1	3	1437900	169120	122940	384560	-84	-10	2867600	2205400	2251400	1133500	-59	-214
Hspa9	P38647	Stress-70 protein, mitochondrial	0	0	2	1	4	0	0	3	0	0	0	27241	6911.6	467	-7	0	0	296110	166240	92	-218
Wdhd1	P59328	WD repeat and HMG-box DNA-binding protein 1	1	1	2	1	2.9	0	2	1	2	9782.4	0	2885.7	4675.4	-101	-77	98981	402100	277300	339010	73	-218
Ywhaq	P68254	14-3-3 protein theta	2	0	2	1	9.8	2	0	1	1	870050	72581	83204	192820	-103	-2	80643	0	266560	136220	71	-223
Spty2d1	Q68FG3	Protein SPT2 homolog	5	2	2	2	9.5	5	1	0	0	164450	19164	53307	39031	23	-67	761090	568650	472030	435460	-142	-223
Dhx33	Q80VY9	Putative ATP-dependent RNA helicase DHX33	1	0	2	0	5.9	1	0	3	0	52350	2858.6	7805.4	18890	-146	56	118740	0	0	0	19	-226
Smg7	Q5RJH6	Protein SMG7	1	0	2	1	2.7	0	0	3	1	18877	3066.1	3774.4	5256.6	-141	-176	161680	0	1041100	0	335	-226
Cirh1a	Q8R2N2	Cirhin	2	0	2	0	4.5	2	0	3	0	9425.3	1281.1	2597	3437.4	-114	-174	679890	0	406230	0	-146	-226
Ints7	Q7TQK1	Integrator complex subunit 7	1	0	2	0	4.1	2	0	3	0	847410	711220	377220	984150	53	-16	0	0	646280	0	241	-226
Aplf	Q9D842	Aprataxin and PNK-like factor	2	0	2	0	5.4	2	0	2	0	8818.3	0	5689.3	5480.5	48	-51	376200	0	333070	0	-39	-226
Palm	Q9Z0P4	Paralemmin-1	2	0	2	0	12	2	0	1	0	570340	330140	203970	468250	37	-27	258300	0	0	0	-51	-226
Lsg1	Q3UM18	Large subunit GTPase 1 homolog	4	1	2	1	12.7	6	0	2	0	2455600	152100	110850	287060	-133	-28	568300	320110	435710	265040	-86	-232
Cebpz	P53569	CCAAT/enhancer-binding protein zeta	4	1	2	1	4.4	3	0	0	0	13198	0	2177.4	1625.3	-177	-207	507540	562960	395330	416520	-88	-232
Pkm	P52480	Pyruvate kinase PKM	1	1	2	1	4.5	0	0	2	0	29728	1672.2	3649.5	6875.5	-199	-76	124820	214150	178160	149890	25	-241
Hmbox1	Q8BJA3	Homeobox-containing protein 1	1	2	2	1	7.7	0	1	3	0	6198000	118260	39640	279520	-333	-9	630640	1126800	801490	604930	25	-243
Ehmt1	Q5DW34	Histone-lysine N-methyltransferase EHMT1	3	1	2	2	3.7	3	0	1	0	10194	4826.8	2863.3	7713.3	-108	-178	252660	617620	733080	429790	191	-244
Kdm1a	Q6ZQ88	Lysine-specific histone demethylase 1A	3	2	2	3	6.7	1	0	3	3	0	0	6197.4	6132.7	156	-32	315460	894980	799110	533110	173	-245
	A0A075B5R5	Protein Ighv4-1 (Fragment)	1	1	2	2	24.8	1	1	2	2	19887	0	3175.3	1187.7	-182	-219	1350900	4215300	2480200	1520600	107	-267
Slit3	Q9WVB4	Slit homolog 3 protein	8	4	2	4	8.3	10	1	1	2	156470	10748	22194	33569	-111	-18	2133300	1661700	848800	736700	-197	-267
Nrk	Q9R0G8	Nik-related protein kinase	1	1	2	2	1.7	0	0	1	2	497760	13314	14735	31027	-364	-61	391720	451390	387700	274130	-29	-270
Cp	Q61147	Ceruloplasmin	5	2	2	2	6.7	4	1	0	0	213490	26334	24843	96798	-134	28	1213000	1321100	625690	563030	-179	-290
Lima1	Q9ERG0	LIM domain and actin-binding protein 1	5	2	2	1	10.1	8	0	2	0	121500	17885	12834	41470	-201	-50	2244300	1174200	1338200	517690	-91	-291
Zcchc17	Q9ESX4	Nucleolar protein of 40 kDa	3	2	2	1	17.4	3	1	2	1	68459	0	13111	20121	-74	185	838800	2618700	912870	851570	-4	-310
Add1	Q9QYC0	Alpha-adducin	4	4	2	2	8.8	2	2	0	1	20791	2300.3	8847.1	3139.3	11	-237	534230	1125000	707580	445040	33	-321
Col6a2	Q02788	Collagen alpha-2(VI) chain	3	2	2	3	4.8	4	1	1	0	2172	907.78	4090.2	5204.1	66	-88	1613700	1064600	528910	414710	-262	-329
Luc7l3	Q5SUF2	Luc7-like protein 3	3	1	2	2	10	7	1	2	2	117680	1158300	56214	104720	89	-241	844970	901560	676860	346020	-81	-337
Ddx46	Q569Z5	Probable ATP-dependent RNA helicase DDX46	6	3	2	2	7.1	6	1	0	0	873940	682690	267760	776430	31	-21	1089300	1372400	811650	465810	-95	-346
Ywhaz	P63101	14-3-3 protein zeta/delta	3	2	2	1	22	3	2	2	0	158840	12900	10770	33233	-284	-44	270730	1210200	495690	354960	90	-379
Anxa2	P07356	Annexin A2	5	5	2	3	20.6	6	5	2	0	18140	1645.2	3884.2	6531.6	-130	-91	750810	2370200	655090	602800	-64	-379
	A0A075B5Y4	Protein Ighv1-81 (Fragment)	3	2	2	3	32.5	0	1	2	0	79936	3504.7	10591	11384	-155	-60	380510	1510300	911500	330150	180	-438
Myo5a	Q99104	Unconventional myosin-Va	8	3	2	4	5.7	9	2	0	0	5135	0	6375.4	3543.3	112	-119	3745100	10273000	374010	630500	-500	-588
Hmgb3	O54879	High mobility group protein B3	0	0	1	4	25.2	0	0	0	7	70511	5598.6	19154	20606	2	-17	0	0	159880	12005000	43	577
Psip1	Q99JF8	PC4 and SFRS1-interacting protein	0	0	1	6	22	0	0	1	16	87353	3522	13372	13282	-111	-30	0	0	290550	7429800	91	516
Tpr	Q7M739	Nuclear pore complex-associated intranuclear coiled-coil protein TPR	0	0	1	10	7	0	0	0	13	2982.8	756.68	3083.5	3855.2	-6	-127	0	0	343350	3838300	114	412
Ppib	P24369	Peptidyl-prolyl cis-trans isomerase B	0	0	1	3	15.3	0	0	0	3	6665.7	0	4799.1	4096.9	36	-91	0	0	547280	3155900	203	372
Rbmy1b;Rbmy1a1;Gm21693	O35698	RNA-binding motif protein, Y chromosome, family 1 member A1	6	0	1	5	16.6	10	0	0	7	2587.8	0	2508.3	2441.2	-37	-171	3232400	0	505340	2786300	-410	346
Dnaja1	P63037	DnaJ homolog subfamily A member 1	1	0	1	3	12.1	0	0	1	4	344910	18463	8283.7	52153	-446	-18	256780	0	1454200	2095000	355	289
Cbx3	P23198	Chromobox protein homolog 3	3	0	1	3	16.4	6	0	1	5	193980	60922	12692	92642	-268	-89	877410	0	1502700	1998300	98	277
Eif2s1	Q6ZWX6	Eukaryotic translation initiation factor 2 subunit 1	1	0	1	3	12.4	1	0	0	4	110310	41995	16504	76747	-115	-62	164060	0	434310	1623000	122	226
Pon1	P52430	Serum paraoxonase/arylesterase 1	0	0	1	1	7.7	0	0	2	1	8351.7	2622.2	7832.4	5233.2	115	-163	0	0	1250000	1621000	406	225
Fam172a	Q3TNH5	Protein FAM172A	0	0	1	2	9.4	0	0	0	2	230140	166560	71125	225750	24	-58	0	0	1602300	1516900	455	217
Ebna1bp2	Q9D903	Probable rRNA-processing protein EBP2	1	0	1	1	12.8	2	0	2	1	61086	5533.4	6776.1	10660	-197	-141	1168700	0	1023000	1436300	-46	204
Snrpa1	P57784	U2 small nuclear ribonucleoprotein A'	1	0	1	2	9.8	0	0	0	2	13765	0	2936.5	3460.3	-132	-122	94717	0	156520	1434300	35	202
Wdr5	P61965	WD repeat-containing protein 5	2	0	1	4	18.9	1	0	1	4	8746.2	4427.5	4799.5	5037.5	13	-237	726790	0	863470	1252500	9	180
Rpl15;Gm10020	Q9CZM2	60S ribosomal protein L15	5	1	1	1	17.2	6	0	1	2	51682	2303.5	8448.3	2541.4	-130	-259	15002000	331020	852050	1714000	-492	179
Mrto4	Q9D0I8	mRNA turnover protein 4 homolog	5	0	1	4	22.2	8	0	0	2	234020	37996	22811	71273	-167	-58	3309700	0	217840	1248800	-554	179
Akap8	Q9DBR0	A-kinase anchor protein 8	0	0	1	2	3.3	0	0	1	4	179930	36463	22342	43722	-130	-118	0	0	937590	1112600	341	151
Gsdma;Gsdma3	Q9EST1	Gasdermin-A	1	1	1	1	3.6	1	1	6	1	19756	3369.9	5591.5	1812.6	-65	-329	402330	0	5337300	1048300	514	136
Msi1	Q61474	RNA-binding protein Musashi homolog 1	1	0	1	3	13.2	1	0	0	3	38476	0	9333.9	3810.7	-63	-108	704860	0	794740	1021400	-2	130
Morf4l1	P60762	Mortality factor 4-like protein 1	1	1	1	2	8.8	1	1	2	3	206120	95485	59536	41128	16	-247	242520	658260	789850	2094500	217	130
Rpl19	P84099	60S ribosomal protein L19	3	0	1	1	13.9	9	0	0	2	0	176290	153540	225650	724	-64	8068100	0	325680	976110	-624	117
Dnajc12	D3Z0D9	DnaJ (Hsp40) homolog, subfamily C, member 12, isoform CRA_a (Fragment)	0	0	1	1	12.9	0	0	1	3	8195.4	0	4091.4	3375.8	-8	-132	0	0	568150	945130	214	107
Gata1	P17679	Erythroid transcription factor	0	0	1	1	6.5	0	0	3	1	347450	439420	225730	543970	109	-29	0	0	555290	920580	207	105
Rpl36	Q6ZWZ4	60S ribosomal protein L36	3	0	1	2	21	4	0	1	1	220800	257670	203760	170970	165	-117	2032400	0	1870400	862230	-6	89
Vezf1	Q5SXC4	Protein Vezf1	1	0	1	1	6.8	1	0	3	4	26129	1098.8	7000.3	5000.4	-56	-106	242240	0	911080	854080	255	86
Rps9	Q6ZWN5	40S ribosomal protein S9	8	2	1	3	27.3	11	0	0	1	43484	15957	26482	14167	143	-228	14372000	450150	319180	1246800	-698	82
Wdr82	Q8BFQ4	WD repeat-containing protein 82	1	0	1	1	6.4	1	0	1	3	0	0	4124.1	871.42	84	-228	536110	0	952650	840310	110	79
Rpl26	P61255	60S ribosomal protein L26	2	1	1	2	15.5	0	0	2	3	163340	28009	19230	20632	-153	-230	4896400	2107000	4732800	4466000	-8	70
Orc4	O88708	Origin recognition complex subunit 4	3	0	1	3	8.5	1	0	0	3	1963.8	4406.6	1691.4	2292	-60	-349	702240	0	618380	819970	-62	68
Serpinc1	P32261	Antithrombin-III	0	0	1	1	2.4	0	0	2	3	9412.5	0	3277.8	3897.7	-69	-103	0	0	1632300	811690	459	65
Rps2;Gm6576;Gm5786;Gm18025	P25444	40S ribosomal protein S2	5	3	1	3	21.8	14	1	1	4	26772	0	22492	0	197	-233	16335000	1711200	1003800	3201000	-462	62
Aard	Q811W1	Alanine and arginine-rich domain-containing protein	2	1	1	2	14.4	0	0	1	4	3941.8	0	0	0	-130	-233	291410	304250	987530	909010	245	61
Rcc1	Q8VE37	Regulator of chromosome condensation	1	0	1	2	6.4	0	0	0	2	0	0	200420	0	756	-233	263000	0	243780	796650	-24	61
Rps23	P62267	40S ribosomal protein S23	2	1	1	1	26.6	3	1	2	1	2679.3	0	7670.4	1724.7	175	-201	4748000	1840900	1068900	3466100	-296	61
Skp1	Q9WTX5	S-phase kinase-associated protein 1	1	0	1	1	7.4	1	0	1	3	0	0	6556.6	0	174	-233	164170	0	1259600	776510	379	56
Srsf10	Q9R0U0	Serine/arginine-rich splicing factor 10	6	2	1	2	37.4	7	0	2	2	3685.8	0	4260	0	52	-233	4477900	1991500	933960	3539300	-316	55
Rps24	P62849	40S ribosomal protein S24	5	2	1	3	35.3	5	0	1	2	3335.9	0	2667.5	0	-32	-233	7155700	755790	3516000	1592800	-105	48
Dhx37	Q6NZL1	DEAH (Asp-Glu-Ala-His) box polypeptide 37	6	0	1	3	7.7	6	0	1	0	23454	0	6238.1	0	-70	-233	1476400	0	349230	663130	-326	25
Hnrnpa1	P49312	Heterogeneous nuclear ribonucleoprotein A1	4	3	1	5	21.2	5	0	0	6	17921	0	5363.1	0	-54	-233	1663100	2734200	1174700	4274800	-77	21
Cirbp	P60824	Cold-inducible RNA-binding protein	3	1	1	1	26.7	4	1	1	1	13853	0	2344.5	0	-174	-233	433810	591810	1551700	1155700	259	18
Tra2b	P62996	Transformer-2 protein homolog beta	4	4	1	4	26.6	8	1	0	5	2439	2110.5	2761.2	1119	-13	-305	10460000	1880300	1258000	2813500	-351	16
Exosc9	Q9JHI7	Exosome complex component RRP45	2	1	1	1	18.2	5	0	1	1	32689	921.07	8404.8	981.19	-59	-255	371800	206990	314430	684840	-46	16
Mlec	Q6ZQI3	Malectin	2	0	1	1	10.7	4	0	1	0	7840.9	3978.9	3087.4	0	-64	-394	569940	0	1035000	655150	120	16
Nolc1	E9Q5C9	Protein Nolc1	3	0	1	1	4.7	5	0	1	1	8637.3	1086.4	4055.7	3327	-18	-173	637490	0	584380	654800	-52	15
Xlr5b;Xlr5c;Xlr5a	A2BI50	Protein Xlr5b	2	0	1	3	14.8	1	0	2	3	61371	56301	176550	165950	361	11	162050	0	511800	638580	158	6
Rpl22	P67984	60S ribosomal protein L22	2	2	1	2	18.8	2	2	2	4	3508.3	799.51	2639.6	2647.3	-39	-188	8133700	12869000	19012000	18636000	94	6
Rnf2	Q9CQJ4	E3 ubiquitin-protein ligase RING2	4	2	1	3	21.1	5	1	0	3	30224	5546.1	2081.2	2526.8	-289	-370	2855600	826400	349340	1332100	-457	3
Rpl37a	P61514	60S ribosomal protein L37a	1	1	1	1	19.6	1	2	1	1	0	18595	19566	15199	404	-237	398800	593350	469720	1068000	2	-4
Utp6	Q8VCY6	U3 small nucleolar RNA-associated protein 6 homolog	4	1	1	1	9.4	5	0	2	2	30345	8919.3	4226	3917.2	-167	-370	590920	236060	234680	656970	-189	-7
Dnah2	P0C6F1	Dynein heavy chain 2, axonemal	1	1	1	1	0.7	6	4	1	5	42843	3542.9	2191.4	3933.3	-346	-239	645280000	1054100000	0	174150000	-869	-7
2210010C04Rik	Q9CPN9	Protein 2210010C04Rik	1	1	1	1	4.9	13	9	12	11	73841	3079.7	7074.4	7746.7	-218	-113	42071000	162800000	154030000	107860000	25	-8
Mum1	Q6DID5	PWWP domain-containing protein MUM1	2	1	1	1	4.1	2	0	1	2	27812	6096.8	3261.6	2180	-212	-403	477840	567590	499940	990900	-26	-16
Exosc7	Q9D0M0	Exosome complex exonuclease RRP42	2	0	1	1	8.9	3	0	1	0	29537	26958	7409.5	4226.2	-59	-500	808280	0	1295200	580500	89	-20
Snrpd3	P62320	Small nuclear ribonucleoprotein Sm D3	3	2	1	2	31.7	3	1	1	1	38073	14666	8927.7	6292.4	-72	-364	8091300	5570200	6701800	7375300	-18	-21
Srsf2	Q62093	Serine/arginine-rich splicing factor 2	2	1	1	2	14.9	3	1	3	4	127680	70203	22479	29567	-83	-285	652500	1856700	2149900	2204000	233	-22
	A0A0B4J1N0	Protein Ighv1-76	2	2	1	2	25.5	2	2	1	2	109480	139540	27119	15950	-21	-459	823500	2080600	2370200	2647100	200	-22
Zfp825	K7N5X2	Protein Zfp825	0	0	1	1	5.9	0	0	0	2	48342	27260	890.46	3455	-409	-538	0	0	305820	559530	96	-24
Ascc1	Q9D8Z1	Activating signal cointegrator 1 complex subunit 1	3	0	1	2	10.1	3	0	0	0	12750	0	5376.7	6445.9	-6	-26	963390	0	740530	558000	-94	-26
Ints3	Q7TPD0	Integrator complex subunit 3	2	0	1	1	3.5	3	0	2	1	7359.4	0	4157.1	4705.3	6	-74	506020	0	544990	554680	-22	-27
Nop16	Q9CPT5	Nucleolar protein 16	3	0	1	1	27	6	0	2	1	7185.3	519.6	1047.7	1586.1	-149	-216	0	0	432600	550620	153	-29
Rbm8a	Q9CWZ3	RNA-binding protein 8A	3	1	1	2	32.4	7	2	1	2	5827.8	0	1344.3	1380.5	-124	-214	3035600	1873900	1369200	2167100	-165	-30
Rif1	Q6PR54	Telomere-associated protein RIF1	1	1	1	2	1.3	1	1	2	3	82561	73183	72167	62815	207	-155	222020	399820	594460	743130	163	-31
Try10	Q792Z1	MCG140784	2	1	1	2	8.1	9	8	11	10	253450	181670	67742	228270	6	-66	18261000	63187000	36349000	30428000	34	-31
Srp72	E9Q740	Protein Srp72	2	0	1	2	4.4	2	0	1	0	330850	113060	18961	32732	-254	-305	445480	0	386120	541740	-67	-36
Rpl35a	O55142	60S ribosomal protein L35a	1	1	1	1	8.2	0	0	1	2	307140	106130	149620	83967	88	-152	255300	1025800	1231300	1296000	322	-41
1810009A15Rik	Q9D937	Uncharacterized protein C11orf98 homolog	2	0	1	2	22.8	3	0	0	1	33291	5828.6	7955.3	13309	-72	-104	1203400	0	533940	519080	-213	-45
Tardbp	Q921F2	TAR DNA-binding protein 43	3	1	1	3	9.9	4	4	3	3	7102.6	1834.2	3849.6	4374	-12	-154	894920	1015100	514070	1244100	-165	-46
Sorbs2	Q3UTJ2	Sorbin and SH3 domain-containing protein 2	3	3	1	2	10.7	3	0	0	2	17406	4235.1	6546.6	12645	-11	-65	792120	487210	301900	787370	-229	-48
Vapa	Q9WV55	Vesicle-associated membrane protein-associated protein A	3	1	1	1	13.7	6	2	2	1	3401.3	0	349.38	656.32	-115	-230	2792300	1213900	1207400	1434900	-169	-48
Ankrd17	Q99NH0	Ankyrin repeat domain-containing protein 17	1	1	1	3	3.2	1	0	0	4	54027	13422	4164.9	23918	-268	-110	115500	317100	281020	612250	69	-49
Rpl30	P62889	60S ribosomal protein L30	4	2	1	5	51.3	7	3	0	5	10104	2071.7	2145.6	3665.7	-150	-199	2454800	1186700	277280	1375500	-457	-51
Atad5	Q4QY64	ATPase family AAA domain-containing protein 5	2	0	1	3	2.2	0	0	0	3	32523	0	3571.8	6084.7	-227	-35	299630	0	426230	508280	40	-52
Fn1	P11276	Fibronectin	5	6	1	6	5.5	1	4	0	4	39806	34597	45380	20732	242	-251	710850	2050000	624120	2170900	-63	-52
Aatf	Q9JKX4	Protein AATF	4	3	1	2	15.4	8	1	1	2	7798.7	0	8606.6	5593.5	134	-47	2060300	986050	653660	1154600	-251	-56
Rexo1	Q7TT28	RNA exonuclease 1 homolog	2	0	1	1	4.5	4	0	2	1	8887.2	577.05	882.26	1107.9	-175	-233	354730	0	443190	497020	29	-58
Igkv1-115	P01631	Ig kappa chain V-II region 26-10	1	2	1	2	32.7	5	5	2	6	184290	54489	0	43925	-655	-170	3510200	26542000	14854000	14607000	190	-62
Eps15	P42567	Epidermal growth factor receptor substrate 15	0	0	1	2	4.7	0	0	0	2	71875	60652	83949	51327	248	-166	0	0	516130	491110	192	-63
Ddx49	Q4FZF3	Probable ATP-dependent RNA helicase DDX49	1	0	1	1	2.1	2	0	1	3	32709	2207.4	3950	3304.7	-209	-225	287290	0	241850	488100	-38	-64
Gm10094;Sap18	E9Q317	Histone deacetylase complex subunit SAP18	3	1	1	1	27.3	4	0	1	1	2138.5	682.49	0	1738.1	-99	-218	618790	1371100	3849500	1454500	365	-65
Mum1l1	Q4VA55	PWWP domain-containing protein MUM1L1	2	0	1	2	3.2	3	0	1	0	9695.8	767.87	0	1206.6	-197	-241	273870	0	705410	484790	168	-65
Plxna1	P70206	Plexin-A1	1	1	1	1	1.1	3	5	1	4	NaN	NaN	NaN	NaN	#VALUE!	#VALUE!	15928000	40883000	6689200	15544000	-99	-67
Ctr9	Q62018	RNA polymerase-associated protein CTR9 homolog	5	1	1	1	6.6	6	0	1	2	8396.7	0	4530.5	7403.8	8	4	2046700	444730	422210	662600	-347	-67
Gtse1	Q8R080	G2 and S phase-expressed protein 1	1	0	1	2	4.5	0	0	2	2	11218	0	1373.1	2344.7	-186	-177	296170	0	289390	477430	-17	-68
Snrpe	P62305	Small nuclear ribonucleoprotein E	2	2	1	2	25	3	0	1	3	27185	0	817.87	2025	-321	-190	788070	792780	1902800	958020	170	-68
Smtn	Q921U8	Smoothelin	4	1	1	3	8.1	6	2	1	4	0	0	2525.4	2289.9	-12	-182	1388200	585310	506920	824000	-247	-69
Exosc6	Q8BTW3	Exosome complex component MTR3	3	0	1	2	14.7	3	0	2	1	62675	4858.2	5426.7	10453	-242	-131	418090	0	1004800	472560	174	-71
D2Wsu81e	Q3UHX9	Putative methyltransferase C9orf114 homolog	1	1	1	1	3.4	2	0	1	1	10258	1679.8	2555.7	1875.9	-130	-263	387730	538320	458600	721800	10	-84
Lsm14b	Q8CGC4	Protein LSM14 homolog B	1	1	1	2	13.4	1	0	1	2	64959	6480.5	4921.7	2776.5	-268	-387	726800	859190	892010	907770	18	-89
Cttn	Q60598	Src substrate cortactin	2	0	1	1	8.8	2	0	1	1	0	0	3732.3	3336.3	58	-133	446520	0	499480	427350	-16	-92
U2af1;U2af1l4	Q9D883	Splicing factor U2AF 35 kDa subunit	4	3	1	4	26.8	13	3	3	4	5415.5	8165.5	10794	3694.5	210	-371	15836000	13346000	20785000	8061100	21	-94
Thoc3	Q8VE80	THO complex subunit 3	3	2	1	2	11.4	3	1	0	1	19277	0	2657	3968.4	-206	-96	1424900	1253000	807880	1166000	-142	-96
Tmod2	Q9JKK7	Tropomodulin-2	3	1	1	1	14.2	4	0	1	1	40777	43266	38013	27316	208	-238	631840	198240	668420	446040	-18	-98
Ddx47	Q9CWX9	Probable ATP-dependent RNA helicase DDX47	2	0	1	1	6.9	2	0	0	2	7482.4	1426.1	3321.7	2658.9	-42	-215	392820	0	211760	416060	-119	-101
Dhx57	Q6P5D3	Putative ATP-dependent RNA helicase DHX57	4	0	1	1	4.9	5	0	0	1	118200	5049.6	4741.5	16938	-398	-39	1214600	0	434680	415890	-261	-102
Dsg1a;Dsg1b	Q61495	Desmoglein-1-alpha	2	2	1	1	1.5	5	6	6	3	9532.1	4648.9	3914.5	7381.8	-44	-179	825020	2205000	2320100	1905800	192	-103
Raver1	Q9CW46	Ribonucleoprotein PTB-binding 1	0	0	1	1	2.9	0	0	0	2	11567	1576.6	6239.1	2985.5	30	-213	0	0	71534	414440	37	-104
Elmsan1	E9Q2I4	Protein Elmsan1	2	0	1	1	4.7	2	0	1	1	12377	0	4915.1	2907.5	-24	-154	324180	0	660480	414150	125	-105
Polr1c	P52432	DNA-directed RNA polymerases I and III subunit RPAC1	2	0	1	2	22.3	2	0	0	2	0	0	6401.1	4613.3	166	-78	248990	0	615330	408270	149	-108
Pkp1	P97350	Plakophilin-1	1	1	1	1	2.1	0	4	3	4	5503.2	0	2910.1	5265.4	-41	-54	401920	793690	2799200	822860	388	-109
	P01644	Ig kappa chain V-V region HP R16.7	3	3	1	3	43.5	5	4	7	8	2100	966.36	1559.9	1500.7	-65	-243	5819400	15152000	7387900	8362600	36	-109
Vapb	Q9QY76	Vesicle-associated membrane protein-associated protein B	2	1	1	2	10.7	2	0	0	0	3872.3	0	2904.7	2393.1	-26	-174	755780	0	0	408100	-276	-109
Wdr89	Q9D0R9	WD repeat-containing protein 89	3	2	1	3	10.6	4	0	0	2	10471	0	2852.6	1923.2	-113	-192	1522500	880690	818140	854680	-150	-110
Dmrtb1	A2A9I7	Doublesex- and mab-3-related transcription factor B1	1	0	1	1	4.7	0	0	2	1	35238	0	2224.7	1114.9	-317	-222	78118	0	233880	396750	56	-114
Iws1	Q8C1D8	Protein IWS1 homolog	1	0	1	1	1.8	3	0	0	1	36592	3661.7	3599.5	6030	-245	-184	273400	0	415270	386920	50	-116
	A0A075B5T5	Protein Ighv1-5	1	1	1	1	13.3	1	3	2	5	NaN	NaN	NaN	NaN	#VALUE!	#VALUE!	851290	4673400	2008700	3455500	163	-121
Ccnt2	Q7TQK0	Cyclin T2	1	0	1	1	2.6	1	0	2	2	17285	0	3271.7	3260.4	-146	-142	305080	0	366410	376760	14	-122
Hnrnpa0	Q9CX86	Heterogeneous nuclear ribonucleoprotein A0	3	3	1	3	16.7	4	2	1	6	19989	0	4672.7	3435.2	-110	-128	1924700	6051100	999150	4157500	-133	-122
Zfp263	Q8CF60	Protein Zfp263	0	0	1	2	7.9	0	0	1	3	95051	10985	8243.4	16868	-243	-145	0	0	260260	375930	72	-123
Cherp	Q8CGZ0	Calcium homeostasis endoplasmic reticulum protein	3	2	1	2	3.4	5	1	1	2	23023	0	991.37	1655.2	-301	-204	718640	990030	781490	870630	-15	-125
Rpf2	Q9JJ80	Ribosome production factor 2 homolog	3	0	1	2	16	4	0	0	0	NaN	NaN	NaN	NaN	#VALUE!	#VALUE!	748570	0	307240	357940	-212	-127
Mak16	Q8BGS0	Protein MAK16 homolog	2	0	1	1	9.5	2	0	2	0	3722.4	1950.4	2761	1464.5	-36	-288	384250	0	401090	351790	-13	-130
Ctnnbl1	Q9CWL8	Beta-catenin-like protein 1	2	1	1	1	6.7	2	0	2	2	NaN	NaN	NaN	NaN	#VALUE!	#VALUE!	339630	423340	325350	517670	-23	-132
Wbp11	Q923D5	WW domain-binding protein 11	2	0	1	2	3.6	2	0	1	1	12603	4769.2	8607.7	0	82	-417	226440	0	213920	347610	-12	-132
Srrt	Q99MR6	Serrate RNA effector molecule homolog	4	2	1	2	6.6	4	3	1	3	76472	4593.5	8338.1	2820.7	-195	-335	450080	510120	662640	583140	49	-133
Ints9	Q8K114	Integrator complex subunit 9	0	0	1	1	3.5	0	0	2	0	4193.5	1135	3649	1424.1	6	-252	0	0	344920	343500	116	-136
	P01636	Ig kappa chain V-V region MOPC 149	2	1	1	1	25.9	4	3	2	2	NaN	NaN	NaN	NaN	#VALUE!	#VALUE!	880470	5799700	3400100	3588000	257	-138
Plec	Q9QXS1	Plectin	6	6	1	8	3.1	6	2	0	3	99893	84654	13287	6748.4	-145	-562	1756600	1839600	486480	1318900	-293	-138
Eif3h	Q91WK2	Eukaryotic translation initiation factor 3 subunit H	4	4	1	3	14.5	4	2	0	4	0	0	4072.3	1008700	78	667	2867400	2574100	3279000	1810500	21	-139
Gtl3	Q8BTU1	Cilia- and flagella-associated protein 20	3	2	1	3	15.5	2	2	0	2	0	0	564330	747230	827	653	773390	1133000	554110	903420	-113	-139
Prss21	Q9JHJ7	Testisin	1	1	1	1	4	2	1	3	1	0	0	4052.7	168580	74	518	217200	850660	1232400	761080	348	-140
Mepce	Q8K3A9	7SK snRNA methylphosphate capping enzyme	0	0	1	1	3.3	0	0	0	2	0	0	1069.9	13363	-70	111	0	0	235210	337620	61	-142
	A0A0A0MQC1	Protein Ighv3-5	1	1	1	1	13.1	1	1	2	3	0	0	4808.5	112430	110	463	517830	2061300	1323600	1473300	192	-144
	A0A0G2JDE1	MCG116913 (Fragment)	0	0	1	1	13.4	0	0	1	2	0	0	14536	11707	343	88	0	0	331030	334670	108	-144
Dnttip1	Q99LB0	Deoxynucleotidyltransferase terminal-interacting protein 1	3	1	1	1	16.5	3	0	0	0	118740	0	2296.2	46147	-531	337	3259500	1622100	1420800	1152900	-165	-147
	P03976	Ig kappa chain V-II region 17S29.1	1	1	1	1	11.5	2	3	3	2	17618	13329	116580	165180	503	191	496300	3036500	1498500	2016200	228	-148
Dnttip2	Q8R2M2	Deoxynucleotidyltransferase terminal-interacting protein 2	2	1	1	2	6.9	3	1	2	3	7346.5	0	18372	44646	317	333	910880	519930	840050	549480	-53	-150
Ppil1	Q9D0W5	Peptidyl-prolyl cis-trans isomerase-like 1	2	1	1	1	18.7	2	0	1	0	279270	0	21346	132430	-200	492	352280	869260	650700	732200	109	-152
Rpp30	O88796	Ribonuclease P protein subunit p30	5	2	1	3	24.6	5	0	2	1	2953.5	0	2070.2	31342	-65	263	989840	611770	785980	618230	-86	-154
	A0A075B5M1	Protein Igkv4-63	1	1	1	1	18.9	1	3	3	5	0	0	55130	86325	587	423	509040	3758600	2177000	2288500	286	-155
Clasp1	Q80TV8	CLIP-associating protein 1	4	1	1	2	3.2	2	0	0	0	0	0	19292	34629	403	284	316180	0	0	315290	-85	-155
Baz1a	O88379	Bromodomain adjacent to zinc finger domain protein 1A	2	0	1	1	1.6	2	0	0	0	68005	0	15761	38532	-25	303	237140	0	322110	308810	32	-157
Smc3	Q9CW03	Structural maintenance of chromosomes protein 3	2	1	1	1	3	2	0	2	2	11485	0	3303.9	57015	-89	371	340080	466720	425770	502550	18	-159
Gm10881	P01642	Ig kappa chain V-V region L7 (Fragment)	2	1	1	1	23.5	2	1	1	1	NaN	NaN	NaN	NaN	#VALUE!	#VALUE!	472720	3723400	5207200	2173300	469	-159
Lsm12	Q9D0R8	Protein LSM12 homolog	2	1	1	1	13.8	2	0	0	2	2306900	5051.9	12859	60193	-499	184	495830	672310	595230	624220	6	-160
Mphosph10	Q810V0	U3 small nucleolar ribonucleoprotein protein MPP10	4	1	1	1	8.2	10	1	2	1	18199	0	10479	35328	63	289	1290700	519930	624000	528880	-192	-163
Prdx1	P35700	Peroxiredoxin-1	1	2	1	2	11.8	0	0	1	2	320440	0	1393	35513	-704	292	410040	943530	678480	746270	80	-164
Nhp2l1	Q9D0T1	NHP2-like protein 1	1	1	1	1	9.4	1	2	1	1	0	0	29824	56140	477	366	480920	889990	1083100	705010	160	-164
Copa	Q8CIE6	Coatomer subunit alpha	2	1	1	1	3.1	2	0	1	2	0	0	4168.8	23878	88	213	387240	230010	249270	337760	-90	-165
	A0A075B5K0	Protein Igkv14-126 (Fragment)	2	2	1	1	20.3	4	5	7	5	9451.7	6862.6	8150.3	58866	100	136	590840	2379800	1630000	1463600	210	-167
Ints2	Q80UK8	Integrator complex subunit 2	0	1	1	1	2.3	0	0	3	2	15410	2795.1	79277	8089.3	478	-98	0	399220	425840	426640	148	-169
Hspg2	Q05793	Basement membrane-specific heparan sulfate proteoglycan core protein	2	0	1	1	0.5	2	0	0	0	24607	0	7346.1	50723	-44	350	424770	0	215700	279690	-136	-170
R3hdm4	Q4VBF2	R3H domain-containing protein 4	1	1	1	1	7.3	0	0	2	1	2147200	0	8826.5	61558	-580	378	235230	327590	525540	377840	130	-172
Polr2c	P97760	DNA-directed RNA polymerase II subunit RPB3	2	0	1	1	14.5	3	0	0	1	0	0	8957.2	70781	230	397	392110	0	426330	277380	-14	-172
Pno1	Q9CPS7	RNA-binding protein PNO1	1	1	1	1	7.3	3	0	3	4	0	0	29253	40133	473	311	245420	590880	733690	548470	195	-174
Exosc5	Q9CRA8	Exosome complex component RRP46	1	1	1	1	6.8	2	0	2	0	0	15473	99909	43206	670	-19	114140	287140	407470	341590	127	-176
	A0A0B4J1H8	Protein Igkv1-133 (Fragment)	2	1	1	1	18.3	3	2	3	3	102020	0	37064	27578	35	236	847800	6283100	2945600	3192700	236	-178
Gnai3	Q9DC51	Guanine nucleotide-binding protein G(k) subunit alpha	4	3	1	3	15.5	3	0	0	1	2363600	8369.8	3890.1	49348	-748	86	1079800	535550	0	503720	-355	-178
	A0A075B5N4	Protein Igkv8-27	4	2	1	3	42	6	2	2	7	1460600	0	76533	120980	-141	479	669780	1825200	923500	1078500	50	-180
Nudt21	Q9CQF3	Cleavage and polyadenylation specificity factor subunit 5	6	3	1	4	43.2	9	1	0	4	19452	0	23360	20710	243	190	2313600	2817200	0	1675500	-489	-181
Snrpd1	P62315	Small nuclear ribonucleoprotein Sm D1	4	1	1	2	37	6	0	1	0	1964100	63489	145480	400920	-80	79	2899200	1265200	514800	833170	-393	-184
Lyz1	P17897	Lysozyme C-1	1	1	1	1	8.1	2	3	6	3	19158	0	9013.6	24653	31	220	780680	3024600	907340	1761100	4	-185
Rbm12b2;Rbm12b1	Q66JV4	RNA-binding protein 12B-B	6	0	1	2	8.6	6	0	0	0	1296900	21082	8323.6	86787	-560	41	1194600	0	110400	257580	-374	-186
	P01843	Ig lambda-1 chain C region	1	1	1	1	16.2	1	1	3	2	1351000	51079	29330	221300	-302	61	457060	2491100	3667800	1383500	416	-187
	A0A075B677	Protein Igkv4-53	1	2	1	2	35.1	2	7	8	6	24934	0	3101.9	14210	-209	122	1019500	5660400	2794800	2834400	179	-187
Pcid2	Q8BFV2	PCI domain-containing protein 2	1	1	1	1	3	1	2	0	1	45882	3611.2	9435.6	35432	-84	146	386980	525940	566550	480520	57	-187
Ckap2l	Q7TS74	Cytoskeleton-associated protein 2-like	0	0	1	1	3.2	0	0	2	2	0	0	13908	12408	335	94	0	0	222040	253800	55	-188
Parp2	O88554	Poly [ADP-ribose] polymerase 2	3	1	1	1	10.2	3	2	1	0	1079700	23763	11323	123590	-477	85	0	0	315310	246860	100	-191
Znf512b	B7ZCR6	Protein Znf512b	4	1	1	1	7.6	4	0	0	1	0	0	23928	9685.1	452	46	1260400	882670	733880	635310	-148	-194
Srpk2	O54781	SRSF protein kinase 2	2	0	1	1	3.2	2	0	0	0	21849	0	2462.7	15356	-238	136	564010	0	280600	241600	-156	-194
Upf1	Q9EPU0	Regulator of nonsense transcripts 1	3	1	1	1	4.3	3	0	0	1	1896200	31413	76958	153070	-153	72	382000	293960	0	310890	-115	-196
Lamb2	Q61292	Laminin subunit beta-2	3	1	1	1	2.3	4	0	0	0	26826	0	26475	48102	221	340	514430	399910	362530	384340	-104	-196
	P01629	Ig kappa chain V-II region 2S1.3	1	1	1	1	11.6	1	1	2	2	15268	0	4906.1	13276	-47	108	327660	1880500	759020	1040600	154	-197
Eef2	P58252	Elongation factor 2	3	1	1	1	4.5	2	0	3	1	54694	27752	5340.6	116230	-224	53	309830	217140	289700	268060	-25	-198
Znf48	Q3US17	Zinc finger protein 48	1	1	1	1	2.7	2	0	2	1	254590	6791.9	17610	30520	-230	22	171220	98990	212810	236410	11	-198
Nacc1	Q7TSZ8	Nucleus accumbens-associated protein 1	1	0	1	1	2.5	1	0	2	0	1228000	57812	17282	183140	-383	19	311230	0	279900	229790	-34	-201
Hjurp	Q6PG16	Holliday junction recognition protein	1	0	1	1	2.5	1	0	0	2	0	14332	4940.2	37813	118	-32	101730	0	203000	210830	36	-202
Ppia	P17742	Peptidyl-prolyl cis-trans isomerase A	1	1	1	1	11.7	2	2	2	3	30305	0	1403.9	4476	-312	-80	423380	2034100	1214200	1095800	215	-202
	A0A0B4J1I9	Protein Igkv4-55 (Fragment)	2	2	1	2	27.4	1	2	0	2	74768	4749.1	21922	17005	23	-30	1024900	3646400	0	1845800	-345	-202
2310022A10Rik	Q8R3Y5	Uncharacterized protein C19orf47 homolog	1	1	1	1	4	3	0	1	1	3683500	642130	612770	2067100	-8	25	209970	156710	480250	238760	122	-203
Riok1	Q922Q2	Serine/threonine-protein kinase RIO1	2	0	1	1	4.4	2	0	1	0	52611	0	13347	9541.8	-28	43	168770	0	245610	208740	29	-203
Ccar1	Q8CH18	Cell division cycle and apoptosis regulator protein 1	2	1	1	1	2.3	2	1	1	1	113060	13076	2312.7	46019	-518	16	385900	519160	288990	441900	-67	-204
Urb2	E9Q7L1	Protein Urb2	7	0	1	1	6.2	7	0	1	0	52571	0	4492.3	3210.9	-255	-143	2501900	0	460830	206700	-374	-204
Polr2e	Q80UW8	DNA-directed RNA polymerases I, II, and III subunit RPABC1	2	1	1	1	14.8	2	0	1	1	NaN	NaN	NaN	NaN	#VALUE!	#VALUE!	272310	355790	401900	332680	47	-206
Dcaf13	Q6PAC3	DDB1- and CUL4-associated factor 13	1	0	1	1	2.2	3	0	0	0	266780000	199400000	2044800	35943000	-14	0	357870	0	216010	187270	-84	-210
Ash2l	Q91X20	Set1/Ash2 histone methyltransferase complex subunit ASH2	0	0	1	1	3.6	0	0	0	2	5725600	5588300	4235200	5262500	23	0	0	0	0	184370	36	-211
Isy1	Q69ZQ2	Pre-mRNA-splicing factor ISY1 homolog	3	1	1	2	14	4	1	1	3	162920	25823	20215	106960	-142	52	555620	753260	1333900	536870	185	-214
Skiv2l	Q6NZR5	Protein Skiv2l	2	0	1	1	3	2	0	0	0	21655	0	5137.9	26547	-96	229	287710	0	224260	174740	-46	-214
Camsap3	Q80VC9	Calmodulin-regulated spectrin-associated protein 3	1	1	1	1	1.4	0	0	2	1	2569400	1902900	846.8	156450	-897	-192	166860	307170	323150	278250	68	-215
	A0A0B4J1I4	Protein Igkv4-72	1	1	1	2	27.4	0	0	0	2	31561	0	7484.1	15125	-72	133	0	0	0	173180	36	-215
St5	Q924W7	Suppression of tumorigenicity 5 protein	5	0	1	1	7.5	7	0	0	0	24681	1588.6	1801	3451.5	-279	-190	1356600	0	137890	168560	-391	-216
Vdac3	Q60931	Voltage-dependent anion-selective channel protein 3	2	0	1	1	8.5	2	0	0	0	28016	3693.4	6845.2	10763	-67	-84	264290	0	303380	168550	4	-217
Zfp266	E9Q2S7	Protein Zfp266	0	0	1	1	2	0	0	0	2	NaN	NaN	NaN	NaN	#VALUE!	#VALUE!	0	0	274410	164230	79	-219
Exosc10	P56960	Exosome component 10	3	1	1	1	6.1	4	1	1	2	77115	59109	138340	22446	295	-310	616370	691620	481100	498110	-82	-221
Tmed10	Q9D1D4	Transmembrane emp24 domain-containing protein 10	3	1	1	2	17.8	3	1	0	1	190650	128670	131780	106050	130	-139	428070	463870	440460	379290	-30	-221
Nip7	Q9CXK8	60S ribosome subunit biogenesis protein NIP7 homolog	5	1	1	2	35	5	0	0	1	223060	32189	46637	130390	-42	55	2305400	4416700	1818900	1971300	-45	-221
Gm5571	P01639	Ig kappa chain V-V region MOPC 41	2	2	1	2	26.9	0	4	1	4	1635100	188090	176660	598320	-44	17	637540	3791500	1796300	1783500	203	-222
Eif4g3	Q80XI3	Eukaryotic translation initiation factor 4 gamma 3	1	0	1	1	4.3	3	0	0	0	1246900	21074	15227	81147	-413	30	100330	0	119020	121380	29	-224
Chd3	E9Q614	Protein Chd3	0	0	1	0	0.5	0	0	3	0	34649	0	11446	17163	1	157	0	0	2102400	0	504	-226
Dyrk1a	Q61214	Dual specificity tyrosine-phosphorylation-regulated kinase 1A	1	0	1	2	3.6	0	0	1	2	0	0	3603.1	11479	51	82	80431	0	229430	0	52	-226
Zfp91	Q62511	E3 ubiquitin-protein ligase ZFP91	1	0	1	1	2.6	0	0	2	0	1951100	1629900	1219300	2013500	62	0	102870	0	377240	0	119	-226
Ttn	A2ASS6	Titin	0	0	1	0	0	0	0	2	0	44267	0	4620.8	11390	-222	79	0	0	605420	0	226	-226
Ssr1	Q9CY50	Translocon-associated protein subunit alpha	2	0	1	0	9.1	2	0	1	0	11503	0	3288.6	3977.6	-91	-95	505420	0	911420	0	105	-226
Pes1	Q9EQ61	Pescadillo homolog	3	0	1	0	6	5	0	2	0	41597	44919	44119	84764	228	-55	918150	0	288500	0	-272	-226
Wdr75	Q3U821	Protein Wdr75	4	0	1	0	7.5	4	0	1	0	1588.2	526.9	1457.5	3616.1	-61	-126	459020	0	355300	0	-88	-226
Rpl32	P62911	60S ribosomal protein L32	1	0	1	0	10.4	2	0	0	0	536610	0	7447.2	22057	-529	201	1163900	0	256170	0	-334	-226
Trip4	Q9QXN3	Activating signal cointegrator 1	3	0	1	0	8.4	5	0	0	0	52515	16308	11709	35338	-56	-63	416820	0	436320	0	-22	-226
Hdac1;Gm10093	O09106	Histone deacetylase 1	1	1	1	0	6.4	2	0	0	0	330810	11333	15337	30825	-294	-43	748270	0	257710	0	-237	-226
Hdlbp	Q8VDJ3	Vigilin	2	0	1	0	2.8	3	0	0	0	690300	28174	5303.7	107080	-606	36	470310	0	364240	0	-84	-226
Sdad1	Q80UZ2	Protein SDA1 homolog	2	0	1	0	3.3	2	0	0	0	116620	29692	9771.6	79049	-249	-17	327730	0	300780	0	-33	-226
Lmod1	Q8BVA4	Leiomodin-1	2	0	1	0	4.7	2	0	0	0	18256	0	4488.3	6584	-101	-19	380670	0	219090	0	-96	-226
Jakmip1	Q8BVL9	Janus kinase and microtubule-interacting protein 1	1	0	1	0	3.2	2	0	0	0	NaN	NaN	NaN	NaN	#VALUE!	#VALUE!	192110	0	254480	0	23	-226
Phf2	Q9WTU0	Lysine-specific demethylase PHF2	2	1	1	1	3.5	2	0	0	0	8939.1	3861.3	718.76	8606.6	-181	-131	235090	0	0	0	-30	-226
Calml3;Calm1	P62204	Calmodulin	1	1	1	1	8.7	0	1	2	1	0	0	7050.6	5538.1	184	-49	197170	350940	445640	273010	118	-234
Hist1h2al;Hist1h2ah;H2afj;Hist1h2aa;Hist2h2ac;Hist1h2ak;Hist1h2af;Hist3h2a;Hist2h2aa1;Hist1h2ab;H2afz;H2afv;Hist2h2ab;H2afx	Q8R1M2	Histone H2A.J	2	2	1	2	22.4	6	4	3	1	126850	23939	7805	8594	-315	-374	1182600	2097300	4069200	1000600	230	-236
Cat	P24270	Catalase	1	1	1	1	2.5	0	2	3	1	31767	10128	1693.9	1798.1	-317	-480	171590	717840	1197500	479090	355	-237
Rrs1	Q9CYH6	Ribosome biogenesis regulatory protein homolog	3	1	1	2	12.1	3	0	0	0	377320	0	16388	41551	-301	318	408010	550450	548820	398240	31	-240
Rplp1	P47955	60S acidic ribosomal protein P1	3	1	1	1	74.6	10	0	1	1	1419.3	727.78	1129.7	6637.5	-74	-39	7032400	351150	233070	265740	-658	-242
	;P01796	Ig heavy chain V-III region A4	1	1	1	1	14.2	1	2	2	1	2028.3	0	1142.4	2646.8	-78	-162	256340	925140	541180	539710	117	-246
Spats2l	Q91WJ7	SPATS2-like protein	2	1	1	0	10	2	0	1	0	0	0	5145.2	7315.8	126	0	411150	226340	251190	0	-109	-248
	A0A0B4J1I1	Protein Igkv16-104	1	1	1	1	13.8	1	1	2	3	137610	12552	69571	44999	97	18	1187600	4327500	522110	1716300	-216	-255
Tbl1xr1;Tbl1x	Q9QXE7	F-box-like/WD repeat-containing protein TBL1X	1	1	1	1	5.6	0	0	2	0	1603400	1297400	703350	1265300	54	-13	0	275670	7188200	151480	727	-255
Lrrfip2	Q91WK0	Leucine-rich repeat flightless-interacting protein 2	1	1	1	0	7.5	1	1	2	0	483370	48494	60578	127640	-101	2	499670	270410	266300	0	-143	-258
Wdr37	Q8CBE3	WD repeat-containing protein 37	1	1	1	0	11.3	0	0	2	0	9451.3	0	3119.8	1768.4	-81	-198	168000	277250	441420	0	125	-261
Rrp9	Q91WM3	U3 small nucleolar RNA-interacting protein 2	2	1	1	1	9.5	5	0	1	0	34985	2069	2069.8	8749.3	-326	-53	1443000	452680	714140	282910	-172	-263
	A0A075B5R7	Protein Ighv14-2 (Fragment)	1	1	1	1	8.5	0	0	0	2	0	0	2403.7	6722.6	-20	-12	493610	969520	561550	492650	-3	-276
Mgst1	Q91VS7	Microsomal glutathione S-transferase 1	2	1	1	1	18.7	2	0	0	0	174140	98170	15371	52412	-203	-209	141600	360880	388400	0	110	-288
Caprin1	Q60865	Caprin-1	3	1	1	1	8.8	3	1	0	0	15572	0	2401.9	5733	-188	-43	499920	645460	442050	344970	-58	-291
	A0A0B4J1J5	Protein Ighv9-3 (Fragment)	2	2	1	1	29.1	2	2	0	1	12638	0	4904.8	7983	-28	11	575710	1518000	337250	600730	-132	-301
Aldoa;Aldoart2	P05064	Fructose-bisphosphate aldolase A	1	1	1	1	10.7	1	1	2	2	38761	1379.7	2436.9	4273	-321	-139	202670	692550	502270	339720	136	-303
C1qb	P14106	Complement C1q subcomponent subunit B	1	1	1	1	4.7	1	2	2	1	3496.2	0	4067.1	6533.8	43	-23	222400	664070	788410	280730	229	-329
Hist3h2ba;Hist1h2bp;Hist1h2bk;Hist3h2bb;Hist1h2bc;Hist2h2bb;Hist2h2be;Hist1h2bh;Hist1h2bb;Hist1h2bm;Hist1h2bf;Gm13646;Hist1h2ba	Q64524	Histone H2B type 2-E	2	1	1	2	19	6	3	4	1	126300	0	10261	19539	-259	181	1090000	1720200	1040700	572120	-30	-334
Tsr1	Q5SWD9	Pre-rRNA-processing protein TSR1 homolog	1	1	1	0	1.4	2	0	0	0	58395	20295	31647	31149	121	-117	277290	487230	324510	0	8	-334
Khdrbs1	Q60749	KH domain-containing, RNA-binding, signal transduction-associated protein 1	3	3	1	2	9.9	14	8	0	1	13978	7732.3	12021	9508.3	145	-203	17983000	12651000	3191100	1960100	-227	-343
	A0A075B5V5	Protein Ighv1-39 (Fragment)	1	1	1	1	12.8	0	1	3	0	83381	16634	6759.1	22518	-250	-154	360500	1523600	430230	515780	14	-344
G3bp2	P97379	Ras GTPase-activating protein-binding protein 2	4	1	1	0	13.9	6	0	0	0	37777	4007.1	4016.8	3485.5	-226	-284	744510	533030	562160	0	-95	-349
Ctsd	P18242	Cathepsin D	1	1	1	1	6.6	0	1	3	1	6526.2	0	12357	10771	236	66	224320	988750	679840	345980	195	-352
	A0A075B5M3	Protein Igkv4-58	1	1	1	1	18.6	0	2	2	2	1546100	221410	296820	386090	8	-27	286270	2039000	661350	594960	149	-363
Map1b	P14873	Microtubule-associated protein 1B	4	12	1	3	8.3	5	21	0	2	2565.8	0	2008.7	3276.3	-61	-140	2103300	10932000	0	1345200	-464	-405
Ttc37	F8VPK0	Protein Ttc37	7	3	1	2	7.5	7	2	0	0	46256	12683	2020.3	2007.1	-367	-508	2689300	1769300	715350	298150	-288	-481
Serpind1	P49182	Heparin cofactor 2	1	1	1	0	2.7	2	2	0	0	25687	23537	20037	14951	172	-266	614720	1541000	416140	0	-113	-525
Kifc5b;Kifc1	Q9QWT9	Kinesin-like protein KIFC1	5	6	1	2	10.9	1	8	0	0	31702	1846.9	6163.8	7162.1	-114	-74	426390	2997300	145320	315500	-147	-578
Golga3	P55937	Golgin subfamily A member 3	5	4	1	0	6.8	5	4	0	0	1852000	698460	215130	859310	-25	-19	623790	2063400	473210	0	-91	-582
4921524L21Rik	Q9D5T2	MCG15536	1	1	1	1	3.2	2	1	0	0	6738.1	5374.4	14217	8064.5	266	-184	2090800	7331300	571610	412830	-281	-673
Mvp	Q9EQK5	Major vault protein	8	8	1	1	19	9	8	0	0	35611	0	7059	4791.2	-106	-70	707020	5661300	338660	305250	-183	-695
Hmgb2	P30681	High mobility group protein B2	0	0	0	5	18.6	0	0	0	5	76893	9865.7	6424.9	19980	-246	-95	0	0	0	8529100	36	534
Morf4l2	Q9R0Q4	Mortality factor 4-like protein 2	0	0	0	2	8.3	0	0	0	2	30926	0	3928.3	6387	-191	-27	0	0	0	7908500	36	525
Fen1	Q91Z50	Flap endonuclease 1	1	0	0	5	17.9	0	0	0	11	19833	0	1367.8	1710.6	-270	-203	35478	0	0	6045100	35	484
Sarnp	Q9D1J3	SAP domain-containing ribonucleoprotein	0	0	0	4	24.8	0	0	0	8	187870	382900	232030	340460	200	-62	0	0	0	5248800	36	463
Hmgb1	P63158	High mobility group protein B1	0	0	0	3	13	0	0	0	3	154680	84524	5743.5	113780	-394	-84	0	0	0	4449800	36	431
Srsf3	P84104	Serine/arginine-rich splicing factor 3	2	1	0	2	14	2	0	0	1	0	0	1133.2	5208.3	-68	-58	6040100	0	0	3572200	-663	399
Rpl21	O09167	60S ribosomal protein L21	5	1	0	3	28.1	8	0	0	3	12145	0	3219.5	2255.5	-105	-183	15694000	527770	0	4539100	-771	315
Snrpa	Q62189	U1 small nuclear ribonucleoprotein A	1	0	0	2	56.8	0	0	0	4	40897	0	13239	32064	13	268	138900	0	0	2166900	13	298
Apex1	P28352	DNA-(apurinic or apyrimidinic site) lyase	0	0	0	2	18.1	0	0	0	5	34831	5370.8	5604.9	9122.9	-144	-162	0	0	0	2031000	36	281
Eif2a	Q8BJW6	Eukaryotic translation initiation factor 2A	0	0	0	3	7.4	0	0	0	4	90549	0	0	8102.2	-531	16	0	0	0	1235100	36	174
Prr12	E9PYL2	Protein Prr12	0	0	0	3	2.9	0	0	0	4	NaN	NaN	NaN	NaN	#VALUE!	#VALUE!	0	0	0	1194400	36	171
Tomm34	Q9CYG7	Mitochondrial import receptor subunit TOM34	0	0	0	2	8.4	0	0	0	2	54739	4510.8	8740.6	14569	-134	-49	0	0	0	1079500	36	144
Pak1ip1	Q9DCE5	p21-activated protein kinase-interacting protein 1	2	0	0	3	11.5	0	0	0	4	2383.6	0	3269.4	2843.1	18	-155	278520	0	0	1066800	-61	140
Isg20l2	Q3U1G5	Interferon-stimulated 20 kDa exonuclease-like 2	3	0	0	3	13.6	4	0	0	3	3939.6	0	6571.3	9224.6	132	37	1608200	0	0	1002100	-423	124
Csnk2b	P67871	Casein kinase II subunit beta	3	0	0	2	31.1	2	0	0	3	79885	11222	8995.8	28545	-186	-55	386010	0	0	874440	-119	96
Phc1	Q3V116	Polyhomeotic-like protein 1	3	0	0	2	8.4	5	0	0	0	11640	0	2888	4023.5	-118	-93	956530	0	0	864730	-332	91
Exosc3	Q7TQK4	Exosome complex component RRP40	2	0	0	1	19.3	3	0	0	2	4345.2	1373.1	197.63	2755.9	-131	-210	744290	0	0	839210	-270	78
Gtf2h4	O70422	General transcription factor IIH subunit 4	2	0	0	3	8	1	0	0	3	120330	16405	3184.7	37638	-481	-58	232540	0	0	820080	-29	69
Nsa2	Q9CR47	Ribosome biogenesis protein NSA2 homolog	2	0	0	2	8.8	3	0	0	1	25561	5741.9	4724	4363.1	-133	-295	858130	0	0	765040	-304	50
Nol7	Q9D7Z3	Nucleolar protein 7	2	0	0	2	13	3	0	0	0	33507	2736.9	6185.8	9448.9	-124	-72	633400	0	0	656460	-235	17
Vrk1	Q80X41	Serine/threonine-protein kinase VRK1	0	0	0	2	5.5	0	0	0	2	368260	221430	124150	366830	24	-36	0	0	0	651250	36	14
Fkbp3	Q62446	Peptidyl-prolyl cis-trans isomerase FKBP3	0	0	0	2	9.8	0	0	0	5	8960.9	0	1492.8	3334.8	-156	-134	0	0	0	641720	36	10
Rpl28	P41105	60S ribosomal protein L28	1	0	0	1	7.3	2	0	0	1	150980	36542	16228	34486	-167	-168	4584800	0	0	595760	-622	-11
Sptan1	P16546	Spectrin alpha chain, non-erythrocytic 1	4	10	0	8	5.8	0	10	0	5	17247	2381.6	2151.3	5240.9	-213	-151	645380	3334300	0	3995500	-239	-24
Pop1	Q8K205	Blood vessel epicardial substance	3	0	0	2	4.5	4	0	0	0	12856	0	5804.6	4734.8	7	-72	533590	0	0	559190	-195	-25
Usp39	Q3TIX9	U4/U6.U5 tri-snRNP-associated protein 2	2	0	0	1	5.9	2	0	0	0	0	0	1641.8	5693.2	-51	-45	898870	0	0	544190	-320	-33
Pspc1	Q8R326	Paraspeckle component 1	2	0	0	1	6.3	4	0	0	0	118390	138550	133620	126790	203	-114	824080	0	0	540270	-295	-37
Myo5b	P21271	Unconventional myosin-Vb	5	0	0	2	4.3	5	0	0	0	20612	7748.5	35834	13124	291	-139	874250	0	0	538810	-313	-39
Ighmbp2	P40694	DNA-binding protein SMUBP-2	3	0	0	1	6.9	6	0	0	1	6526.9	0	10072	9376.7	190	38	451440	0	0	510170	-167	-49
Coil	Q5SU73	Coilin	3	0	0	1	6.7	6	0	0	0	80797	0	2626.6	8945.6	-427	32	983920	0	0	510070	-337	-50
Try4;Try5	Q9QUK9	MCG15083	1	1	0	1	8.1	3	5	0	2	251830	3550.8	2696.2	3091.6	-611	-289	18033000	72471000	0	22401000	-788	-52
Snrpc	Q62241	U1 small nuclear ribonucleoprotein C	1	1	0	1	7.5	4	0	0	1	35444	0	5187.6	7675.4	-161	7	2240000	711860	0	863970	-476	-78
Ccdc137	Q8R0K4	Coiled-coil domain-containing protein 137	2	0	0	1	9.7	2	0	0	0	228870	153790	68690	251840	21	-42	409240	0	0	435000	-138	-88
Rpl10;Rpl10l	Q6ZWV3	60S ribosomal protein L10	3	1	0	1	25.4	12	0	0	4	0	0	0	7602.9	-86	6	10038000	392500	0	581730	-720	-92
	A0A0A6YXQ0	Protein Ighv8-8 (Fragment)	1	0	0	1	13.4	0	0	0	2	11897	0	2184.8	3961.1	-164	-97	132370	0	0	422850	14	-96
Rps27	Q6ZWU9	40S ribosomal protein S27	2	2	0	2	29.3	1	0	0	2	159140	27590	4695.8	16985	-448	-263	669130	916670	0	905640	-245	-105
Rps25	P62852	40S ribosomal protein S25	2	1	0	2	14.4	1	0	0	3	16787	2423.8	9506.1	10450	67	-42	1058400	568880	0	676750	-353	-106
Eif4e2	Q8BMB3	Eukaryotic translation initiation factor 4E type 2	2	0	0	1	11.4	2	0	0	2	0	0	5464.1	4316.7	139	-85	369180	0	0	404230	-106	-110
Imp4	Q8VHZ7	U3 small nucleolar ribonucleoprotein protein IMP4	2	0	0	1	8.2	3	0	0	2	243500	198510	124090	267200	85	-55	598210	0	0	402500	-217	-111
Drg1	P32233	Developmentally-regulated GTP-binding protein 1	0	0	0	2	6.3	0	0	0	2	137570	5671.8	6157.5	19167	-376	-31	0	0	0	387690	36	-115
Ncor2	Q9WU42	Nuclear receptor corepressor 2	0	0	0	1	1	0	0	0	2	8535.8	0	7966.4	4702.4	115	-75	0	0	0	372080	36	-124
Sptbn1	Q62261	Spectrin beta chain, non-erythrocytic 1	4	8	0	7	5.5	0	12	0	8	0	0	3260.4	3712.5	33	-113	863160	3213100	0	2224800	-307	-126
4930550L24Rik	Q99PA7	MCG117379	2	0	0	1	13.1	4	0	0	0	312820	157770	218190	211900	128	-62	673480	0	0	356690	-248	-128
rp9	P97762	Retinitis pigmentosa 9 protein homolog	3	3	0	3	18.8	5	0	0	4	0	0	46504	33876	557	278	2839600	2154000	0	1720200	-538	-129
Hist1h1b	P43276	Histone H1.5	1	0	0	1	7.2	3	0	0	0	3906.7	26165	5657.6	18259	102	-238	646290	0	0	326410	-240	-149
Chtop	Q9CY57	Chromatin target of PRMT1 protein	2	0	0	1	14.3	2	0	0	2	11272	950.53	1613.3	2127.6	-179	-218	584570	0	0	320340	-210	-152
Klf13	Q9JJZ6	Krueppel-like factor 13	1	0	0	1	5.9	1	0	0	2	380760	216440	133290	286180	30	-52	175010	0	0	289440	-4	-163
Ppih	Q9D868	Peptidyl-prolyl cis-trans isomerase H	2	0	0	2	12	2	0	0	1	160730	10565	8703.8	34599	-329	-8	239520	0	0	280940	-35	-168
	Q9CXL3	Uncharacterized protein C7orf50 homolog	1	0	0	1	15.2	2	0	0	0	85337	2341.4	5228.1	4950.8	-303	-162	422220	0	0	266560	-149	-180
Hat1	Q8BY71	Histone acetyltransferase type B catalytic subunit	0	0	0	1	3.1	0	0	0	2	98232	19367	23306	35302	-16	-87	0	0	0	265490	36	-183
Gtf2i	Q9ESZ8	General transcription factor II-I	3	3	0	3	7.8	4	3	0	0	23681	4545.2	4927.1	8783.5	-113	-146	2629800	4755600	0	2429400	-518	-187
Zmat1	Q3V0C1	Zinc finger matrin-type protein 1	3	0	0	1	7.3	4	0	0	0	17035	0	14113	26150	160	225	212460	0	0	256370	-20	-187
Rpp38	Q80UU2	Ribonuclease P protein subunit p38	2	0	0	1	10	3	0	0	1	0	0	812.92	1224.9	-79	-217	413790	0	0	252300	-143	-189
Brd3	Q8K2F0	Bromodomain-containing protein 3	0	0	0	2	2.3	0	0	0	2	0	4573.5	15565	5484.9	364	-227	0	0	0	249260	36	-190
Rnf138	Q9CQE0	E3 ubiquitin-protein ligase RNF138	0	0	0	1	10.2	0	0	0	2	0	0	9532.7	12257	245	93	0	0	0	245120	36	-192
Cdk13	Q69ZA1	Cyclin-dependent kinase 13	4	0	0	1	5.2	5	0	0	0	320350	11309	17915	33219	-255	-29	760100	0	0	244160	-278	-193
Prpf38a	Q4FK66	Pre-mRNA-splicing factor 38A	3	1	0	1	12.2	4	0	0	0	5075.9	0	0	939.85	-137	-227	504350	565460	0	492390	-186	-195
Ppie	Q9QZH3	Peptidyl-prolyl cis-trans isomerase E	2	1	0	1	16.9	6	0	0	1	58060	7934.2	15595	27460	1	-17	426760	894100	0	630250	-153	-199
Bcas2	Q9D287	Pre-mRNA-splicing factor SPF27	3	1	0	3	16.9	4	0	0	2	424300	258830	108200	338870	-8	-51	779260	437580	0	400530	-284	-200
Emg1	O35130	Ribosomal RNA small subunit methyltransferase NEP1	4	1	0	3	25	4	0	0	1	591160	64247	29108	103310	-254	-83	1121400	720120	0	543760	-361	-205
Flna	Q8BTM8	Filamin-A	0	0	0	1	0.6	0	0	0	2	5649.9	1498.9	1036.5	1631.5	-131	-263	0	0	0	193390	36	-207
Elavl1	P70372	ELAV-like protein 1	2	1	0	3	12.9	2	1	0	4	427410	23761	0	32960	-778	-126	871750	851780	0	581950	-311	-208
Myo1e	E9Q634	Unconventional myosin-Ie	4	1	0	1	4.7	6	0	0	0	1276300	30935	20635	119950	-358	45	805200	194490	0	234970	-289	-211
Edf1	Q9JMG1	Endothelial differentiation-related factor 1	0	0	0	1	8.1	0	0	0	2	56149	6210.4	0	13067	-446	-119	0	0	0	183650	36	-212
Bgn	P28653	Biglycan	2	1	0	1	8.4	2	1	0	1	105570	18297	30867	39828	6	-60	197940	284510	0	271490	-13	-213
Hm13;H13	Q9D8V0	Minor histocompatibility antigen H13	2	1	0	1	9.5	2	0	0	0	0	1471	2919.2	3267.8	17	-198	220140	134640	0	190040	-22	-213
Rps19bp1	Q8C6B9	Active regulator of SIRT1	1	0	0	1	12.6	2	0	0	0	159090	96326	138760	120750	161	-86	128940	0	0	174830	15	-213
Ddx24	Q9ESV0	ATP-dependent RNA helicase DDX24	2	0	0	1	3.7	4	0	0	1	81290	106040	57842	103740	171	-123	59052	0	0	111150	34	-225
Sec13	Q9D1M0	Protein SEC13 homolog	1	0	0	1	13.4	2	0	0	1	409900	467430	200430	543950	71	-34	390380	0	0	0	-124	-226
Fam228b	Q497Q6	Protein FAM228B	1	0	0	0	4.7	2	0	0	0	229020	6385.4	13031	11153	-287	-155	3320200	0	0	0	-574	-226
Llph	Q9D945	Protein LLP homolog	2	0	0	0	22.8	2	0	0	0	10455	3801.1	4052.7	5985.2	-47	-192	1188200	0	0	0	-375	-226
Gnb2;Gnb1;Gnb4	P62880	Guanine nucleotide-binding protein G(I)/G(S)/G(T) subunit beta-2	3	0	0	0	15.4	3	0	0	0	15385	0	3474.7	2161.3	-117	-185	1207200	0	0	0	-378	-226
Cav1	P49817	Caveolin-1	2	0	0	0	19.7	5	0	0	0	0	0	0	2495.3	-86	-168	818160	0	0	0	-292	-226
U2surp	Q6NV83	U2 snRNP-associated SURP motif-containing protein	2	0	0	0	2.1	3	0	0	0	49319	3588.6	6533.4	5050	-165	-209	1122600	0	0	0	-362	-226
Bcap31	Q61335	B-cell receptor-associated protein 31	2	0	0	0	13.5	3	0	0	0	6534.4	0	859.55	583.1	-143	-231	679340	0	0	0	-250	-226
Zc3hav1	Q3UPF5	Zinc finger CCCH-type antiviral protein 1	3	0	0	0	6.5	4	0	0	0	107080	99045	37851	135960	32	-73	766060	0	0	0	-281	-226
Sycp3	P70281	Synaptonemal complex protein 3	2	0	0	0	12.6	3	0	0	0	0	0	0	11562	-86	85	510990	0	0	0	-191	-226
Pwp1	Q99LL5	Periodic tryptophan protein 1 homolog	2	0	0	0	7.4	4	0	0	0	0	0	6971.1	5057.6	182	-63	623460	0	0	0	-229	-226
Eif4g2	Q62448	Eukaryotic translation initiation factor 4 gamma 2	4	0	0	0	7.3	4	0	0	0	41529	0	3690.1	2298	-257	-179	615740	0	0	0	-223	-226
Rrbp1	Q99PL5	Ribosome-binding protein 1	3	0	0	0	4.3	3	0	0	0	100520	122110	44017	129060	69	-94	610360	0	0	0	-220	-226
Phf14	Q9D4H9	PHD finger protein 14	2	0	0	0	4.3	3	0	0	0	325250	123940	0	143490	-734	-86	579980	0	0	0	-209	-226
Leng8	Q8CBY3	Leukocyte receptor cluster member 8 homolog	2	0	0	0	7	2	0	0	0	0	0	5532.7	2626.7	141	-163	502080	0	0	0	-185	-226
Utp18	Q5SSI6	U3 small nucleolar RNA-associated protein 18 homolog	2	0	0	0	7.2	2	0	0	0	7718.9	3481.4	4323.2	3393.7	7	-268	594960	0	0	0	-215	-226
Surf6	P70279	Surfeit locus protein 6	2	0	0	0	10.1	3	0	0	0	10165	1347.2	2430.9	1342.4	-136	-264	672130	0	0	0	-247	-226
Ddx54	Q8K4L0	ATP-dependent RNA helicase DDX54	2	0	0	0	4.8	2	0	0	0	0	0	2998.5	1836.8	22	-195	422010	0	0	0	-148	-226
Scaf4;Scaf8	Q6PFF0	Protein Scaf4	2	0	0	0	3.1	3	0	0	0	3951.6	1534.8	2833	5197.2	-37	-119	420090	0	0	0	-146	-226
Srrm2	Q8BTI8	Serine/arginine repetitive matrix protein 2	3	0	0	0	1.8	3	0	0	0	11181	0	1431	1728.9	-181	-200	288810	0	0	0	-67	-226
No66	Q9JJF3	Bifunctional lysine-specific demethylase and histidyl-hydroxylase NO66	1	0	0	0	2.3	2	0	0	0	4643.4	0	1822.1	2117.2	-92	-187	350050	0	0	0	-97	-226
Tpm4	Q6IRU2	Tropomyosin alpha-4 chain	2	0	0	1	6	3	0	0	0	10029	779.05	2011.9	1582.5	-155	-234	212030	0	0	0	-19	-226
Luc7l	Q9CYI4	Putative RNA-binding protein Luc7-like 1	2	0	0	0	7	2	0	0	0	9711.9	0	1284.8	0	-178	-233	438360	0	0	0	-160	-226
Sfmbt2	Q5DTW2	Scm-like with four MBT domains protein 2	2	0	0	0	4.1	2	0	0	0	49986	0	0	0	-427	-233	306730	0	0	0	-77	-226
Synm	Q70IV5	Synemin	2	0	0	0	2.6	2	0	0	0	3163.4	0	3392.3	2292.2	14	-180	300010	0	0	0	-74	-226
Glipr2	Q9CYL5	Golgi-associated plant pathogenesis-related protein 1	1	0	0	0	8.4	2	0	0	0	0	0	15011	0	352	-233	147230	0	0	0	10	-226
Zmpste24	Q80W54	CAAX prenyl protease 1 homolog	1	0	0	0	11	2	0	0	0	0	0	67.106	0	-85	-233	299430	0	0	0	-72	-226
Ddost	O54734	Dolichyl-diphosphooligosaccharide--protein glycosyltransferase 48 kDa subunit	2	0	0	0	5.7	2	0	0	0	60951	0	10520	0	-113	-233	264190	0	0	0	-54	-226
Clca1;Clca2	Q9EQR4	Chloride channel calcium activated 2	1	0	0	0	7.1	2	0	0	0	6813.5	0	1313.8	0	-139	-233	157980	0	0	0	8	-226
Dnm2	P39054	Dynamin-2	1	0	0	0	1.9	2	0	0	0	0	0	12263	0	300	-233	125280	0	0	0	16	-226
Purb	O35295	Transcriptional activator protein Pur-beta	1	0	0	0	9.9	2	0	0	0	4381.8	0	2821.2	15756	-41	139	165730	0	0	0	2	-226
Ighv3-6	P18531	Ig heavy chain V region 3-6	1	1	0	1	13.8	1	0	0	2	34008	0	5171.9	0	-155	-233	182260	786760	0	507420	-6	-231
Uaca	Q8CGB3	Uveal autoantigen with coiled-coil domains and ankyrin repeats	6	2	0	1	6.9	4	0	0	0	6608.1	0	1343.3	0	-132	-233	936580	501710	0	366180	-326	-237
Myo1d	Q5SYD0	Unconventional myosin-Id	5	1	0	1	8.1	7	0	0	0	16572	0	5375.5	0	-40	-233	1907900	192860	0	0	-447	-238
Eef1d	P57776	Elongation factor 1-delta	2	1	0	1	18.6	2	0	0	0	5277.3	0	7275.4	0	134	-233	244150	365290	0	270360	-40	-241
Pwp2	Q8BU03	Periodic tryptophan protein 2 homolog	7	3	0	2	11.3	8	0	0	1	11741	0	2964.1	0	-113	-233	1275300	1193800	0	628700	-389	-245
	A0A075B5L7	Protein Igkv4-80 (Fragment)	0	1	0	1	13.8	0	1	0	2	20286	0	1875.1	0	-254	-233	0	868840	0	495990	36	-252
	Q9CQE8	UPF0568 protein C14orf166 homolog	4	1	0	1	23.8	3	0	0	1	0	0	2776.6	0	6	-233	711320	570060	0	339700	-263	-278
	A0A075B666	Protein Igkv12-47 (Fragment)	1	1	0	1	13.8	1	1	0	2	0	0	1743.1	0	-46	-233	542210	1089400	0	508520	-199	-279
Sipa1l3	S4R2N4	Protein Sipa1l3	3	1	0	0	6.3	4	0	0	0	92077	0	0	0	-532	-233	434570	369370	0	0	-158	-291
Rps15	P62843	40S ribosomal protein S15	1	1	0	1	16.1	5	0	0	2	0	0	2617	0	-6	-233	3216700	602360	0	288280	-559	-312
Bag6	Q9Z1R2	Large proline-rich protein BAG6	1	1	0	0	14.8	2	0	0	0	16165	0	11806	0	126	-233	189820	488870	0	0	-9	-335
Rer1	Q9CQU3	Protein RER1	2	1	0	0	28.1	2	1	0	0	0	0	3827.1	0	62	-233	413350	773020	0	0	-142	-403
	A0A075B5R4	Protein Ighv14-1 (Fragment)	1	1	0	0	10.3	2	1	0	0	0	0	0	0	-86	-233	345630	1105100	0	0	-96	-456
Trerf1	Q8BXJ2	Transcriptional-regulating factor 1	2	3	0	0	5.1	2	1	0	0	317110	0	6299.8	0	-480	-233	536670	1143600	0	0	-198	-467
Hp	Q61646	Haptoglobin	2	2	0	1	5.8	2	2	0	0	2613.8	0	1708.1	0	-69	-233	466540	1541000	0	231110	-172	-499
Tpp2	Q64514	Tripeptidyl-peptidase 2	3	3	0	0	7.6	3	3	0	0	19758	0	1382.2	0	-267	-233	764490	1379000	0	0	-280	-500
1700049E17Rik1;1700049E17Rik2	E9Q8F7	Protein 1700049E17Rik1	1	1	0	1	10.4	4	1	0	1	922.9	0	488.74	0	-84	-233	2211600	13642000	0	800310	-475	-566
Rps12	P63323	40S ribosomal protein S12	1	1	0	1	16.7	4	3	0	1	43538	0	2322	0	-345	-233	2810000	3326400	0	332180	-534	-588
	P01652	Ig kappa chain V-V region J606	1	1	0	0	14.8	4	1	0	0	0	0	2577.2	0	-9	-233	27800000	86832000	0	0	-808	-918
