# Supplementary material for: PRDM9 activity depends on HELLS and promotes local 5-hydroxymethylcytosine enrichment
Source: eLife journal article supplement (doi:10.7554/elife.57117), 2020-10-13

**Table 1- source data file 1**

**A**

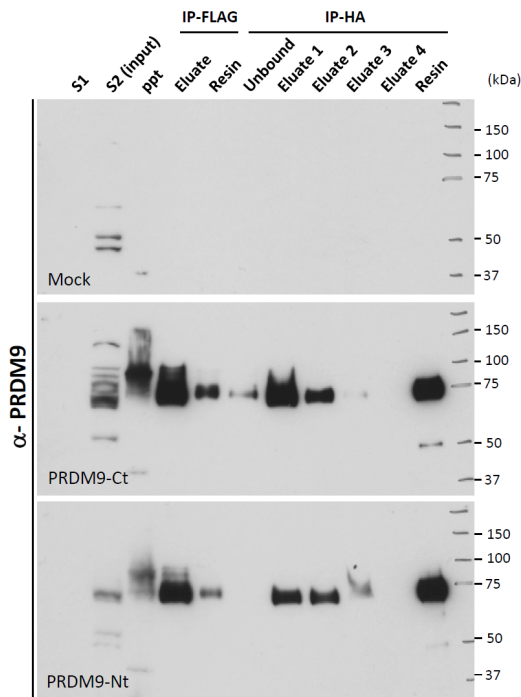

**B**

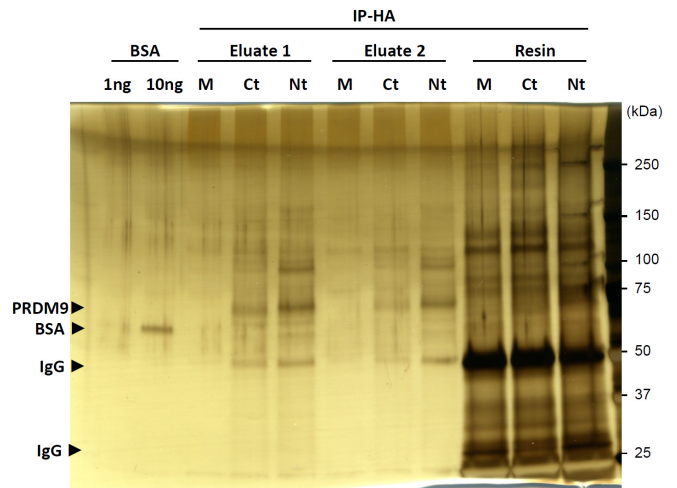

**C**

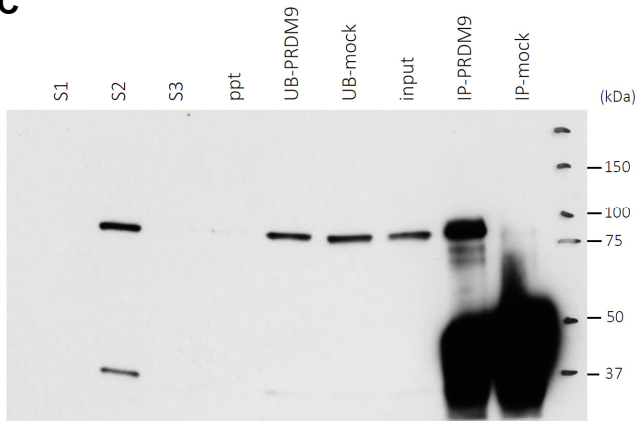

**D**

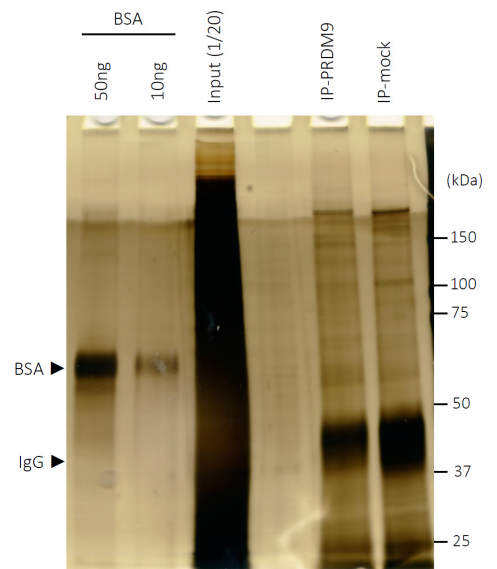

**E**

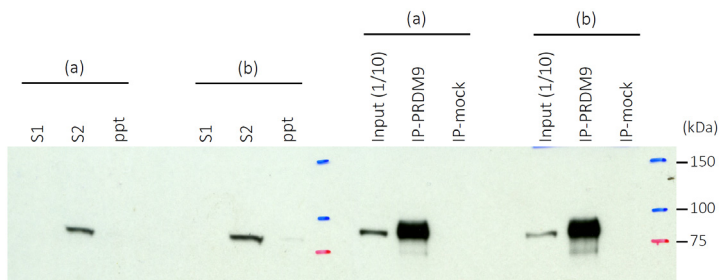

**F**

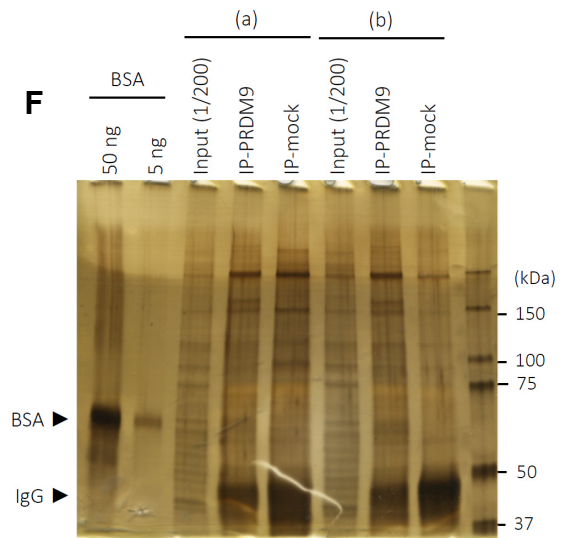

Supplement: table1-data1 [file elife-57117-table1-data1-v2.pdf]
