# Supplementary figures and images for: PRDM9 activity depends on HELLS and promotes local 5-hydroxymethylcytosine enrichment
Source: eLife journal article supplement (doi:10.7554/elife.57117), 2020-10-13

Figure 2 – figure supplement 2

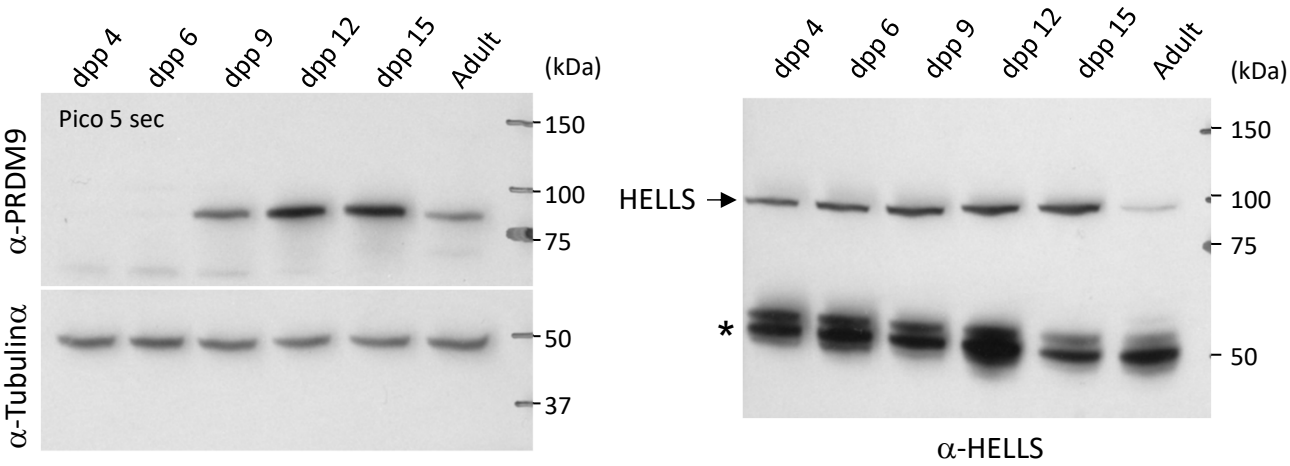

Supplement: supp [file elife_poa_e57117_Figure_2_figure_supplement_2.pdf › elife_poa_e57117_Figure_2_figure_supplement_2.pdf]

Figure 2- figure supplement 3

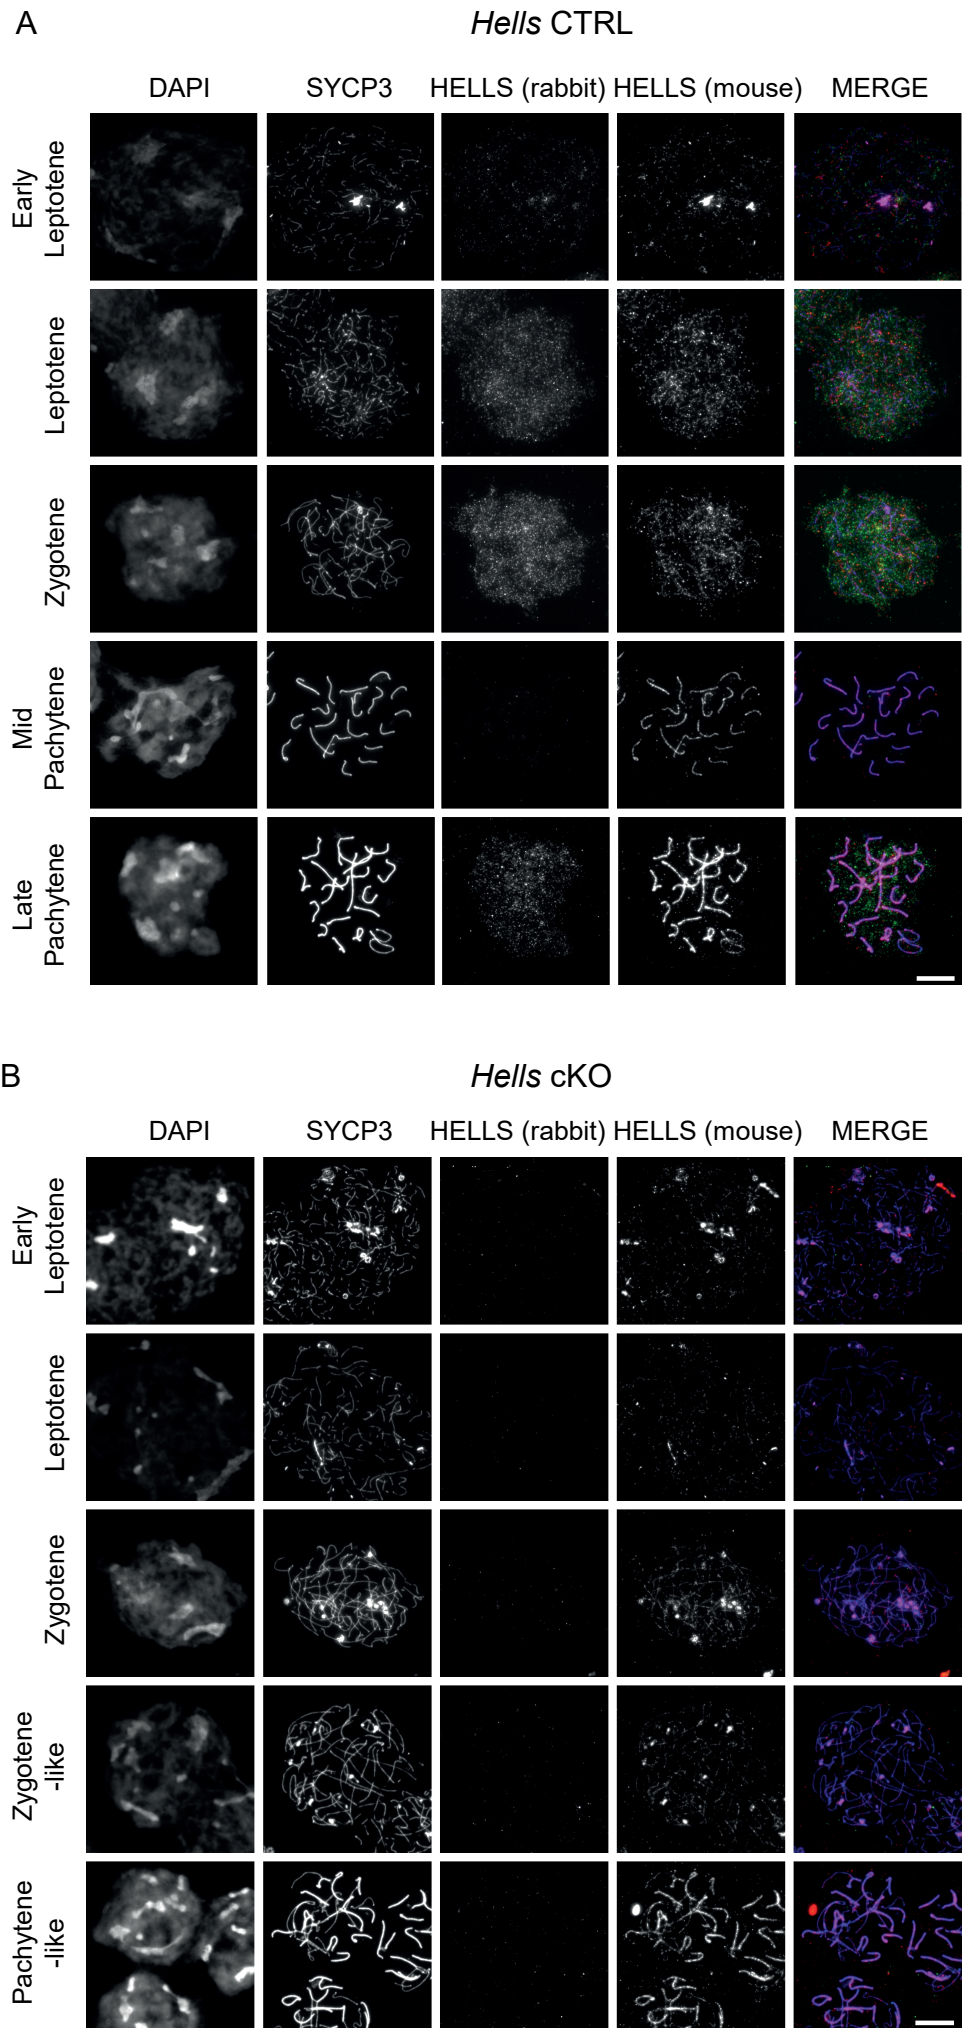

Supplement: supp [file elife_poa_e57117_Figure_2_figure_supplement_3.pdf › elife_poa_e57117_Figure_2_figure_supplement_3.pdf]

Figure 2- figure supplement 4

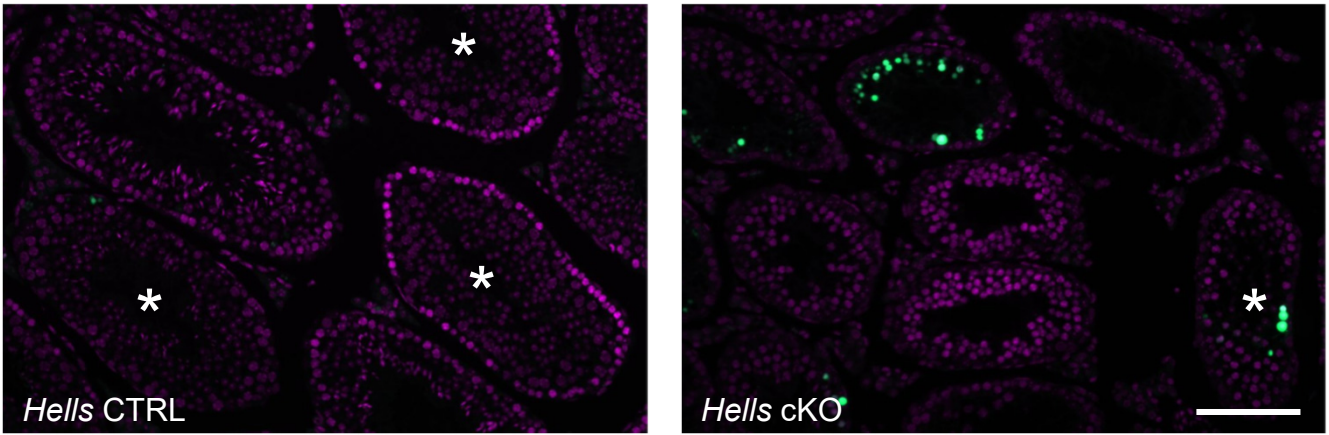

Supplement: supp [file elife_poa_e57117_Figure_2_figure_supplement_4.pdf › elife_poa_e57117_Figure_2_figure_supplement_4.pdf]

Figure 2- figure supplement 5

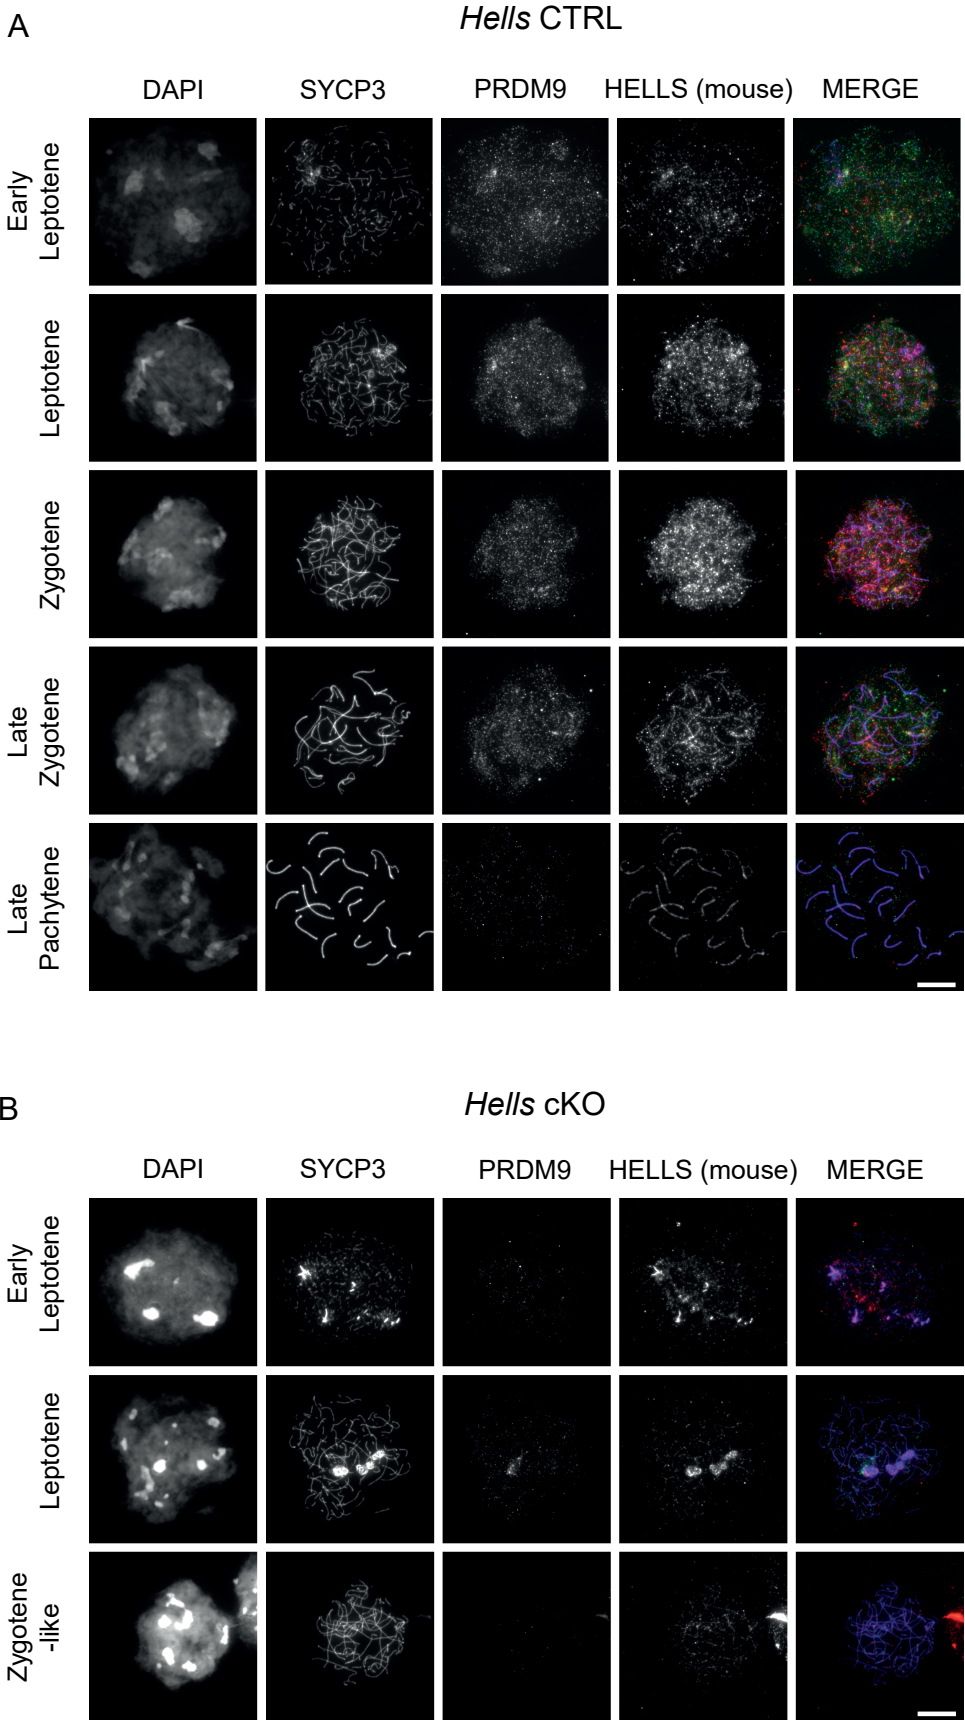

Supplement: supp [file elife_poa_e57117_Figure_2_figure_supplement_5.pdf › elife_poa_e57117_Figure_2_figure_supplement_5.pdf]

Figure 3- figure supplement 1

A

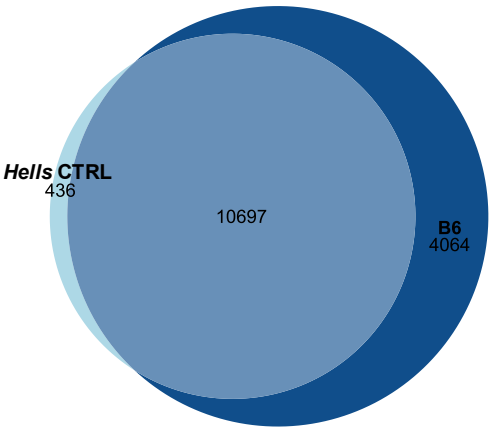

B

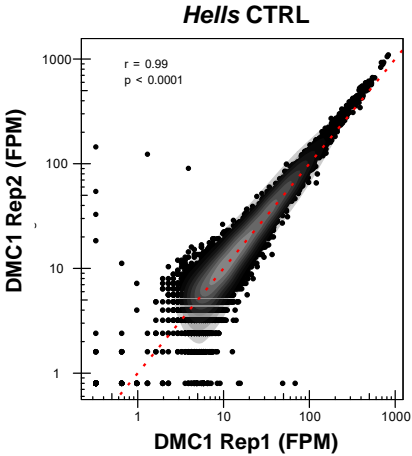

C

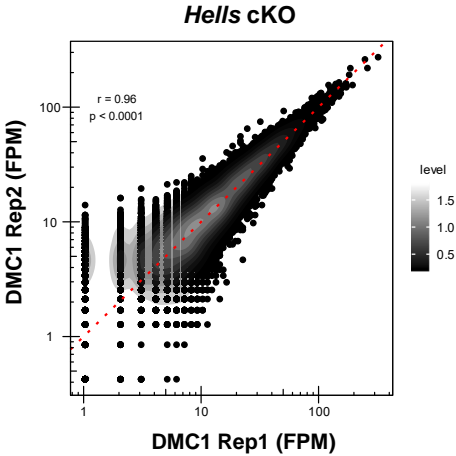

Supplement: supp [file elife_poa_e57117_Figure_3_figure_supplement_1.pdf › elife_poa_e57117_Figure_3_figure_supplement_1.pdf]

Figure 3- figure supplement 2

A

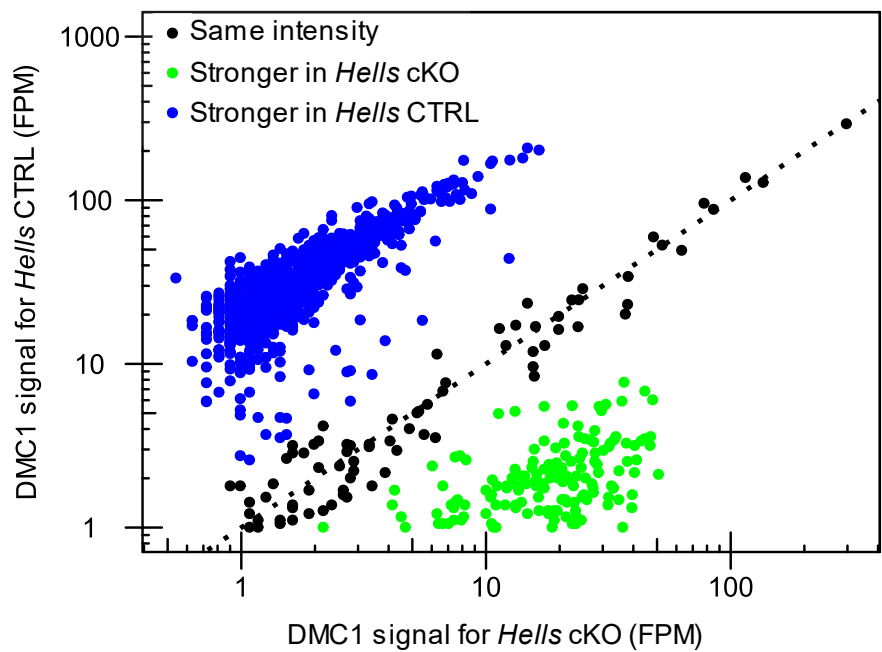

B

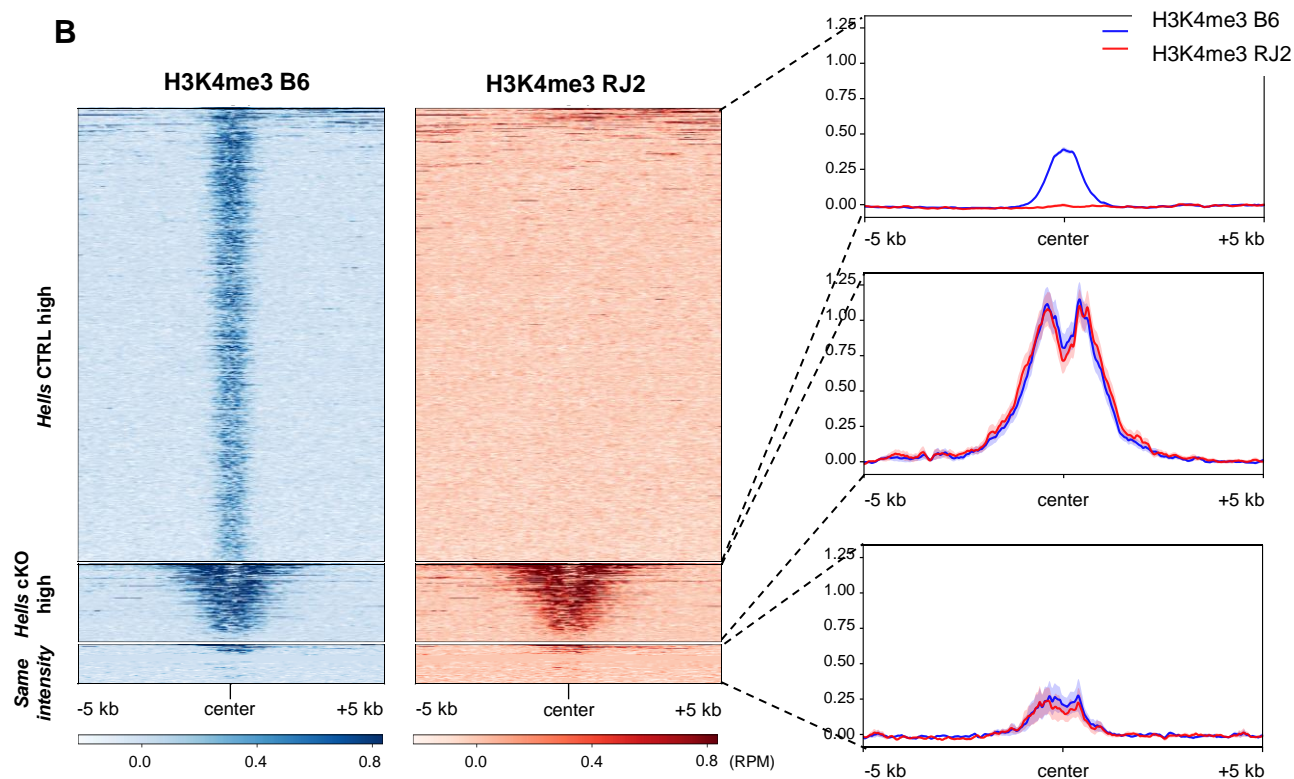

Supplement: supp [file elife_poa_e57117_Figure_3_figure_supplement_2.pdf › elife_poa_e57117_Figure_3_figure_supplement_2.pdf]

Figure 4- figure supplement 1

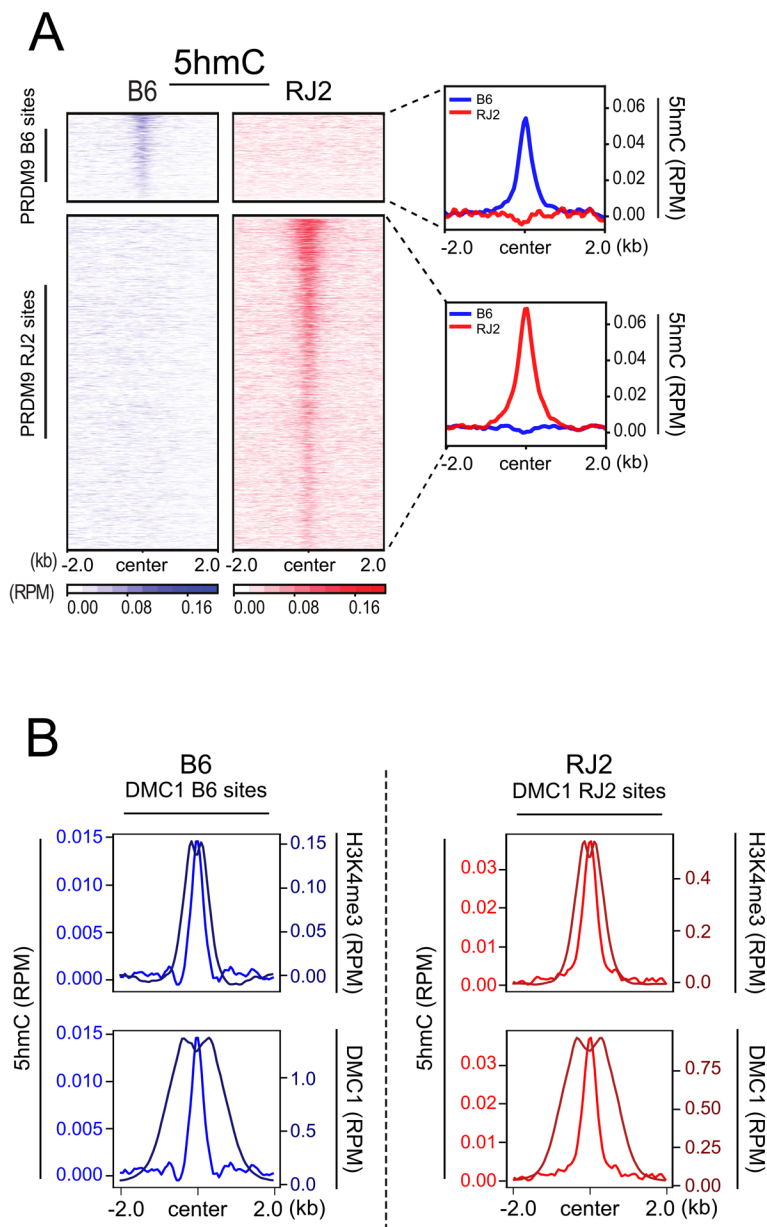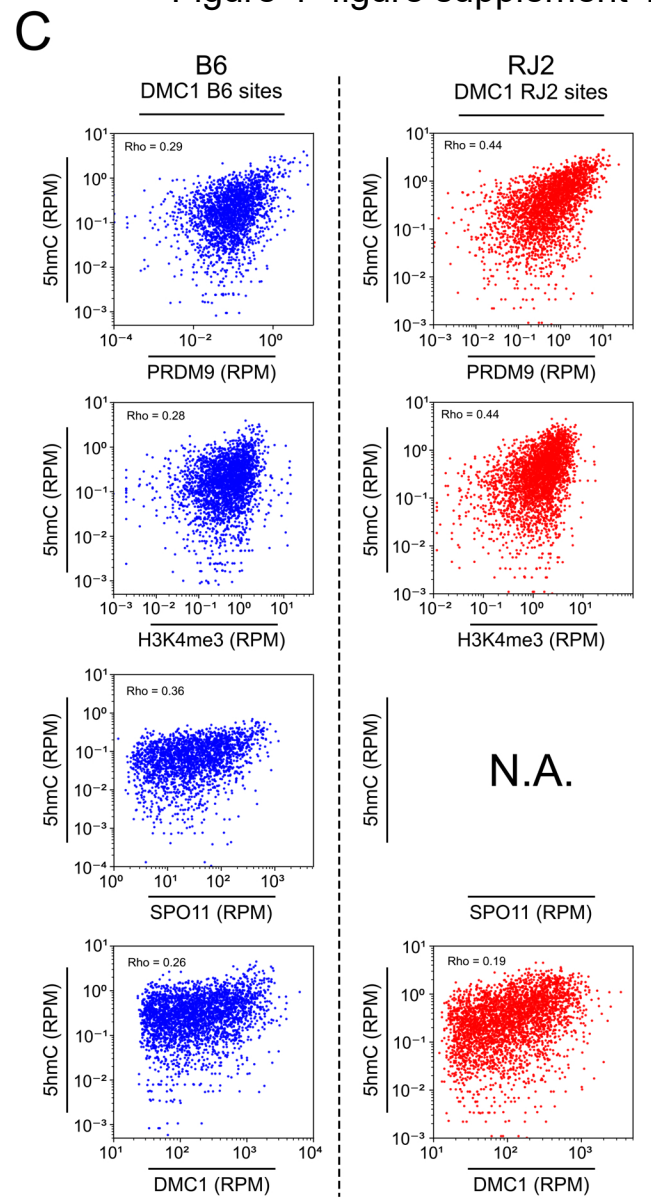

Supplement: supp [file elife_poa_e57117_Figure_4_figure_supplement_1.pdf › elife_poa_e57117_Figure_4_figure_supplement_1.pdf]

### DMC1 B6 sites

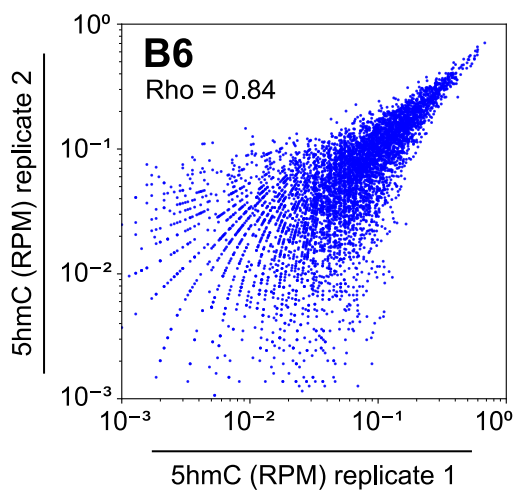

### DMC1 RJ2 sites

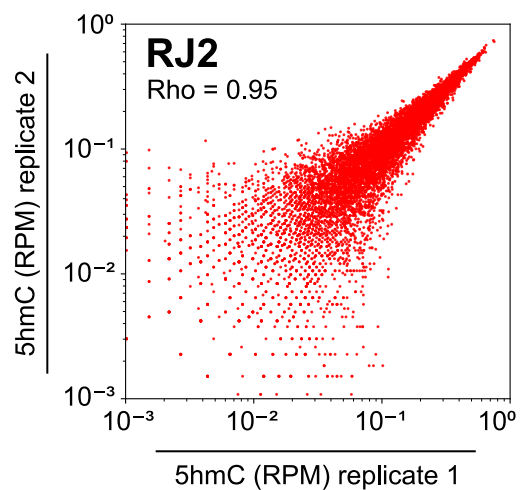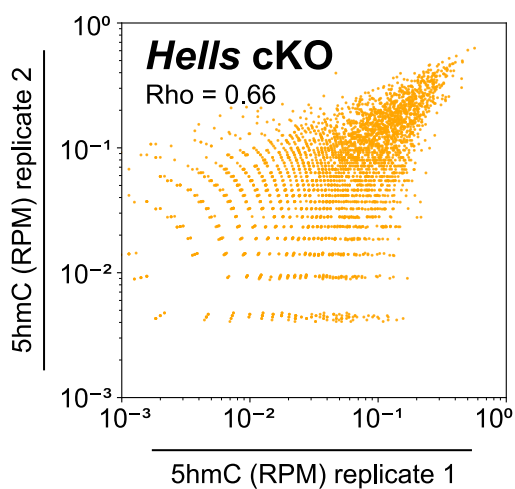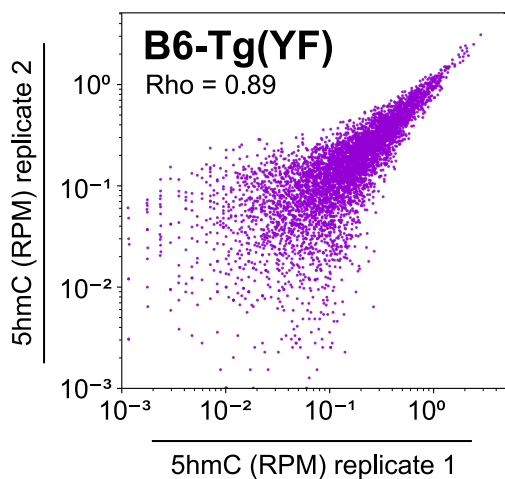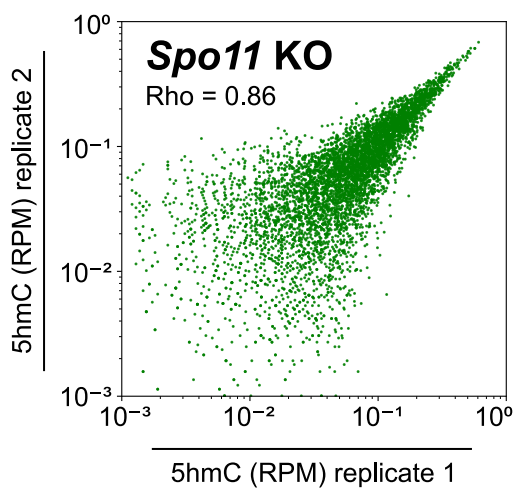

Figure 4- figure supplement 2

Supplement: supp [file elife_poa_e57117_Figure_4_figure_supplement_2.pdf › elife_poa_e57117_Figure_4_figure_supplement_2.pdf]

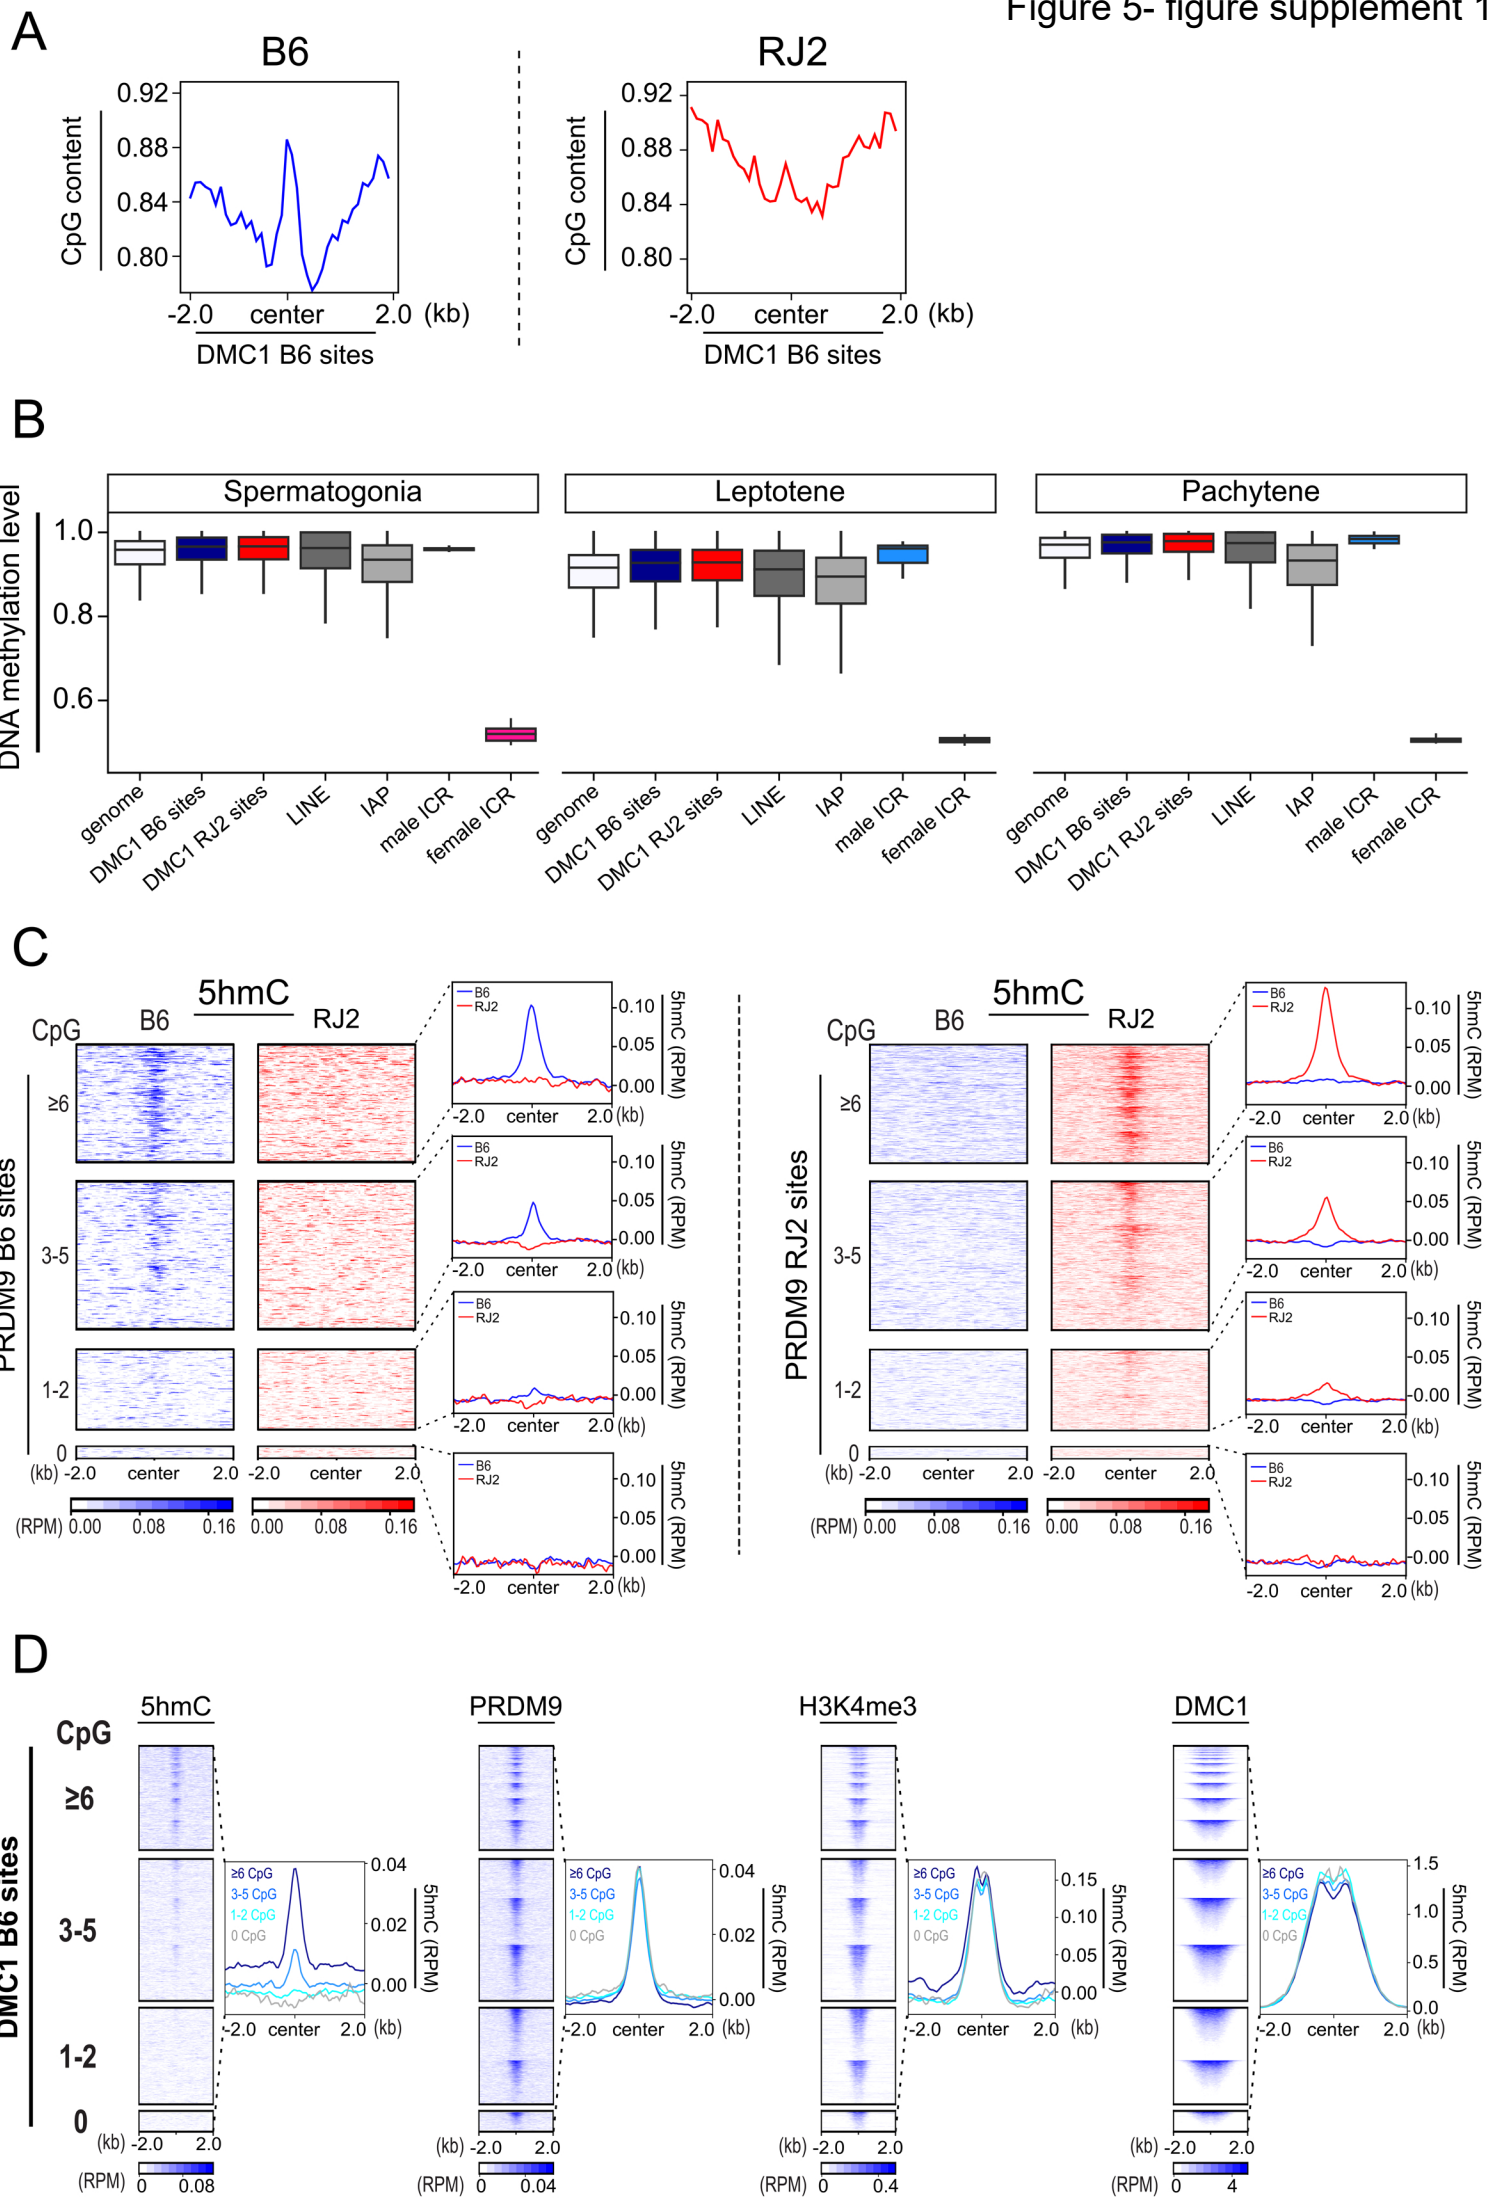

Supplement: supp [file elife_poa_e57117_Figure_5_figure_supplement_1.pdf › elife_poa_e57117_Figure_5_figure_supplement_1.pdf]
